# Supplementary material for: Genome-Wide Locations of Potential Epimutations Associated with Environmentally Induced Epigenetic Transgenerational Inheritance of Disease Using a Sequential Machine Learning Prediction Approach
Source: PubMed Central journal article supplement (PMC4646459; doi:10.1371/journal.pone.0142274), 2015-11-16
Supplement: pone.0142274.s002.pdf [file pone.0142274.s002.pdf]

## Supplemental Table S2

### Predicted DMR/Epimutation Sites

(A) Final list of susceptible DMRs (includes 3+ consecutive sites only) in germ cell (3233)

| Potential DMR site     | Length | CpG /100bp |
|------------------------|--------|------------|
| chr1:429001-432001     | 3000   | 0.5        |
| chr1:2248001-2251001   | 3000   | 0.7        |
| chr1:2774364-2778364   | 4000   | 0.125      |
| chr1:3983364-3986364   | 3000   | 0.66666667 |
| chr1:4073364-4076364   | 3000   | 0.76666667 |
| chr1:4379364-4383364   | 4000   | 1.075      |
| chr1:4662364-4665364   | 3000   | 1.1        |
| chr1:4755364-4761364   | 6000   | 0.55       |
| chr1:4854364-4858364   | 4000   | 0.375      |
| chr1:5461364-5464364   | 3000   | 0.83333333 |
| chr1:5706364-5709364   | 3000   | 1.13333333 |
| chr1:5938364-5941364   | 3000   | 0.66666667 |
| chr1:6150364-6153364   | 3000   | 0.83333333 |
| chr1:6757364-6762364   | 5000   | 0.62       |
| chr1:6818364-6821364   | 3000   | 0.63333333 |
| chr1:6843364-6846364   | 3000   | 1.13333333 |
| chr1:9115364-9118364   | 3000   | 1          |
| chr1:9127364-9130364   | 3000   | 1.3        |
| chr1:9484364-9487364   | 3000   | 0.56666667 |
| chr1:10199364-10202364 | 3000   | 0.36666667 |
| chr1:10342364-10345364 | 3000   | 0.3        |
| chr1:11547364-11553364 | 6000   | 0.28333333 |
| chr1:14526364-14530364 | 4000   | 1.325      |
| chr1:14649364-14652364 | 3000   | 1.5        |
| chr1:14970364-14973364 | 3000   | 1.6        |
| chr1:17003364-17006364 | 3000   | 0.56666667 |
| chr1:18263364-18266364 | 3000   | 0.8        |
| chr1:18904364-18908364 | 4000   | 0.4        |
| chr1:19352364-19355364 | 3000   | 0.66666667 |
| chr1:20158364-20162364 | 4000   | 0.775      |
| chr1:20273364-20276364 | 3000   | 1.2        |
| chr1:20867364-20870364 | 3000   | 1.33333333 |
| chr1:20956364-20959364 | 3000   | 0.23333333 |
| chr1:22524364-22528364 | 4000   | 0.675      |
| chr1:23052364-23057364 | 5000   | 0.46       |
| chr1:24126364-24129364 | 3000   | 0.93333333 |
| chr1:25458364-25461364 | 3000   | 0.5        |
| chr1:27414364-27420364 | 6000   | 1.05       |
| chr1:27544364-27547364 | 3000   | 0.86666667 |
| chr1:28858364-28862364 | 4000   | 0.325      |
| chr1:29211364-29214364 | 3000   | 0.46666667 |
| chr1:29983364-29986364 | 3000   | 0.4        |
| chr1:30149364-30152364 | 3000   | 0.96666667 |
| chr1:31733364-31738364 | 5000   | 0.24       |

|                        |      |            |
|------------------------|------|------------|
| chr1:33231364-33234364 | 3000 | 0.86666667 |
| chr1:33280364-33283364 | 3000 | 1.13333333 |
| chr1:33525364-33531364 | 6000 | 0.41666667 |
| chr1:33971364-33975364 | 4000 | 0.375      |
| chr1:34123364-34128364 | 5000 | 0.5        |
| chr1:34134364-34137364 | 3000 | 0.26666667 |
| chr1:34231364-34235364 | 4000 | 0.85       |
| chr1:34296364-34301364 | 5000 | 0.38       |
| chr1:35597364-35600364 | 3000 | 1.03333333 |
| chr1:36202364-36205364 | 3000 | 0.9        |
| chr1:37015364-37020364 | 5000 | 0.94       |
| chr1:41505862-41508862 | 3000 | 1.73333333 |
| chr1:43005862-43009862 | 4000 | 1.5        |
| chr1:43032862-43035862 | 3000 | 1.23333333 |
| chr1:45212862-45215862 | 3000 | 1.4        |
| chr1:45236862-45240862 | 4000 | 0.55       |
| chr1:45919862-45922862 | 3000 | 1.96666667 |
| chr1:46324862-46327862 | 3000 | 1.53333333 |
| chr1:46534862-46537862 | 3000 | 1.53333333 |
| chr1:46626862-46633862 | 7000 | 0.72857143 |
| chr1:48057862-48060862 | 3000 | 1.03333333 |
| chr1:48197862-48200862 | 3000 | 1          |
| chr1:48618862-48621862 | 3000 | 1.3        |
| chr1:48642862-48645862 | 3000 | 0.86666667 |
| chr1:49155862-49158862 | 3000 | 0.36666667 |
| chr1:49202862-49206862 | 4000 | 0.375      |
| chr1:50450862-50453862 | 3000 | 0.53333333 |
| chr1:51114862-51117862 | 3000 | 0.26666667 |
| chr1:53183862-53186862 | 3000 | 0.56666667 |
| chr1:53429862-53434862 | 5000 | 1.28       |
| chr1:53654862-53658862 | 4000 | 0.8        |
| chr1:53703862-53706862 | 3000 | 0.46666667 |
| chr1:54013862-54017862 | 4000 | 0.925      |
| chr1:54262862-54266862 | 4000 | 1.025      |
| chr1:54871862-54874862 | 3000 | 0.2        |
| chr1:55549862-55552862 | 3000 | 0.66666667 |
| chr1:55854862-55858862 | 4000 | 0.425      |
| chr1:55932862-55937862 | 5000 | 0.58       |
| chr1:56174862-56177862 | 3000 | 0.8        |
| chr1:56853862-56856862 | 3000 | 0.43333333 |
| chr1:56914862-56917862 | 3000 | 0.43333333 |
| chr1:56964862-56967862 | 3000 | 0.26666667 |
| chr1:57085862-57088862 | 3000 | 0.43333333 |
| chr1:57425862-57428862 | 3000 | 0.1        |
| chr1:58616862-58619862 | 3000 | 1.06666667 |
| chr1:59363862-59366862 | 3000 | 0.7        |
| chr1:59774862-59777862 | 3000 | 0.33333333 |
| chr1:60541862-60546862 | 5000 | 0.5        |
| chr1:74200549-74204549 | 4000 | 0.225      |
| chr1:75581549-75584549 | 3000 | 0.6        |
| chr1:77666300-77671300 | 5000 | 1.08       |
| chr1:81291561-81294561 | 3000 | 1.03333333 |
| chr1:81360561-81363561 | 3000 | 0.56666667 |

|                          |      |            |
|--------------------------|------|------------|
| chr1:84740637-84743637   | 3000 | 0.43333333 |
| chr1:86540444-86543444   | 3000 | 1.2        |
| chr1:89644575-89650575   | 6000 | 1.23333333 |
| chr1:91342575-91345575   | 3000 | 0.9        |
| chr1:91752575-91755575   | 3000 | 0.63333333 |
| chr1:92092575-92096575   | 4000 | 0.275      |
| chr1:92135575-92139575   | 4000 | 0.575      |
| chr1:92307575-92311575   | 4000 | 0.9        |
| chr1:92621575-92627575   | 6000 | 0.5        |
| chr1:100839655-100842655 | 3000 | 0.5        |
| chr1:102372655-102376655 | 4000 | 0.5        |
| chr1:103608655-103611655 | 3000 | 0.2        |
| chr1:104511655-104514655 | 3000 | 0.26666667 |
| chr1:104907655-104910655 | 3000 | 0.23333333 |
| chr1:105618655-105621655 | 3000 | 0.46666667 |
| chr1:105887655-105891655 | 4000 | 0.475      |
| chr1:106383655-106387655 | 4000 | 0.475      |
| chr1:107670655-107674655 | 4000 | 0.45       |
| chr1:107835655-107838655 | 3000 | 0.36666667 |
| chr1:107927655-107931655 | 4000 | 0.575      |
| chr1:108071655-108075655 | 4000 | 0.425      |
| chr1:108084655-108087655 | 3000 | 0.26666667 |
| chr1:108662655-108665655 | 3000 | 0.5        |
| chr1:108836655-108839655 | 3000 | 1          |
| chr1:109694655-109698655 | 4000 | 0.325      |
| chr1:109828655-109833655 | 5000 | 0.4        |
| chr1:109989655-109992655 | 3000 | 1.3        |
| chr1:110081655-110084655 | 3000 | 0.23333333 |
| chr1:110613655-110616655 | 3000 | 0.5        |
| chr1:110648655-110651655 | 3000 | 0.33333333 |
| chr1:111685655-111688655 | 3000 | 0.36666667 |
| chr1:111744655-111747655 | 3000 | 0.23333333 |
| chr1:111841655-111844655 | 3000 | 0.4        |
| chr1:111877655-111880655 | 3000 | 0.16666667 |
| chr1:112792655-112796655 | 4000 | 0.25       |
| chr1:112883655-112886655 | 3000 | 0.5        |
| chr1:112967655-112970655 | 3000 | 0.43333333 |
| chr1:112978655-112981655 | 3000 | 0.13333333 |
| chr1:112994655-112997655 | 3000 | 0.36666667 |
| chr1:113293655-113296655 | 3000 | 0.33333333 |
| chr1:113358655-113362655 | 4000 | 0.2        |
| chr1:113526655-113529655 | 3000 | 0.63333333 |
| chr1:113579655-113582655 | 3000 | 0.53333333 |
| chr1:113737655-113740655 | 3000 | 0.53333333 |
| chr1:113753655-113756655 | 3000 | 0.36666667 |
| chr1:113803655-113806655 | 3000 | 0.23333333 |
| chr1:113870655-113875655 | 5000 | 0.36       |
| chr1:113899655-113904655 | 5000 | 0.48       |
| chr1:114004655-114007655 | 3000 | 0.33333333 |
| chr1:114426655-114429655 | 3000 | 0.23333333 |
| chr1:114441655-114444655 | 3000 | 0.3        |
| chr1:114476655-114480655 | 4000 | 0.3        |
| chr1:116250655-116253655 | 3000 | 0.4        |

|                          |      |            |
|--------------------------|------|------------|
| chr1:117368655-117371655 | 3000 | 0.46666667 |
| chr1:118295655-118298655 | 3000 | 1.03333333 |
| chr1:119005655-119009655 | 4000 | 0.8        |
| chr1:119384655-119387655 | 3000 | 0.8        |
| chr1:119499655-119502655 | 3000 | 1.03333333 |
| chr1:121078877-121082877 | 4000 | 1.075      |
| chr1:123549877-123552877 | 3000 | 0.66666667 |
| chr1:123820877-123823877 | 3000 | 0.83333333 |
| chr1:124634877-124637877 | 3000 | 0.63333333 |
| chr1:125667929-125670929 | 3000 | 1.36666667 |
| chr1:125875929-125881929 | 6000 | 0.36666667 |
| chr1:126629929-126633929 | 4000 | 0.6        |
| chr1:127778929-127782929 | 4000 | 0.525      |
| chr1:128229929-128233929 | 4000 | 1.125      |
| chr1:129495929-129499929 | 4000 | 1.075      |
| chr1:129548929-129551929 | 3000 | 0.66666667 |
| chr1:130032929-130035929 | 3000 | 0.9        |
| chr1:130217929-130220929 | 3000 | 0.73333333 |
| chr1:131750752-131753752 | 3000 | 0.33333333 |
| chr1:133129752-133132752 | 3000 | 0.33333333 |
| chr1:133364752-133367752 | 3000 | 0.36666667 |
| chr1:139003759-139007759 | 4000 | 0.55       |
| chr1:139494759-139499759 | 5000 | 0.56       |
| chr1:139527759-139530759 | 3000 | 0.5        |
| chr1:142452187-142455187 | 3000 | 0.46666667 |
| chr1:143050187-143054187 | 4000 | 0.525      |
| chr1:143767187-143770187 | 3000 | 0.2        |
| chr1:143978187-143982187 | 4000 | 0.525      |
| chr1:144613187-144616187 | 3000 | 0.46666667 |
| chr1:144798187-144801187 | 3000 | 0.73333333 |
| chr1:144845187-144850187 | 5000 | 0.72       |
| chr1:145344187-145348187 | 4000 | 0.675      |
| chr1:145594187-145598187 | 4000 | 0.45       |
| chr1:147825042-147828042 | 3000 | 0.46666667 |
| chr1:151018042-151022042 | 4000 | 0.55       |
| chr1:151320042-151325042 | 5000 | 0.3        |
| chr1:152375042-152378042 | 3000 | 0.3        |
| chr1:163688846-163692846 | 4000 | 0.225      |
| chr1:166934550-166937550 | 3000 | 0.4        |
| chr1:171642550-171646550 | 4000 | 1.05       |
| chr1:172600782-172603782 | 3000 | 0.43333333 |
| chr1:182691061-182694061 | 3000 | 0.5        |
| chr1:182705061-182708061 | 3000 | 0.36666667 |
| chr1:182878061-182881061 | 3000 | 0.7        |
| chr1:183743061-183746061 | 3000 | 0.46666667 |
| chr1:183822061-183825061 | 3000 | 0.66666667 |
| chr1:184073061-184077061 | 4000 | 0.625      |
| chr1:184444061-184447061 | 3000 | 1.3        |
| chr1:191489919-191493919 | 4000 | 0.6        |
| chr1:193835919-193838919 | 3000 | 0.7        |
| chr1:194338919-194342919 | 4000 | 0.575      |
| chr1:195714919-195718919 | 4000 | 0.75       |
| chr1:195787919-195791919 | 4000 | 0.425      |

|                          |      |            |
|--------------------------|------|------------|
| chr1:195833919-195837919 | 4000 | 0.775      |
| chr1:197327432-197330432 | 3000 | 1.03333333 |
| chr1:197394432-197397432 | 3000 | 0.6        |
| chr1:197617432-197623432 | 6000 | 0.75       |
| chr1:197889432-197892432 | 3000 | 0.26666667 |
| chr1:198117432-198120432 | 3000 | 0.43333333 |
| chr1:198318432-198321432 | 3000 | 0.33333333 |
| chr1:199568432-199571432 | 3000 | 1.03333333 |
| chr1:202030803-202034803 | 4000 | 0.65       |
| chr1:210832677-210835677 | 3000 | 0.33333333 |
| chr1:214268321-214271321 | 3000 | 0.43333333 |
| chr1:214305321-214308321 | 3000 | 0.33333333 |
| chr1:215242080-215245080 | 3000 | 0.2        |
| chr1:216845879-216848879 | 3000 | 0.4        |
| chr1:217285879-217289879 | 4000 | 0.675      |
| chr1:217319879-217322879 | 3000 | 0.33333333 |
| chr1:217935879-217938879 | 3000 | 0.6        |
| chr1:217983879-217987879 | 4000 | 0.3        |
| chr1:218076879-218079879 | 3000 | 0.86666667 |
| chr1:218151879-218156879 | 5000 | 0.62       |
| chr1:218508879-218515879 | 7000 | 0.68571429 |
| chr1:218815879-218819879 | 4000 | 1.1        |
| chr1:218842879-218845879 | 3000 | 0.73333333 |
| chr1:218848879-218851879 | 3000 | 0.46666667 |
| chr1:218901879-218910879 | 9000 | 0.45555556 |
| chr1:218959879-218962879 | 3000 | 0.53333333 |
| chr1:219042879-219045879 | 3000 | 0.23333333 |
| chr1:219451879-219455879 | 4000 | 0.65       |
| chr1:221618879-221621879 | 3000 | 0.63333333 |
| chr1:222019879-222022879 | 3000 | 0.4        |
| chr1:222819879-222822879 | 3000 | 0.73333333 |
| chr1:222901879-222904879 | 3000 | 0.43333333 |
| chr1:222911879-222914879 | 3000 | 0.43333333 |
| chr1:222929879-222932879 | 3000 | 0.56666667 |
| chr1:223901879-223905879 | 4000 | 0.85       |
| chr1:224124879-224131879 | 7000 | 0.78571429 |
| chr1:224246879-224249879 | 3000 | 0.6        |
| chr1:224306879-224309879 | 3000 | 0.33333333 |
| chr1:224703879-224707879 | 4000 | 0.625      |
| chr1:224715879-224718879 | 3000 | 1          |
| chr1:225208879-225211879 | 3000 | 0.5        |
| chr1:226866879-226870879 | 4000 | 0.75       |
| chr1:227012879-227016879 | 4000 | 0.525      |
| chr1:228061879-228064879 | 3000 | 1.73333333 |
| chr1:229619879-229623879 | 4000 | 1.125      |
| chr1:230283056-230286056 | 3000 | 0.5        |
| chr1:230381056-230384056 | 3000 | 1.13333333 |
| chr1:230613056-230618056 | 5000 | 0.5        |
| chr1:230795056-230804056 | 9000 | 0.3        |
| chr1:231836056-231839056 | 3000 | 0.5        |
| chr1:235850745-235855745 | 5000 | 0.68       |
| chr1:237049745-237052745 | 3000 | 0.7        |
| chr1:237312745-237315745 | 3000 | 0.76666667 |

|                          |      |            |
|--------------------------|------|------------|
| chr1:239100745-239104745 | 4000 | 0.725      |
| chr1:239812745-239816745 | 4000 | 0.75       |
| chr1:239878745-239883745 | 5000 | 0.64       |
| chr1:244688808-244691808 | 3000 | 0.96666667 |
| chr1:245364808-245368808 | 4000 | 1.1        |
| chr1:247662808-247665808 | 3000 | 1.1        |
| chr1:247848808-247851808 | 3000 | 1.23333333 |
| chr1:247860808-247864808 | 4000 | 0.475      |
| chr1:253596776-253599776 | 3000 | 0.7        |
| chr1:253632776-253635776 | 3000 | 0.93333333 |
| chr1:253663776-253666776 | 3000 | 1.46666667 |
| chr1:254570776-254575776 | 5000 | 0.82       |
| chr1:254985776-254988776 | 3000 | 0.8        |
| chr1:255025776-255028776 | 3000 | 0.23333333 |
| chr1:255231776-255234776 | 3000 | 0.8        |
| chr1:255957776-255961776 | 4000 | 0.85       |
| chr1:256976776-256980776 | 4000 | 0.375      |
| chr1:257739776-257743776 | 4000 | 0.35       |
| chr1:258394776-258397776 | 3000 | 1.23333333 |
| chr1:258443776-258446776 | 3000 | 0.5        |
| chr1:258941776-258944776 | 3000 | 2.06666667 |
| chr1:260567846-260570846 | 3000 | 0.86666667 |
| chr1:261100846-261104846 | 4000 | 0.9        |
| chr1:263310846-263315846 | 5000 | 1.78       |
| chr1:265280846-265283846 | 3000 | 0.83333333 |
| chr1:267073846-267077846 | 4000 | 0.35       |
| chr10:2487219-2491219    | 4000 | 1.475      |
| chr10:2537219-2540219    | 3000 | 0.9        |
| chr10:2777219-2780219    | 3000 | 0.5        |
| chr10:2817219-2820219    | 3000 | 0.73333333 |
| chr10:2881219-2884219    | 3000 | 0.43333333 |
| chr10:3553219-3556219    | 3000 | 0.63333333 |
| chr10:3727219-3731219    | 4000 | 1.525      |
| chr10:8228219-8231219    | 3000 | 0.93333333 |
| chr10:14687487-14690487  | 3000 | 1.23333333 |
| chr10:18544714-18547714  | 3000 | 1.26666667 |
| chr10:23010714-23013714  | 3000 | 0.33333333 |
| chr10:24128714-24131714  | 3000 | 0.43333333 |
| chr10:25048714-25051714  | 3000 | 0.6        |
| chr10:25395714-25398714  | 3000 | 0.83333333 |
| chr10:26476714-26479714  | 3000 | 0.36666667 |
| chr10:27859714-27862714  | 3000 | 0.33333333 |
| chr10:28040714-28043714  | 3000 | 0.6        |
| chr10:28515714-28518714  | 3000 | 0.86666667 |
| chr10:30563714-30566714  | 3000 | 1.1        |
| chr10:30588714-30591714  | 3000 | 0.73333333 |
| chr10:30598714-30602714  | 4000 | 0.575      |
| chr10:33089714-33092714  | 3000 | 0.76666667 |
| chr10:45042550-45046550  | 4000 | 0.75       |
| chr10:49226538-49229538  | 3000 | 1.3        |
| chr10:49449538-49454538  | 5000 | 0.94       |
| chr10:49564538-49567538  | 3000 | 0.66666667 |
| chr10:49584538-49587538  | 3000 | 0.43333333 |

|                           |      |            |
|---------------------------|------|------------|
| chr10:49744538-49747538   | 3000 | 1.06666667 |
| chr10:49924538-49928538   | 4000 | 0.825      |
| chr10:49986538-49990538   | 4000 | 0.6        |
| chr10:51080538-51083538   | 3000 | 0.73333333 |
| chr10:51394538-51397538   | 3000 | 0.6        |
| chr10:51401538-51404538   | 3000 | 1.46666667 |
| chr10:51408538-51411538   | 3000 | 1.16666667 |
| chr10:52421538-52424538   | 3000 | 0.4        |
| chr10:52764538-52767538   | 3000 | 0.43333333 |
| chr10:52848538-52851538   | 3000 | 0.36666667 |
| chr10:53088538-53091538   | 3000 | 0.53333333 |
| chr10:53141538-53144538   | 3000 | 0.5        |
| chr10:53221538-53224538   | 3000 | 0.83333333 |
| chr10:53368538-53371538   | 3000 | 0.56666667 |
| chr10:58148804-58151804   | 3000 | 0.33333333 |
| chr10:58737804-58740804   | 3000 | 0.56666667 |
| chr10:71985127-71989127   | 4000 | 1.05       |
| chr10:78239106-78243106   | 4000 | 0.875      |
| chr10:79463106-79466106   | 3000 | 0.56666667 |
| chr10:80001106-80004106   | 3000 | 0.86666667 |
| chr10:80692106-80696106   | 4000 | 0.5        |
| chr10:88760611-88763611   | 3000 | 0.76666667 |
| chr10:100239097-100242097 | 3000 | 1.36666667 |
| chr10:100666097-100669097 | 3000 | 1.3        |
| chr11:404001-407001       | 3000 | 0.26666667 |
| chr11:1936001-1939001     | 3000 | 0.46666667 |
| chr11:1962001-1965001     | 3000 | 0.66666667 |
| chr11:1967001-1970001     | 3000 | 0.63333333 |
| chr11:2079001-2082001     | 3000 | 0.46666667 |
| chr11:2115001-2118001     | 3000 | 0.4        |
| chr11:2606001-2609001     | 3000 | 0.26666667 |
| chr11:3585001-3588001     | 3000 | 0.16666667 |
| chr11:3841001-3848001     | 7000 | 0.75714286 |
| chr11:4696001-4699001     | 3000 | 0.73333333 |
| chr11:6564456-6568456     | 4000 | 0.25       |
| chr11:6785456-6793456     | 8000 | 0.325      |
| chr11:6885456-6889456     | 4000 | 0.4        |
| chr11:7473456-7477456     | 4000 | 0.725      |
| chr11:7687456-7690456     | 3000 | 0.4        |
| chr11:9003456-9006456     | 3000 | 0.7        |
| chr11:9129456-9135456     | 6000 | 0.41666667 |
| chr11:9871456-9874456     | 3000 | 0.66666667 |
| chr11:9928456-9931456     | 3000 | 0.53333333 |
| chr11:10038456-10041456   | 3000 | 0.53333333 |
| chr11:10074456-10077456   | 3000 | 0.3        |
| chr11:11273456-11277456   | 4000 | 0.9        |
| chr11:12338456-12341456   | 3000 | 0.7        |
| chr11:12454456-12458456   | 4000 | 0.45       |
| chr11:14437456-14440456   | 3000 | 0.36666667 |
| chr11:15041456-15044456   | 3000 | 0.53333333 |
| chr11:15058456-15061456   | 3000 | 0.5        |
| chr11:15682456-15687456   | 5000 | 0.76       |
| chr11:15697456-15701456   | 4000 | 0.925      |

|                         |      |            |
|-------------------------|------|------------|
| chr11:15726456-15729456 | 3000 | 0.53333333 |
| chr11:16015456-16018456 | 3000 | 0.4        |
| chr11:16941456-16945456 | 4000 | 0.525      |
| chr11:17439456-17442456 | 3000 | 1          |
| chr11:18658625-18661625 | 3000 | 0.16666667 |
| chr11:18756625-18759625 | 3000 | 0.43333333 |
| chr11:19417625-19420625 | 3000 | 0.93333333 |
| chr11:20691191-20695191 | 4000 | 0.725      |
| chr11:22576191-22579191 | 3000 | 1.26666667 |
| chr11:23322191-23327191 | 5000 | 0.4        |
| chr11:23513191-23516191 | 3000 | 0.43333333 |
| chr11:23536191-23539191 | 3000 | 0.43333333 |
| chr11:24101191-24104191 | 3000 | 0.7        |
| chr11:24929191-24934191 | 5000 | 0.56       |
| chr11:25160191-25165191 | 5000 | 0.8        |
| chr11:26768191-26771191 | 3000 | 0.83333333 |
| chr11:26909191-26912191 | 3000 | 0.53333333 |
| chr11:27786191-27791191 | 5000 | 0.52       |
| chr11:28198191-28203191 | 5000 | 0.52       |
| chr11:28999191-29003191 | 4000 | 0.3        |
| chr11:29210191-29214191 | 4000 | 0.675      |
| chr11:29233191-29237191 | 4000 | 0.45       |
| chr11:29394191-29397191 | 3000 | 0.8        |
| chr11:29442191-29445191 | 3000 | 0.56666667 |
| chr11:29499191-29502191 | 3000 | 1          |
| chr11:30549191-30554191 | 5000 | 0.76       |
| chr11:30565191-30568191 | 3000 | 1.83333333 |
| chr11:31397191-31401191 | 4000 | 0.9        |
| chr11:32310191-32313191 | 3000 | 1.9        |
| chr11:36878191-36881191 | 3000 | 1.23333333 |
| chr11:37038191-37043191 | 5000 | 1.52       |
| chr11:38444191-38447191 | 3000 | 0.36666667 |
| chr11:39013191-39017191 | 4000 | 0.8        |
| chr11:40736191-40739191 | 3000 | 0.36666667 |
| chr11:41053191-41056191 | 3000 | 0.76666667 |
| chr11:41131191-41134191 | 3000 | 0.96666667 |
| chr11:41910191-41913191 | 3000 | 0.6        |
| chr11:42605191-42608191 | 3000 | 0.43333333 |
| chr11:43450191-43454191 | 4000 | 0.625      |
| chr11:43760191-43763191 | 3000 | 0.53333333 |
| chr11:44766191-44769191 | 3000 | 0.46666667 |
| chr11:45121191-45124191 | 3000 | 0.8        |
| chr11:45129191-45132191 | 3000 | 0.7        |
| chr11:45205191-45208191 | 3000 | 0.93333333 |
| chr11:46221191-46224191 | 3000 | 0.43333333 |
| chr11:48694191-48697191 | 3000 | 0.43333333 |
| chr11:49965191-49968191 | 3000 | 0.93333333 |
| chr11:49973191-49977191 | 4000 | 0.3        |
| chr11:50785191-50788191 | 3000 | 0.63333333 |
| chr11:51235191-51238191 | 3000 | 1.26666667 |
| chr11:51315191-51318191 | 3000 | 0.7        |
| chr11:52606191-52609191 | 3000 | 0.9        |
| chr11:53334191-53339191 | 5000 | 0.46       |



|                         |       |            |
|-------------------------|-------|------------|
| chr11:54097191-54100191 | 3000  | 0.63333333 |
| chr11:54224191-54227191 | 3000  | 0.46666667 |
| chr11:54345191-54348191 | 3000  | 0.5        |
| chr11:54621191-54625191 | 4000  | 0.3        |
| chr11:54717191-54721191 | 4000  | 0.4        |
| chr11:56220800-56223800 | 3000  | 0.86666667 |
| chr11:56847800-56850800 | 3000  | 0.5        |
| chr11:59939306-59943306 | 4000  | 0.8        |
| chr11:60531306-60534306 | 3000  | 0.36666667 |
| chr11:61193306-61196306 | 3000  | 0.53333333 |
| chr11:61533306-61537306 | 4000  | 0.65       |
| chr11:61597306-61602306 | 5000  | 0.62       |
| chr11:62644306-62647306 | 3000  | 0.5        |
| chr11:65219306-65222306 | 3000  | 0.2        |
| chr11:65528306-65531306 | 3000  | 1.5        |
| chr11:73192306-73196306 | 4000  | 0.8        |
| chr11:73322306-73325306 | 3000  | 0.6        |
| chr11:73468306-73473306 | 5000  | 0.66       |
| chr11:73544306-73548306 | 4000  | 0.5        |
| chr11:74078306-74081306 | 3000  | 0.93333333 |
| chr11:74519306-74523306 | 4000  | 0.775      |
| chr11:74538306-74541306 | 3000  | 0.8        |
| chr11:74542306-74545306 | 3000  | 1.43333333 |
| chr11:74666306-74669306 | 3000  | 1.2        |
| chr11:75330306-75333306 | 3000  | 0.8        |
| chr11:75373306-75376306 | 3000  | 0.76666667 |
| chr11:75432306-75435306 | 3000  | 1.16666667 |
| chr11:75735306-75738306 | 3000  | 0.53333333 |
| chr11:76597495-76601495 | 4000  | 0.925      |
| chr11:76665495-76668495 | 3000  | 0.63333333 |
| chr11:78754495-78757495 | 3000  | 0.53333333 |
| chr11:79165495-79168495 | 3000  | 0.83333333 |
| chr11:79320495-79323495 | 3000  | 0.43333333 |
| chr11:79332495-79335495 | 3000  | 0.63333333 |
| chr11:79387495-79390495 | 3000  | 0.66666667 |
| chr11:80516495-80519495 | 3000  | 0.86666667 |
| chr11:80521495-80526495 | 5000  | 1.26       |
| chr11:80590495-80594495 | 4000  | 1.15       |
| chr11:81750495-81754495 | 4000  | 1.4        |
| chr11:82165495-82169495 | 4000  | 0.3        |
| chr11:82236495-82240495 | 4000  | 0.375      |
| chr11:83287228-83290228 | 3000  | 1.33333333 |
| chr11:83391228-83396228 | 5000  | 0.74       |
| chr11:83447228-83450228 | 3000  | 0.56666667 |
| chr11:83713458-83717458 | 4000  | 0.475      |
| chr11:84245458-84251458 | 6000  | 0.86666667 |
| chr11:86447794-86450794 | 3000  | 0.43333333 |
| chr11:86552794-86555794 | 3000  | 0.56666667 |
| chr12:15278837-15288837 | 10000 | 1.8        |
| chr12:15535837-15539837 | 4000  | 1.025      |
| chr12:15682837-15691837 | 9000  | 1.73333333 |
| chr12:15869837-15872837 | 3000  | 1.73333333 |
| chr12:16266837-16275837 | 9000  | 1.41111111 |

|                         |       |            |
|-------------------------|-------|------------|
| chr12:17498864-17503864 | 5000  | 0.96       |
| chr12:17661864-17665864 | 4000  | 0.925      |
| chr12:17669864-17672864 | 3000  | 0.86666667 |
| chr12:18002864-18005864 | 3000  | 0.36666667 |
| chr12:18070864-18073864 | 3000  | 0.66666667 |
| chr12:18618864-18621864 | 3000  | 0.63333333 |
| chr12:19536864-19549864 | 13000 | 1.50769231 |
| chr12:19854329-19858329 | 4000  | 2.075      |
| chr12:20331329-20336329 | 5000  | 0.52       |
| chr12:20348329-20351329 | 3000  | 0.43333333 |
| chr12:20887329-20890329 | 3000  | 0.83333333 |
| chr12:21065303-21075303 | 10000 | 1.38       |
| chr12:21236303-21252303 | 16000 | 0.7875     |
| chr12:21253303-21262303 | 9000  | 0.74444444 |
| chr12:21502303-21514303 | 12000 | 0.95       |
| chr12:21745303-21751303 | 6000  | 1.81666667 |
| chr12:22054303-22057303 | 3000  | 0.7        |
| chr12:22065303-22069303 | 4000  | 0.875      |
| chr12:22447303-22453303 | 6000  | 1.81666667 |
| chr12:22544303-22562303 | 18000 | 1.65       |
| chr12:22608303-22612303 | 4000  | 1.3        |
| chr12:22764303-22775303 | 11000 | 1.78181818 |
| chr12:22884303-22899303 | 15000 | 1.52666667 |
| chr12:22910303-22917303 | 7000  | 0.94285714 |
| chr12:22983303-23002303 | 19000 | 1.33684211 |
| chr12:23270303-23275303 | 5000  | 1.32       |
| chr12:23370303-23376303 | 6000  | 1.53333333 |
| chr12:23495303-23503303 | 8000  | 1.9125     |
| chr12:24059303-24063303 | 4000  | 1.1        |
| chr12:24322303-24326303 | 4000  | 0.6        |
| chr12:24350303-24354303 | 4000  | 0.775      |
| chr12:24361303-24366303 | 5000  | 0.94       |
| chr12:24652303-24657303 | 5000  | 0.88       |
| chr12:24904303-24908303 | 4000  | 0.65       |
| chr12:30908483-30911483 | 3000  | 0.63333333 |
| chr12:32236483-32248483 | 12000 | 1.56666667 |
| chr12:32455483-32462483 | 7000  | 1.62857143 |
| chr12:32546483-32549483 | 3000  | 1.5        |
| chr12:32557483-32560483 | 3000  | 1.73333333 |
| chr12:32629483-32633483 | 4000  | 2.075      |
| chr12:32802483-32810483 | 8000  | 2          |
| chr12:32848483-32855483 | 7000  | 1.71428571 |
| chr12:32959483-32962483 | 3000  | 2.23333333 |
| chr12:33043483-33046483 | 3000  | 1.5        |
| chr12:33173483-33176483 | 3000  | 5.36666667 |
| chr12:33221483-33228483 | 7000  | 1.67142857 |
| chr12:33409483-33425483 | 16000 | 1.6125     |
| chr12:33612929-33621929 | 9000  | 2.05555556 |
| chr12:34452929-34461929 | 9000  | 2.12222222 |
| chr12:34650929-34664929 | 14000 | 1.56428571 |
| chr12:35177929-35183929 | 6000  | 1.2        |
| chr12:35497929-35504929 | 7000  | 1.4        |
| chr12:35598929-35610929 | 12000 | 1.49166667 |

|                         |       |            |
|-------------------------|-------|------------|
| chr12:36178929-36198929 | 20000 | 1.4        |
| chr12:37124929-37128929 | 4000  | 1.975      |
| chr12:37302929-37305929 | 3000  | 1.43333333 |
| chr12:37955929-37958929 | 3000  | 1.9        |
| chr12:37987929-37990929 | 3000  | 2.1        |
| chr12:38379929-38385929 | 6000  | 1.55       |
| chr12:38883929-38886929 | 3000  | 1.23333333 |
| chr12:38887929-38890929 | 3000  | 1.43333333 |
| chr12:39468929-39473929 | 5000  | 2.46       |
| chr12:39981929-39984929 | 3000  | 2.06666667 |
| chr12:40146929-40149929 | 3000  | 1.43333333 |
| chr12:45768806-45771806 | 3000  | 1.56666667 |
| chr12:45811806-45815806 | 4000  | 0.85       |
| chr12:46165806-46169806 | 4000  | 1.125      |
| chr13:1032001-1035001   | 3000  | 0.23333333 |
| chr13:1242001-1246001   | 4000  | 0.225      |
| chr13:1700001-1703001   | 3000  | 0.26666667 |
| chr13:1979001-1983001   | 4000  | 0.3        |
| chr13:2550001-2553001   | 3000  | 0.36666667 |
| chr13:3593001-3596001   | 3000  | 0.73333333 |
| chr13:4073001-4076001   | 3000  | 0.5        |
| chr13:4129001-4132001   | 3000  | 0.63333333 |
| chr13:4703001-4707001   | 4000  | 0.525      |
| chr13:5661001-5665001   | 4000  | 0.475      |
| chr13:5748001-5752001   | 4000  | 0.325      |
| chr13:6062001-6065001   | 3000  | 0.26666667 |
| chr13:7395001-7399001   | 4000  | 0.4        |
| chr13:7619001-7622001   | 3000  | 0.86666667 |
| chr13:8793001-8796001   | 3000  | 0.36666667 |
| chr13:8827001-8830001   | 3000  | 0.56666667 |
| chr13:11071001-11074001 | 3000  | 0.46666667 |
| chr13:11099001-11102001 | 3000  | 0.56666667 |
| chr13:11115001-11118001 | 3000  | 0.63333333 |
| chr13:11124001-11128001 | 4000  | 0.525      |
| chr13:13699001-13702001 | 3000  | 0.4        |
| chr13:13986001-13990001 | 4000  | 0.275      |
| chr13:14020001-14023001 | 3000  | 0.46666667 |
| chr13:14117001-14120001 | 3000  | 0.5        |
| chr13:14477001-14480001 | 3000  | 2.76666667 |
| chr13:14986001-14989001 | 3000  | 0.36666667 |
| chr13:15870001-15874001 | 4000  | 0.5        |
| chr13:17825001-17828001 | 3000  | 0.63333333 |
| chr13:20091001-20094001 | 3000  | 0.13333333 |
| chr13:20612001-20617001 | 5000  | 0.46       |
| chr13:20766001-20769001 | 3000  | 0.33333333 |
| chr13:20792001-20795001 | 3000  | 0.3        |
| chr13:20911001-20914001 | 3000  | 0.26666667 |
| chr13:21121001-21124001 | 3000  | 0.33333333 |
| chr13:21247001-21250001 | 3000  | 0.6        |
| chr13:21594001-21598001 | 4000  | 0.5        |
| chr13:21792001-21795001 | 3000  | 0.26666667 |
| chr13:22039001-22042001 | 3000  | 0.46666667 |
| chr13:22051001-22055001 | 4000  | 0.15       |

|                         |      |            |
|-------------------------|------|------------|
| chr13:22300001-22303001 | 3000 | 0.16666667 |
| chr13:23885001-23889001 | 4000 | 0.65       |
| chr13:24614001-24617001 | 3000 | 0.33333333 |
| chr13:24897001-24900001 | 3000 | 0.23333333 |
| chr13:24980001-24985001 | 5000 | 0.24       |
| chr13:25066001-25069001 | 3000 | 0.4        |
| chr13:25568001-25571001 | 3000 | 0.26666667 |
| chr13:25780001-25783001 | 3000 | 0.36666667 |
| chr13:26510001-26513001 | 3000 | 0.4        |
| chr13:26580001-26583001 | 3000 | 0.7        |
| chr13:27628001-27631001 | 3000 | 0.2        |
| chr13:29426001-29429001 | 3000 | 0.43333333 |
| chr13:29955001-29958001 | 3000 | 0.53333333 |
| chr13:30139001-30142001 | 3000 | 0.3        |
| chr13:35492001-35495001 | 3000 | 0.53333333 |
| chr13:35521001-35525001 | 4000 | 0.275      |
| chr13:43563001-43566001 | 3000 | 1.03333333 |
| chr13:43578001-43581001 | 3000 | 0.46666667 |
| chr13:43845001-43848001 | 3000 | 1.16666667 |
| chr13:45547796-45551796 | 4000 | 1.35       |
| chr13:50430711-50433711 | 3000 | 1.16666667 |
| chr13:50634711-50638711 | 4000 | 0.675      |
| chr13:50965711-50968711 | 3000 | 0.96666667 |
| chr13:51162711-51165711 | 3000 | 0.6        |
| chr13:51675711-51678711 | 3000 | 0.93333333 |
| chr13:51949711-51952711 | 3000 | 0.83333333 |
| chr13:52504711-52507711 | 3000 | 1.5        |
| chr13:52679711-52683711 | 4000 | 1.075      |
| chr13:53100711-53103711 | 3000 | 0.26666667 |
| chr13:54858711-54861711 | 3000 | 0.36666667 |
| chr13:55132711-55135711 | 3000 | 0.3        |
| chr13:55774711-55777711 | 3000 | 0.26666667 |
| chr13:57833711-57836711 | 3000 | 0.96666667 |
| chr13:58761711-58764711 | 3000 | 0.7        |
| chr13:61486711-61489711 | 3000 | 0.86666667 |
| chr13:61610711-61614711 | 4000 | 0.4        |
| chr13:62039711-62043711 | 4000 | 0.275      |
| chr13:62183711-62190711 | 7000 | 0.37142857 |
| chr13:62699711-62702711 | 3000 | 0.3        |
| chr13:64000711-64003711 | 3000 | 1.16666667 |
| chr13:64087711-64090711 | 3000 | 0.5        |
| chr13:65747711-65753711 | 6000 | 0.5        |
| chr13:67350711-67354711 | 4000 | 2.475      |
| chr13:67496711-67499711 | 3000 | 1.6        |
| chr13:73012978-73015978 | 3000 | 1.16666667 |
| chr13:73408978-73411978 | 3000 | 0.76666667 |
| chr13:73452978-73455978 | 3000 | 0.66666667 |
| chr13:73614978-73617978 | 3000 | 0.93333333 |
| chr13:73834978-73837978 | 3000 | 0.36666667 |
| chr13:74396978-74399978 | 3000 | 1.36666667 |
| chr13:74448978-74453978 | 5000 | 1.24       |
| chr13:74476978-74479978 | 3000 | 0.5        |
| chr13:74540978-74543978 | 3000 | 0.56666667 |

|                           |      |            |
|---------------------------|------|------------|
| chr13:75132978-75135978   | 3000 | 0.7        |
| chr13:75264978-75267978   | 3000 | 0.4        |
| chr13:75409978-75413978   | 4000 | 0.65       |
| chr13:77303978-77307978   | 4000 | 0.575      |
| chr13:77490978-77494978   | 4000 | 0.825      |
| chr13:78188978-78191978   | 3000 | 0.9        |
| chr13:79866978-79869978   | 3000 | 0.83333333 |
| chr13:80477978-80480978   | 3000 | 0.76666667 |
| chr13:80774978-80778978   | 4000 | 0.475      |
| chr13:83708978-83711978   | 3000 | 0.86666667 |
| chr13:85205346-85209346   | 4000 | 0.725      |
| chr13:85407346-85411346   | 4000 | 1          |
| chr13:85552346-85555346   | 3000 | 0.93333333 |
| chr13:88632175-88638175   | 6000 | 1.76666667 |
| chr13:88644175-88647175   | 3000 | 1.13333333 |
| chr13:89070175-89073175   | 3000 | 0.8        |
| chr13:89229175-89232175   | 3000 | 0.66666667 |
| chr13:89993444-89996444   | 3000 | 0.53333333 |
| chr13:90197444-90201444   | 4000 | 0.625      |
| chr13:90916444-90919444   | 3000 | 0.9        |
| chr13:98664444-98670444   | 6000 | 1.2        |
| chr13:98737444-98741444   | 4000 | 0.75       |
| chr13:98827444-98830444   | 3000 | 1.46666667 |
| chr13:99773291-99777291   | 4000 | 1.15       |
| chr13:101704291-101707291 | 3000 | 0.83333333 |
| chr13:101718291-101721291 | 3000 | 1.1        |
| chr13:105836291-105839291 | 3000 | 0.6        |
| chr13:108414850-108417850 | 3000 | 1.33333333 |
| chr13:108453850-108456850 | 3000 | 0.86666667 |
| chr13:108855850-108858850 | 3000 | 0.56666667 |
| chr13:109512850-109515850 | 3000 | 1.3        |
| chr13:109580850-109583850 | 3000 | 0.33333333 |
| chr13:109619850-109622850 | 3000 | 0.76666667 |
| chr13:109924850-109927850 | 3000 | 0.3        |
| chr13:110188850-110191850 | 3000 | 0.26666667 |
| chr13:110375850-110379850 | 4000 | 0.4        |
| chr14:789171-792171       | 3000 | 0.26666667 |
| chr14:914171-917171       | 3000 | 0.56666667 |
| chr14:4496512-4500512     | 4000 | 0.55       |
| chr14:6063512-6066512     | 3000 | 1          |
| chr14:8746512-8749512     | 3000 | 1.8        |
| chr14:9743512-9746512     | 3000 | 0.66666667 |
| chr14:9822512-9825512     | 3000 | 1.83333333 |
| chr14:9876512-9880512     | 4000 | 0.75       |
| chr14:11454844-11457844   | 3000 | 1.1        |
| chr14:12199844-12202844   | 3000 | 0.8        |
| chr14:12289844-12294844   | 5000 | 0.6        |
| chr14:12628844-12632844   | 4000 | 0.925      |
| chr14:13603844-13606844   | 3000 | 0.33333333 |
| chr14:14213844-14221844   | 8000 | 1.6375     |
| chr14:14730844-14733844   | 3000 | 0.36666667 |
| chr14:16310844-16313844   | 3000 | 1.13333333 |
| chr14:18368844-18371844   | 3000 | 1.2        |

|                         |      |            |
|-------------------------|------|------------|
| chr14:19202844-19205844 | 3000 | 0.96666667 |
| chr14:20034844-20037844 | 3000 | 0.6        |
| chr14:23249844-23255844 | 6000 | 0.6        |
| chr14:24238844-24242844 | 4000 | 0.325      |
| chr14:25161844-25164844 | 3000 | 0.4        |
| chr14:25456844-25459844 | 3000 | 0.53333333 |
| chr14:25541844-25544844 | 3000 | 0.66666667 |
| chr14:26361844-26364844 | 3000 | 0.73333333 |
| chr14:26812844-26815844 | 3000 | 0.6        |
| chr14:26855844-26858844 | 3000 | 0.4        |
| chr14:27064844-27067844 | 3000 | 0.56666667 |
| chr14:27270844-27273844 | 3000 | 0.46666667 |
| chr14:27274844-27277844 | 3000 | 0.26666667 |
| chr14:27283844-27286844 | 3000 | 0.63333333 |
| chr14:27477844-27482844 | 5000 | 0.36       |
| chr14:27634844-27637844 | 3000 | 0.6        |
| chr14:27902844-27905844 | 3000 | 0.86666667 |
| chr14:27996844-27999844 | 3000 | 0.36666667 |
| chr14:28145844-28148844 | 3000 | 0.63333333 |
| chr14:28418844-28422844 | 4000 | 0.475      |
| chr14:28589844-28592844 | 3000 | 0.63333333 |
| chr14:30594844-30598844 | 4000 | 0.275      |
| chr14:30685844-30688844 | 3000 | 0.26666667 |
| chr14:31093844-31096844 | 3000 | 0.6        |
| chr14:31315844-31318844 | 3000 | 0.4        |
| chr14:32394844-32397844 | 3000 | 0.46666667 |
| chr14:32684844-32687844 | 3000 | 0.76666667 |
| chr14:32689844-32693844 | 4000 | 0.525      |
| chr14:37145617-37148617 | 3000 | 1.16666667 |
| chr14:38217704-38220704 | 3000 | 0.8        |
| chr14:38532704-38536704 | 4000 | 0.6        |
| chr14:38817704-38821704 | 4000 | 0.25       |
| chr14:39209704-39212704 | 3000 | 0.53333333 |
| chr14:39368704-39372704 | 4000 | 0.6        |
| chr14:39446704-39449704 | 3000 | 0.46666667 |
| chr14:39761704-39764704 | 3000 | 0.33333333 |
| chr14:39948704-39951704 | 3000 | 0.9        |
| chr14:42853704-42857704 | 4000 | 0.775      |
| chr14:43136704-43139704 | 3000 | 1.4        |
| chr14:46574901-46577901 | 3000 | 1.06666667 |
| chr14:47835901-47839901 | 4000 | 0.35       |
| chr14:50836901-50840901 | 4000 | 0.2        |
| chr14:52118901-52121901 | 3000 | 0.3        |
| chr14:54412901-54416901 | 4000 | 0.25       |
| chr14:54661901-54664901 | 3000 | 0.66666667 |
| chr14:54691901-54694901 | 3000 | 0.5        |
| chr14:54889901-54892901 | 3000 | 0.2        |
| chr14:55111901-55114901 | 3000 | 0.4        |
| chr14:55272901-55275901 | 3000 | 0.3        |
| chr14:55566901-55569901 | 3000 | 0.23333333 |
| chr14:56066901-56070901 | 4000 | 0.525      |
| chr14:57432901-57435901 | 3000 | 0.76666667 |
| chr14:57575901-57579901 | 4000 | 0.55       |

|                         |      |            |
|-------------------------|------|------------|
| chr14:58006901-58009901 | 3000 | 0.33333333 |
| chr14:58389901-58392901 | 3000 | 0.3        |
| chr14:60157901-60160901 | 3000 | 0.56666667 |
| chr14:60506901-60509901 | 3000 | 0.43333333 |
| chr14:60531901-60535901 | 4000 | 0.375      |
| chr14:61351901-61354901 | 3000 | 0.7        |
| chr14:61501901-61506901 | 5000 | 0.86       |
| chr14:61549901-61552901 | 3000 | 0.43333333 |
| chr14:62034901-62037901 | 3000 | 1.03333333 |
| chr14:62115901-62119901 | 4000 | 0.4        |
| chr14:63159901-63164901 | 5000 | 0.64       |
| chr14:63208901-63211901 | 3000 | 1.2        |
| chr14:63217901-63220901 | 3000 | 1.16666667 |
| chr14:64599901-64605901 | 6000 | 0.71666667 |
| chr14:65718901-65727901 | 9000 | 0.63333333 |
| chr14:65906901-65910901 | 4000 | 0.825      |
| chr14:66120901-66123901 | 3000 | 1          |
| chr14:66251901-66254901 | 3000 | 0.43333333 |
| chr14:66276901-66281901 | 5000 | 0.92       |
| chr14:66445901-66448901 | 3000 | 0.5        |
| chr14:66980901-66983901 | 3000 | 0.26666667 |
| chr14:67638901-67641901 | 3000 | 0.66666667 |
| chr14:68198901-68201901 | 3000 | 0.53333333 |
| chr14:68547901-68550901 | 3000 | 0.4        |
| chr14:70124901-70127901 | 3000 | 0.66666667 |
| chr14:70529901-70533901 | 4000 | 0.6        |
| chr14:71282997-71285997 | 3000 | 0.36666667 |
| chr14:71982997-71986997 | 4000 | 0.875      |
| chr14:72353985-72358985 | 5000 | 0.88       |
| chr14:72757985-72760985 | 3000 | 0.63333333 |
| chr14:72767985-72770985 | 3000 | 0.63333333 |
| chr14:72892985-72895985 | 3000 | 0.76666667 |
| chr14:73396985-73399985 | 3000 | 0.53333333 |
| chr14:73701985-73704985 | 3000 | 0.66666667 |
| chr14:73771985-73775985 | 4000 | 0.425      |
| chr14:74267985-74273985 | 6000 | 0.56666667 |
| chr14:74279985-74283985 | 4000 | 0.575      |
| chr14:74919985-74922985 | 3000 | 0.4        |
| chr14:75258985-75264985 | 6000 | 0.55       |
| chr14:75404985-75407985 | 3000 | 0.46666667 |
| chr14:76332985-76335985 | 3000 | 0.36666667 |
| chr14:76449985-76453985 | 4000 | 0.675      |
| chr14:76454985-76457985 | 3000 | 0.7        |
| chr14:76613985-76616985 | 3000 | 0.96666667 |
| chr14:76793985-76797985 | 4000 | 0.3        |
| chr14:76852985-76855985 | 3000 | 1.76666667 |
| chr14:77132985-77135985 | 3000 | 0.6        |
| chr14:77656985-77659985 | 3000 | 1.16666667 |
| chr14:78062946-78065946 | 3000 | 0.66666667 |
| chr14:78955946-78960946 | 5000 | 0.42       |
| chr14:79439946-79443946 | 4000 | 1.075      |
| chr14:79500946-79506946 | 6000 | 1.43333333 |
| chr14:80805946-80808946 | 3000 | 1.06666667 |

|                           |      |            |
|---------------------------|------|------------|
| chr14:81115946-81119946   | 4000 | 1.025      |
| chr14:83028836-83033836   | 5000 | 0.76       |
| chr14:87735747-87738747   | 3000 | 1.56666667 |
| chr14:87755747-87759747   | 4000 | 1.325      |
| chr14:87983747-87987747   | 4000 | 0.375      |
| chr14:88112747-88115747   | 3000 | 1.26666667 |
| chr14:88477747-88481747   | 4000 | 0.175      |
| chr14:88510747-88513747   | 3000 | 0.3        |
| chr14:88669747-88672747   | 3000 | 0.73333333 |
| chr14:89265747-89268747   | 3000 | 0.53333333 |
| chr14:89717747-89720747   | 3000 | 0.63333333 |
| chr14:90508747-90511747   | 3000 | 0.6        |
| chr14:91107747-91110747   | 3000 | 0.6        |
| chr14:91531747-91535747   | 4000 | 0.45       |
| chr14:92930747-92934747   | 4000 | 1.425      |
| chr14:92947747-92951747   | 4000 | 0.65       |
| chr14:93394747-93397747   | 3000 | 0.96666667 |
| chr14:93427747-93431747   | 4000 | 0.65       |
| chr14:93445747-93449747   | 4000 | 0.55       |
| chr14:93506747-93509747   | 3000 | 0.83333333 |
| chr14:93746747-93749747   | 3000 | 0.7        |
| chr14:94039747-94042747   | 3000 | 0.56666667 |
| chr14:94458747-94461747   | 3000 | 0.53333333 |
| chr14:95219747-95223747   | 4000 | 0.5        |
| chr14:95784747-95790747   | 6000 | 0.48333333 |
| chr14:96317747-96320747   | 3000 | 0.43333333 |
| chr14:96458747-96461747   | 3000 | 0.43333333 |
| chr14:97450747-97454747   | 4000 | 1.15       |
| chr14:97746747-97750747   | 4000 | 1.35       |
| chr14:97809747-97812747   | 3000 | 0.46666667 |
| chr14:98801632-98804632   | 3000 | 0.56666667 |
| chr14:98840632-98843632   | 3000 | 0.5        |
| chr14:99092632-99095632   | 3000 | 0.36666667 |
| chr14:100010632-100013632 | 3000 | 0.96666667 |
| chr14:100189632-100192632 | 3000 | 0.93333333 |
| chr14:102510271-102513271 | 3000 | 0.86666667 |
| chr14:105468879-105471879 | 3000 | 0.46666667 |
| chr14:107155879-107160879 | 5000 | 0.64       |
| chr14:108731879-108735879 | 4000 | 0.25       |
| chr14:108764879-108767879 | 3000 | 0.7        |
| chr15:960001-963001       | 3000 | 0.33333333 |
| chr15:1841001-1845001     | 4000 | 0.9        |
| chr15:5256911-5259911     | 3000 | 0.3        |
| chr15:5491911-5494911     | 3000 | 0.76666667 |
| chr15:5704663-5708663     | 4000 | 1.75       |
| chr15:7006663-7009663     | 3000 | 0.53333333 |
| chr15:7789663-7792663     | 3000 | 0.33333333 |
| chr15:8215663-8218663     | 3000 | 0.4        |
| chr15:8252663-8255663     | 3000 | 0.53333333 |
| chr15:8283663-8286663     | 3000 | 0.7        |
| chr15:8486663-8490663     | 4000 | 0.75       |
| chr15:8580663-8583663     | 3000 | 1.8        |
| chr15:9702663-9707663     | 5000 | 1.38       |



|                         |      |            |
|-------------------------|------|------------|
| chr15:10229663-10232663 | 3000 | 0.46666667 |
| chr15:11181663-11186663 | 5000 | 0.52       |
| chr15:11710663-11713663 | 3000 | 0.6        |
| chr15:12373663-12376663 | 3000 | 0.33333333 |
| chr15:13144663-13148663 | 4000 | 0.3        |
| chr15:17504760-17507760 | 3000 | 1.13333333 |
| chr15:17572760-17576760 | 4000 | 0.525      |
| chr15:18123760-18126760 | 3000 | 0.56666667 |
| chr15:18250760-18253760 | 3000 | 0.83333333 |
| chr15:19386760-19389760 | 3000 | 0.43333333 |
| chr15:19657760-19660760 | 3000 | 0.5        |
| chr15:19725760-19728760 | 3000 | 0.46666667 |
| chr15:20237760-20240760 | 3000 | 0.73333333 |
| chr15:21015760-21018760 | 3000 | 1.1        |
| chr15:21729471-21732471 | 3000 | 1.16666667 |
| chr15:22031471-22034471 | 3000 | 0.46666667 |
| chr15:24125471-24128471 | 3000 | 1.76666667 |
| chr15:24342471-24345471 | 3000 | 1.8        |
| chr15:26603471-26608471 | 5000 | 0.34       |
| chr15:28432794-28435794 | 3000 | 0.83333333 |
| chr15:28908794-28911794 | 3000 | 0.63333333 |
| chr15:29038794-29041794 | 3000 | 0.46666667 |
| chr15:29201794-29205794 | 4000 | 0.5        |
| chr15:29274794-29277794 | 3000 | 0.33333333 |
| chr15:29467794-29470794 | 3000 | 0.53333333 |
| chr15:29586794-29589794 | 3000 | 0.26666667 |
| chr15:30402794-30405794 | 3000 | 0.46666667 |
| chr15:30882794-30885794 | 3000 | 0.33333333 |
| chr15:31009794-31012794 | 3000 | 0.83333333 |
| chr15:32064794-32067794 | 3000 | 0.6        |
| chr15:32069794-32072794 | 3000 | 1.56666667 |
| chr15:32076794-32080794 | 4000 | 0.875      |
| chr15:33443794-33447794 | 4000 | 1          |
| chr15:37308466-37311466 | 3000 | 1.2        |
| chr15:37813466-37816466 | 3000 | 1          |
| chr15:38012466-38015466 | 3000 | 1.6        |
| chr15:38062466-38066466 | 4000 | 0.375      |
| chr15:38180466-38183466 | 3000 | 0.6        |
| chr15:38275466-38278466 | 3000 | 0.33333333 |
| chr15:39093466-39096466 | 3000 | 0.9        |
| chr15:40389466-40392466 | 3000 | 0.76666667 |
| chr15:41184466-41188466 | 4000 | 0.625      |
| chr15:41799466-41802466 | 3000 | 1          |
| chr15:41886466-41890466 | 4000 | 0.575      |
| chr15:48068786-48071786 | 3000 | 0.63333333 |
| chr15:49003786-49006786 | 3000 | 0.63333333 |
| chr15:51514107-51517107 | 3000 | 0.63333333 |
| chr15:51680107-51683107 | 3000 | 0.76666667 |
| chr15:51776107-51779107 | 3000 | 0.23333333 |
| chr15:51842107-51846107 | 4000 | 0.925      |
| chr15:51887107-51890107 | 3000 | 0.63333333 |
| chr15:52557107-52562107 | 5000 | 0.42       |
| chr15:52700107-52703107 | 3000 | 0.8        |

|                         |      |            |
|-------------------------|------|------------|
| chr15:52796107-52799107 | 3000 | 0.46666667 |
| chr15:52895107-52898107 | 3000 | 0.63333333 |
| chr15:53090107-53093107 | 3000 | 0.9        |
| chr15:53207107-53210107 | 3000 | 0.26666667 |
| chr15:53642107-53645107 | 3000 | 0.66666667 |
| chr15:53737107-53740107 | 3000 | 0.76666667 |
| chr15:55034107-55037107 | 3000 | 0.5        |
| chr15:55101107-55104107 | 3000 | 0.56666667 |
| chr15:55150107-55154107 | 4000 | 0.6        |
| chr15:58615107-58619107 | 4000 | 0.825      |
| chr15:58683107-58686107 | 3000 | 1.03333333 |
| chr15:58792107-58795107 | 3000 | 0.63333333 |
| chr15:59302107-59307107 | 5000 | 1.02       |
| chr15:59568107-59571107 | 3000 | 0.46666667 |
| chr15:62275478-62278478 | 3000 | 0.6        |
| chr15:62315478-62318478 | 3000 | 0.43333333 |
| chr15:62325478-62328478 | 3000 | 0.6        |
| chr15:62620478-62623478 | 3000 | 0.43333333 |
| chr15:62692478-62696478 | 4000 | 0.325      |
| chr15:62974478-62978478 | 4000 | 0.9        |
| chr15:63755478-63759478 | 4000 | 0.4        |
| chr15:63784478-63787478 | 3000 | 0.56666667 |
| chr15:64004478-64007478 | 3000 | 0.4        |
| chr15:64059478-64062478 | 3000 | 0.3        |
| chr15:64069478-64073478 | 4000 | 0.525      |
| chr15:64339478-64344478 | 5000 | 0.42       |
| chr15:64589478-64593478 | 4000 | 0.25       |
| chr15:65647478-65650478 | 3000 | 0.3        |
| chr15:66005478-66009478 | 4000 | 0.575      |
| chr15:68542478-68545478 | 3000 | 0.66666667 |
| chr15:68552478-68555478 | 3000 | 0.33333333 |
| chr15:68590478-68594478 | 4000 | 0.625      |
| chr15:68623478-68626478 | 3000 | 1          |
| chr15:68798478-68801478 | 3000 | 0.56666667 |
| chr15:69012478-69015478 | 3000 | 0.36666667 |
| chr15:69211478-69214478 | 3000 | 0.76666667 |
| chr15:70638478-70641478 | 3000 | 0.43333333 |
| chr15:70718478-70721478 | 3000 | 0.46666667 |
| chr15:71244478-71247478 | 3000 | 0.5        |
| chr15:72101478-72104478 | 3000 | 0.3        |
| chr15:72293478-72296478 | 3000 | 0.66666667 |
| chr15:72889478-72892478 | 3000 | 0.56666667 |
| chr15:73676478-73680478 | 4000 | 0.225      |
| chr15:73690478-73693478 | 3000 | 0.1        |
| chr15:73806478-73810478 | 4000 | 0.575      |
| chr15:74231478-74235478 | 4000 | 0.575      |
| chr15:74513478-74516478 | 3000 | 0.23333333 |
| chr15:74734478-74738478 | 4000 | 0.525      |
| chr15:75252478-75256478 | 4000 | 0.3        |
| chr15:75445478-75448478 | 3000 | 0.56666667 |
| chr15:80747478-80752478 | 5000 | 0.4        |
| chr15:80943478-80946478 | 3000 | 0.26666667 |
| chr15:81716478-81719478 | 3000 | 1.4        |

|                           |      |            |
|---------------------------|------|------------|
| chr15:84742478-84745478   | 3000 | 0.36666667 |
| chr15:85024478-85027478   | 3000 | 0.76666667 |
| chr15:86222478-86225478   | 3000 | 0.86666667 |
| chr15:86524478-86527478   | 3000 | 0.8        |
| chr15:86859478-86862478   | 3000 | 0.86666667 |
| chr15:86963478-86967478   | 4000 | 0.75       |
| chr15:87699478-87703478   | 4000 | 1.1        |
| chr15:88070478-88073478   | 3000 | 1.36666667 |
| chr15:88792478-88795478   | 3000 | 0.53333333 |
| chr15:90225478-90229478   | 4000 | 0.525      |
| chr15:90767478-90770478   | 3000 | 0.63333333 |
| chr15:90994478-90997478   | 3000 | 0.86666667 |
| chr15:91404478-91407478   | 3000 | 0.3        |
| chr15:91442478-91446478   | 4000 | 0.675      |
| chr15:92859478-92862478   | 3000 | 0.56666667 |
| chr15:93384478-93388478   | 4000 | 0.6        |
| chr15:93567478-93571478   | 4000 | 0.125      |
| chr15:94184478-94187478   | 3000 | 1.03333333 |
| chr15:94312478-94316478   | 4000 | 0.25       |
| chr15:94539478-94544478   | 5000 | 0.36       |
| chr15:94774478-94777478   | 3000 | 0.73333333 |
| chr15:96118478-96121478   | 3000 | 0.5        |
| chr15:97336478-97339478   | 3000 | 0.76666667 |
| chr15:98243478-98246478   | 3000 | 0.6        |
| chr15:98298478-98301478   | 3000 | 1.13333333 |
| chr15:98866478-98870478   | 4000 | 0.95       |
| chr15:99256478-99262478   | 6000 | 0.88333333 |
| chr15:100079478-100083478 | 4000 | 0.675      |
| chr15:100197478-100200478 | 3000 | 0.86666667 |
| chr15:100713478-100720478 | 7000 | 0.8        |
| chr15:101206478-101209478 | 3000 | 0.6        |
| chr15:101359478-101362478 | 3000 | 0.56666667 |
| chr15:101514478-101519478 | 5000 | 0.26       |
| chr15:101680478-101684478 | 4000 | 1          |
| chr15:102263478-102266478 | 3000 | 0.73333333 |
| chr15:104991238-104994238 | 3000 | 0.53333333 |
| chr15:105058238-105061238 | 3000 | 0.53333333 |
| chr15:105077238-105080238 | 3000 | 0.73333333 |
| chr15:105349238-105352238 | 3000 | 1.3        |
| chr15:105805093-105808093 | 3000 | 1.53333333 |
| chr15:108297927-108301927 | 4000 | 0.7        |
| chr16:321001-325001       | 4000 | 0.525      |
| chr16:3276001-3279001     | 3000 | 0.93333333 |
| chr16:3897001-3900001     | 3000 | 2.4        |
| chr16:4630001-4633001     | 3000 | 0.9        |
| chr16:4654001-4657001     | 3000 | 1.36666667 |
| chr16:4672001-4676001     | 4000 | 0.775      |
| chr16:9387607-9390607     | 3000 | 1.43333333 |
| chr16:9391607-9394607     | 3000 | 1.33333333 |
| chr16:9465607-9469607     | 4000 | 1.025      |
| chr16:9472607-9475607     | 3000 | 0.7        |
| chr16:9841607-9845607     | 4000 | 1.05       |
| chr16:11885607-11888607   | 3000 | 0.43333333 |

|                         |      |            |
|-------------------------|------|------------|
| chr16:12251607-12255607 | 4000 | 0.35       |
| chr16:13592644-13597644 | 5000 | 0.78       |
| chr16:13902644-13905644 | 3000 | 0.66666667 |
| chr16:14317644-14320644 | 3000 | 0.7        |
| chr16:15574644-15577644 | 3000 | 0.5        |
| chr16:15656644-15659644 | 3000 | 0.46666667 |
| chr16:16706644-16710644 | 4000 | 0.45       |
| chr16:16805644-16809644 | 4000 | 0.625      |
| chr16:16882644-16887644 | 5000 | 0.38       |
| chr16:17030644-17033644 | 3000 | 0.8        |
| chr16:23692199-23695199 | 3000 | 0.7        |
| chr16:24415199-24420199 | 5000 | 0.46       |
| chr16:24978199-24981199 | 3000 | 0.5        |
| chr16:25008199-25011199 | 3000 | 0.7        |
| chr16:25792199-25796199 | 4000 | 0.425      |
| chr16:26189199-26194199 | 5000 | 0.36       |
| chr16:27270199-27273199 | 3000 | 1.23333333 |
| chr16:27379199-27383199 | 4000 | 1.175      |
| chr16:27556199-27560199 | 4000 | 0.8        |
| chr16:28624199-28627199 | 3000 | 1.3        |
| chr16:28854199-28858199 | 4000 | 0.175      |
| chr16:29084199-29089199 | 5000 | 0.3        |
| chr16:30310950-30313950 | 3000 | 0.83333333 |
| chr16:30844950-30847950 | 3000 | 0.9        |
| chr16:31449950-31453950 | 4000 | 1.175      |
| chr16:31650950-31653950 | 3000 | 0.76666667 |
| chr16:32673950-32676950 | 3000 | 0.43333333 |
| chr16:32984950-32988950 | 4000 | 0.5        |
| chr16:33010950-33015950 | 5000 | 0.3        |
| chr16:33174950-33177950 | 3000 | 0.73333333 |
| chr16:33296950-33299950 | 3000 | 0.33333333 |
| chr16:38125950-38128950 | 3000 | 0.36666667 |
| chr16:38724950-38727950 | 3000 | 0.33333333 |
| chr16:38792950-38795950 | 3000 | 0.56666667 |
| chr16:38805950-38808950 | 3000 | 0.53333333 |
| chr16:39399950-39402950 | 3000 | 0.66666667 |
| chr16:41229950-41232950 | 3000 | 1.23333333 |
| chr16:41264950-41268950 | 4000 | 0.65       |
| chr16:41456950-41459950 | 3000 | 0.63333333 |
| chr16:41603950-41606950 | 3000 | 0.3        |
| chr16:42013950-42018950 | 5000 | 0.54       |
| chr16:42846950-42849950 | 3000 | 0.2        |
| chr16:43162950-43165950 | 3000 | 0.4        |
| chr16:43195950-43198950 | 3000 | 0.7        |
| chr16:44495950-44498950 | 3000 | 0.4        |
| chr16:45897950-45902950 | 5000 | 0.36       |
| chr16:45989950-45992950 | 3000 | 0.46666667 |
| chr16:49701950-49706950 | 5000 | 0.68       |
| chr16:49977950-49980950 | 3000 | 0.43333333 |
| chr16:49985950-49988950 | 3000 | 1.1        |
| chr16:50312950-50315950 | 3000 | 1.1        |
| chr16:50418950-50421950 | 3000 | 1.6        |
| chr16:50822399-50825399 | 3000 | 0.8        |

|                         |      |            |
|-------------------------|------|------------|
| chr16:51449399-51453399 | 4000 | 0.575      |
| chr16:53296399-53299399 | 3000 | 0.36666667 |
| chr16:53450399-53453399 | 3000 | 0.26666667 |
| chr16:53469399-53473399 | 4000 | 0.65       |
| chr16:53571399-53574399 | 3000 | 0.33333333 |
| chr16:54199399-54204399 | 5000 | 1.04       |
| chr16:54838399-54841399 | 3000 | 0.5        |
| chr16:55770203-55773203 | 3000 | 0.9        |
| chr16:56750203-56753203 | 3000 | 0.5        |
| chr16:57170203-57174203 | 4000 | 0.425      |
| chr16:57244203-57248203 | 4000 | 0.575      |
| chr16:58278203-58282203 | 4000 | 0.35       |
| chr16:58688203-58691203 | 3000 | 0.66666667 |
| chr16:61378203-61382203 | 4000 | 1          |
| chr16:61639203-61643203 | 4000 | 1.05       |
| chr16:61648203-61651203 | 3000 | 0.76666667 |
| chr16:63013203-63019203 | 6000 | 1.05       |
| chr16:63244203-63248203 | 4000 | 0.7        |
| chr16:63691203-63694203 | 3000 | 0.63333333 |
| chr16:64413203-64416203 | 3000 | 0.43333333 |
| chr16:64726203-64729203 | 3000 | 0.8        |
| chr16:64853203-64856203 | 3000 | 1.3        |
| chr16:65308604-65311604 | 3000 | 0.83333333 |
| chr16:65407604-65410604 | 3000 | 0.93333333 |
| chr16:65849604-65852604 | 3000 | 0.53333333 |
| chr16:67467604-67470604 | 3000 | 0.53333333 |
| chr16:69774732-69777732 | 3000 | 0.63333333 |
| chr16:69858732-69861732 | 3000 | 1.26666667 |
| chr16:70235732-70238732 | 3000 | 0.73333333 |
| chr16:72211732-72214732 | 3000 | 1.23333333 |
| chr16:72262732-72265732 | 3000 | 0.66666667 |
| chr16:72724732-72727732 | 3000 | 0.96666667 |
| chr16:72996732-73000732 | 4000 | 1.575      |
| chr16:73201732-73205732 | 4000 | 1.05       |
| chr16:76179732-76184732 | 5000 | 1.08       |
| chr16:76533732-76536732 | 3000 | 0.46666667 |
| chr16:76773732-76776732 | 3000 | 0.83333333 |
| chr16:76888732-76892732 | 4000 | 0.725      |
| chr16:77419732-77422732 | 3000 | 0.53333333 |
| chr16:78177732-78180732 | 3000 | 0.7        |
| chr16:78459732-78462732 | 3000 | 0.4        |
| chr16:78733732-78738732 | 5000 | 0.62       |
| chr16:78799732-78802732 | 3000 | 0.56666667 |
| chr16:79406732-79409732 | 3000 | 1.06666667 |
| chr16:79768732-79771732 | 3000 | 1.33333333 |
| chr16:79772732-79777732 | 5000 | 0.96       |
| chr16:79802732-79806732 | 4000 | 0.7        |
| chr16:80093732-80097732 | 4000 | 0.55       |
| chr16:80262732-80265732 | 3000 | 1.03333333 |
| chr16:80412732-80415732 | 3000 | 1.26666667 |
| chr16:80567732-80570732 | 3000 | 1.43333333 |
| chr16:80974158-80978158 | 4000 | 0.8        |
| chr16:82177158-82180158 | 3000 | 1.36666667 |

|                         |      |            |
|-------------------------|------|------------|
| chr16:82233158-82238158 | 5000 | 0.8        |
| chr16:82490158-82496158 | 6000 | 1.1        |
| chr16:82554158-82558158 | 4000 | 1.325      |
| chr16:83600319-83604319 | 4000 | 1.15       |
| chr16:83719712-83722712 | 3000 | 1.36666667 |
| chr16:83999712-84002712 | 3000 | 0.8        |
| chr16:84101712-84104712 | 3000 | 0.83333333 |
| chr16:84847712-84851712 | 4000 | 0.85       |
| chr16:84979712-84982712 | 3000 | 0.86666667 |
| chr16:85449712-85452712 | 3000 | 1.23333333 |
| chr16:85589712-85592712 | 3000 | 1.03333333 |
| chr16:85816712-85820712 | 4000 | 0.775      |
| chr16:85827712-85831712 | 4000 | 1          |
| chr16:85856712-85859712 | 3000 | 0.83333333 |
| chr16:86500712-86503712 | 3000 | 1.36666667 |
| chr16:86606712-86609712 | 3000 | 0.3        |
| chr16:86777712-86783712 | 6000 | 0.78333333 |
| chr16:88812712-88815712 | 3000 | 0.26666667 |
| chr16:89023712-89026712 | 3000 | 0.43333333 |
| chr16:89876712-89880712 | 4000 | 0.4        |
| chr17:164001-167001     | 3000 | 0.6        |
| chr17:264001-268001     | 4000 | 1.375      |
| chr17:299001-302001     | 3000 | 0.8        |
| chr17:407001-410001     | 3000 | 0.53333333 |
| chr17:634001-638001     | 4000 | 0.55       |
| chr17:853950-856950     | 3000 | 1.03333333 |
| chr17:853950-856950     | 3000 | 1.03333333 |
| chr17:903950-906950     | 3000 | 0.46666667 |
| chr17:950950-953950     | 3000 | 1.13333333 |
| chr17:1001950-1004950   | 3000 | 0.83333333 |
| chr17:1056950-1061950   | 5000 | 0.54       |
| chr17:1151950-1156950   | 5000 | 0.5        |
| chr17:1256950-1260950   | 4000 | 0.4        |
| chr17:1333950-1337950   | 4000 | 0.65       |
| chr17:1483950-1486950   | 3000 | 0.6        |
| chr17:1869950-1873950   | 4000 | 0.5        |
| chr17:2076950-2079950   | 3000 | 0.33333333 |
| chr17:2076950-2079950   | 3000 | 0.33333333 |
| chr17:2510950-2516950   | 6000 | 0.51666667 |
| chr17:2830950-2833950   | 3000 | 0.56666667 |
| chr17:2846950-2853950   | 7000 | 1.05714286 |
| chr17:2992950-2995950   | 3000 | 0.83333333 |
| chr17:3034950-3037950   | 3000 | 0.63333333 |
| chr17:3054950-3057950   | 3000 | 1.26666667 |
| chr17:3069950-3072950   | 3000 | 0.4        |
| chr17:3102950-3105950   | 3000 | 1.03333333 |
| chr17:3444950-3447950   | 3000 | 0.36666667 |
| chr17:3444950-3447950   | 3000 | 0.36666667 |
| chr17:3490950-3495950   | 5000 | 0.68       |
| chr17:3682950-3686950   | 4000 | 1.2        |
| chr17:3694950-3699950   | 5000 | 1          |
| chr17:3694950-3699950   | 5000 | 1          |
| chr17:3721950-3724950   | 3000 | 0.9        |

|                         |      |            |
|-------------------------|------|------------|
| chr17:4052950-4055950   | 3000 | 0.2        |
| chr17:4057950-4060950   | 3000 | 0.76666667 |
| chr17:4062950-4065950   | 3000 | 0.5        |
| chr17:4062950-4065950   | 3000 | 0.5        |
| chr17:4270950-4273950   | 3000 | 0.63333333 |
| chr17:5028950-5031950   | 3000 | 0.76666667 |
| chr17:5247950-5250950   | 3000 | 0.26666667 |
| chr17:5247950-5250950   | 3000 | 0.26666667 |
| chr17:5287950-5290950   | 3000 | 0.5        |
| chr17:5559950-5563950   | 4000 | 0.425      |
| chr17:10449950-10452950 | 3000 | 1.23333333 |
| chr17:10696950-10699950 | 3000 | 1.6        |
| chr17:11402950-11405950 | 3000 | 1.93333333 |
| chr17:11787950-11790950 | 3000 | 1.36666667 |
| chr17:11787950-11790950 | 3000 | 1.36666667 |
| chr17:12835950-12838950 | 3000 | 1.73333333 |
| chr17:12884950-12887950 | 3000 | 1.33333333 |
| chr17:12905950-12909950 | 4000 | 0.975      |
| chr17:13113950-13116950 | 3000 | 1.7        |
| chr17:13162950-13165950 | 3000 | 1.46666667 |
| chr17:13310950-13314950 | 4000 | 0.675      |
| chr17:13354950-13358950 | 4000 | 0.875      |
| chr17:13546950-13552950 | 6000 | 1.51666667 |
| chr17:14281950-14284950 | 3000 | 1.6        |
| chr17:16465777-16468777 | 3000 | 1.36666667 |
| chr17:16745777-16749777 | 4000 | 1.525      |
| chr17:16839777-16842777 | 3000 | 1.46666667 |
| chr17:16839777-16842777 | 3000 | 1.46666667 |
| chr17:16859777-16862777 | 3000 | 1.4        |
| chr17:16859777-16862777 | 3000 | 1.4        |
| chr17:16892777-16895777 | 3000 | 1.5        |
| chr17:16892777-16895777 | 3000 | 1.5        |
| chr17:16900777-16904777 | 4000 | 1.675      |
| chr17:16984777-16988777 | 4000 | 1.775      |
| chr17:16984777-16988777 | 4000 | 1.775      |
| chr17:17569777-17573777 | 4000 | 0.775      |
| chr17:18612777-18615777 | 3000 | 0.8        |
| chr17:22340641-22344641 | 4000 | 1.975      |
| chr17:22340641-22344641 | 4000 | 1.975      |
| chr17:22729861-22732861 | 3000 | 1.63333333 |
| chr17:22833861-22836861 | 3000 | 1.1        |
| chr17:23183861-23189861 | 6000 | 0.6        |
| chr17:24179861-24183861 | 4000 | 0.825      |
| chr17:26455861-26458861 | 3000 | 1.06666667 |
| chr17:26455861-26458861 | 3000 | 1.06666667 |
| chr17:26631861-26636861 | 5000 | 1.08       |
| chr17:27962861-27965861 | 3000 | 1.06666667 |
| chr17:28231861-28236861 | 5000 | 0.42       |
| chr17:28384775-28387775 | 3000 | 0.73333333 |
| chr17:28384775-28387775 | 3000 | 0.73333333 |
| chr17:28779775-28783775 | 4000 | 1          |
| chr17:28984775-28989775 | 5000 | 0.92       |
| chr17:28984775-28989775 | 5000 | 0.92       |

|                         |      |            |
|-------------------------|------|------------|
| chr17:29060775-29063775 | 3000 | 1          |
| chr17:29060775-29063775 | 3000 | 1          |
| chr17:29270775-29274775 | 4000 | 0.55       |
| chr17:29461775-29465775 | 4000 | 1.55       |
| chr17:29489775-29492775 | 3000 | 2.73333333 |
| chr17:30503775-30507775 | 4000 | 0.575      |
| chr17:30540775-30543775 | 3000 | 1.03333333 |
| chr17:31123775-31126775 | 3000 | 0.36666667 |
| chr17:31127775-31130775 | 3000 | 1.2        |
| chr17:31302775-31306775 | 4000 | 1          |
| chr17:31638775-31641775 | 3000 | 0.56666667 |
| chr17:31666775-31669775 | 3000 | 0.76666667 |
| chr17:31754775-31757775 | 3000 | 1          |
| chr17:31781775-31784775 | 3000 | 0.63333333 |
| chr17:31938775-31942775 | 4000 | 1.125      |
| chr17:31971775-31974775 | 3000 | 1.03333333 |
| chr17:32008775-32011775 | 3000 | 0.8        |
| chr17:33721775-33724775 | 3000 | 1.06666667 |
| chr17:33923775-33928775 | 5000 | 0.48       |
| chr17:33929775-33933775 | 4000 | 0.725      |
| chr17:34026775-34029775 | 3000 | 0.9        |
| chr17:34243775-34246775 | 3000 | 0.76666667 |
| chr17:34368775-34371775 | 3000 | 0.8        |
| chr17:34483775-34488775 | 5000 | 0.42       |
| chr17:34516775-34520775 | 4000 | 1.025      |
| chr17:34535775-34538775 | 3000 | 1.2        |
| chr17:34535775-34538775 | 3000 | 1.2        |
| chr17:35130775-35133775 | 3000 | 0.8        |
| chr17:35742775-35745775 | 3000 | 0.3        |
| chr17:35742775-35745775 | 3000 | 0.3        |
| chr17:35803775-35807775 | 4000 | 0.95       |
| chr17:35863775-35866775 | 3000 | 0.26666667 |
| chr17:35925775-35929775 | 4000 | 0.55       |
| chr17:36014775-36018775 | 4000 | 0.65       |
| chr17:36069775-36073775 | 4000 | 0.625      |
| chr17:36191775-36194775 | 3000 | 1.03333333 |
| chr17:36205775-36208775 | 3000 | 1.23333333 |
| chr17:36205775-36208775 | 3000 | 1.23333333 |
| chr17:36463775-36466775 | 3000 | 0.46666667 |
| chr17:36468775-36472775 | 4000 | 0.875      |
| chr17:36537775-36540775 | 3000 | 0.83333333 |
| chr17:36605775-36609775 | 4000 | 1.225      |
| chr17:36605775-36609775 | 4000 | 1.225      |
| chr17:36707775-36711775 | 4000 | 0.7        |
| chr17:36759775-36762775 | 3000 | 0.56666667 |
| chr17:37603176-37606176 | 3000 | 0.26666667 |
| chr17:37732176-37735176 | 3000 | 0.63333333 |
| chr17:37740176-37743176 | 3000 | 0.63333333 |
| chr17:37740176-37743176 | 3000 | 0.63333333 |
| chr17:37782176-37785176 | 3000 | 0.7        |
| chr17:37805176-37808176 | 3000 | 0.53333333 |
| chr17:37827176-37830176 | 3000 | 0.63333333 |
| chr17:37863176-37869176 | 6000 | 0.56666667 |



|                         |      |            |
|-------------------------|------|------------|
| chr17:38169176-38174176 | 5000 | 0.68       |
| chr17:38169176-38174176 | 5000 | 0.68       |
| chr17:38189176-38193176 | 4000 | 0.975      |
| chr17:38407176-38412176 | 5000 | 0.5        |
| chr17:38407176-38412176 | 5000 | 0.5        |
| chr17:39344176-39347176 | 3000 | 1.03333333 |
| chr17:39344176-39347176 | 3000 | 1.03333333 |
| chr17:39609176-39612176 | 3000 | 0.9        |
| chr17:39668176-39672176 | 4000 | 0.6        |
| chr17:39686176-39689176 | 3000 | 1          |
| chr17:39870176-39873176 | 3000 | 0.6        |
| chr17:40344176-40347176 | 3000 | 0.76666667 |
| chr17:40593176-40598176 | 5000 | 0.64       |
| chr17:40754176-40757176 | 3000 | 0.43333333 |
| chr17:43645176-43648176 | 3000 | 0.46666667 |
| chr17:43771176-43774176 | 3000 | 0.6        |
| chr17:44176176-44180176 | 4000 | 0.425      |
| chr17:45392176-45395176 | 3000 | 0.56666667 |
| chr17:45621176-45626176 | 5000 | 0.46       |
| chr17:46469176-46472176 | 3000 | 0.23333333 |
| chr17:46548176-46551176 | 3000 | 0.2        |
| chr17:46847176-46850176 | 3000 | 0.36666667 |
| chr17:46853176-46856176 | 3000 | 0.43333333 |
| chr17:46858176-46861176 | 3000 | 1.83333333 |
| chr17:51124473-51127473 | 3000 | 1.2        |
| chr17:51869473-51872473 | 3000 | 0.26666667 |
| chr17:51878473-51882473 | 4000 | 0.5        |
| chr17:51883473-51886473 | 3000 | 0.26666667 |
| chr17:52106473-52109473 | 3000 | 0.36666667 |
| chr17:53164473-53167473 | 3000 | 0.53333333 |
| chr17:53351473-53354473 | 3000 | 0.66666667 |
| chr17:54029473-54032473 | 3000 | 0.66666667 |
| chr17:54468473-54472473 | 4000 | 0.35       |
| chr17:54783473-54788473 | 5000 | 0.78       |
| chr17:55047473-55050473 | 3000 | 0.26666667 |
| chr17:55114473-55117473 | 3000 | 0.53333333 |
| chr17:55664473-55668473 | 4000 | 0.475      |
| chr17:56680473-56683473 | 3000 | 0.8        |
| chr17:56949473-56952473 | 3000 | 0.33333333 |
| chr17:57124473-57127473 | 3000 | 0.4        |
| chr17:57375473-57378473 | 3000 | 0.4        |
| chr17:57486473-57489473 | 3000 | 0.33333333 |
| chr17:57919473-57922473 | 3000 | 0.53333333 |
| chr17:58485473-58488473 | 3000 | 0.3        |
| chr17:58944473-58947473 | 3000 | 0.66666667 |
| chr17:62020079-62023079 | 3000 | 1.16666667 |
| chr17:62989079-62992079 | 3000 | 0.63333333 |
| chr17:62993079-62996079 | 3000 | 0.73333333 |
| chr17:63002079-63006079 | 4000 | 0.5        |
| chr17:63375079-63378079 | 3000 | 0.63333333 |
| chr17:63389079-63392079 | 3000 | 0.96666667 |
| chr17:63441079-63444079 | 3000 | 1.5        |
| chr17:63951079-63955079 | 4000 | 1.275      |

|                         |      |            |
|-------------------------|------|------------|
| chr17:65045079-65048079 | 3000 | 0.83333333 |
| chr17:66076079-66079079 | 3000 | 0.7        |
| chr17:66191079-66195079 | 4000 | 0.575      |
| chr17:70033896-70036896 | 3000 | 0.5        |
| chr17:73437616-73441616 | 4000 | 0.55       |
| chr17:73611616-73614616 | 3000 | 0.93333333 |
| chr17:74164616-74167616 | 3000 | 0.76666667 |
| chr17:75210616-75215616 | 5000 | 0.56       |
| chr17:76371616-76377616 | 6000 | 0.63333333 |
| chr17:76395616-76398616 | 3000 | 0.73333333 |
| chr17:76699616-76702616 | 3000 | 0.3        |
| chr17:77150616-77153616 | 3000 | 0.63333333 |
| chr17:80876616-80879616 | 3000 | 0.33333333 |
| chr17:81647616-81650616 | 3000 | 0.23333333 |
| chr17:81978616-81981616 | 3000 | 0.66666667 |
| chr17:82129616-82133616 | 4000 | 1.075      |
| chr17:89627279-89630279 | 3000 | 0.56666667 |
| chr17:89821279-89824279 | 3000 | 1.06666667 |
| chr17:91032279-91037279 | 5000 | 0.46       |
| chr17:91128279-91133279 | 5000 | 0.38       |
| chr17:91339279-91342279 | 3000 | 0.93333333 |
| chr17:91368279-91371279 | 3000 | 0.56666667 |
| chr17:95829279-95832279 | 3000 | 0.6        |
| chr17:95978279-95981279 | 3000 | 0.36666667 |
| chr17:96055279-96058279 | 3000 | 1.03333333 |
| chr18:929001-932001     | 3000 | 0.23333333 |
| chr18:2794263-2798263   | 4000 | 0.425      |
| chr18:5198485-5202485   | 4000 | 1.025      |
| chr18:5683485-5687485   | 4000 | 0.875      |
| chr18:7017485-7023485   | 6000 | 0.53333333 |
| chr18:7199485-7203485   | 4000 | 0.85       |
| chr18:8442485-8446485   | 4000 | 0.45       |
| chr18:8873485-8876485   | 3000 | 0.2        |
| chr18:8950485-8954485   | 4000 | 0.525      |
| chr18:9511485-9514485   | 3000 | 0.36666667 |
| chr18:9966485-9969485   | 3000 | 0.43333333 |
| chr18:11197485-11200485 | 3000 | 0.33333333 |
| chr18:13727841-13730841 | 3000 | 1          |
| chr18:17804841-17808841 | 4000 | 0.5        |
| chr18:18285841-18288841 | 3000 | 0.63333333 |
| chr18:18353841-18357841 | 4000 | 0.25       |
| chr18:18907841-18910841 | 3000 | 0.56666667 |
| chr18:19512841-19515841 | 3000 | 0.43333333 |
| chr18:19877841-19880841 | 3000 | 0.43333333 |
| chr18:20175841-20179841 | 4000 | 0.425      |
| chr18:21319841-21322841 | 3000 | 0.7        |
| chr18:21610841-21614841 | 4000 | 0.85       |
| chr18:22718841-22721841 | 3000 | 0.66666667 |
| chr18:23568841-23571841 | 3000 | 0.6        |
| chr18:23775841-23778841 | 3000 | 0.56666667 |
| chr18:23983841-23986841 | 3000 | 0.6        |
| chr18:25254841-25258841 | 4000 | 0.65       |
| chr18:26216841-26219841 | 3000 | 1.06666667 |

|                         |      |            |
|-------------------------|------|------------|
| chr18:29837571-29840571 | 3000 | 0.56666667 |
| chr18:30443571-30446571 | 3000 | 0.6        |
| chr18:30497571-30502571 | 5000 | 0.28       |
| chr18:33200986-33204986 | 4000 | 0.875      |
| chr18:33484986-33488986 | 4000 | 0.4        |
| chr18:34179986-34183986 | 4000 | 0.225      |
| chr18:34197986-34200986 | 3000 | 0.43333333 |
| chr18:34487986-34490986 | 3000 | 0.5        |
| chr18:36357986-36360986 | 3000 | 0.33333333 |
| chr18:36644986-36647986 | 3000 | 1          |
| chr18:36803986-36806986 | 3000 | 0.7        |
| chr18:37081986-37084986 | 3000 | 0.5        |
| chr18:39445986-39449986 | 4000 | 0.35       |
| chr18:39731961-39735961 | 4000 | 0.75       |
| chr18:40300961-40304961 | 4000 | 0.95       |
| chr18:40318961-40322961 | 4000 | 0.575      |
| chr18:41085961-41089961 | 4000 | 1.5        |
| chr18:41125961-41128961 | 3000 | 0.46666667 |
| chr18:43102961-43105961 | 3000 | 0.4        |
| chr18:43683961-43686961 | 3000 | 0.5        |
| chr18:44261961-44264961 | 3000 | 0.43333333 |
| chr18:44294961-44297961 | 3000 | 0.4        |
| chr18:44420961-44424961 | 4000 | 0.55       |
| chr18:44631961-44636961 | 5000 | 0.58       |
| chr18:46720451-46724451 | 4000 | 0.45       |
| chr18:47153451-47156451 | 3000 | 0.36666667 |
| chr18:47633451-47636451 | 3000 | 0.6        |
| chr18:47818451-47821451 | 3000 | 0.96666667 |
| chr18:48033451-48037451 | 4000 | 0.65       |
| chr18:48115451-48119451 | 4000 | 1.25       |
| chr18:51005451-51010451 | 5000 | 0.78       |
| chr18:51947451-51953451 | 6000 | 0.45       |
| chr18:53264451-53270451 | 6000 | 0.65       |
| chr18:53571451-53574451 | 3000 | 1.4        |
| chr18:54077451-54084451 | 7000 | 0.87142857 |
| chr18:54895451-54898451 | 3000 | 1.06666667 |
| chr18:55010451-55013451 | 3000 | 0.5        |
| chr18:55082451-55087451 | 5000 | 0.42       |
| chr18:55718451-55722451 | 4000 | 0.45       |
| chr18:55928451-55931451 | 3000 | 0.86666667 |
| chr18:56023451-56027451 | 4000 | 0.575      |
| chr18:56248451-56251451 | 3000 | 1          |
| chr18:56344451-56347451 | 3000 | 0.3        |
| chr18:58783159-58788159 | 5000 | 0.46       |
| chr18:58907159-58910159 | 3000 | 1.2        |
| chr18:59683159-59686159 | 3000 | 1.4        |
| chr18:59709159-59712159 | 3000 | 0.7        |
| chr18:63189418-63192418 | 3000 | 0.96666667 |
| chr18:64674418-64677418 | 3000 | 1.1        |
| chr18:64707418-64710418 | 3000 | 0.8        |
| chr18:64718418-64722418 | 4000 | 0.95       |
| chr18:64949418-64953418 | 4000 | 1.1        |
| chr18:65352418-65356418 | 4000 | 1.15       |

|                         |      |            |
|-------------------------|------|------------|
| chr18:67475418-67478418 | 3000 | 0.4        |
| chr18:68202418-68206418 | 4000 | 0.6        |
| chr18:70114418-70117418 | 3000 | 1.43333333 |
| chr18:70263418-70267418 | 4000 | 1.775      |
| chr18:70281418-70284418 | 3000 | 0.56666667 |
| chr18:70329418-70332418 | 3000 | 1.2        |
| chr18:71108418-71111418 | 3000 | 0.8        |
| chr18:71205418-71208418 | 3000 | 0.33333333 |
| chr18:72581418-72584418 | 3000 | 0.76666667 |
| chr18:73578418-73581418 | 3000 | 1.03333333 |
| chr18:75578418-75581418 | 3000 | 0.63333333 |
| chr18:75727418-75731418 | 4000 | 1.15       |
| chr18:76230418-76233418 | 3000 | 0.73333333 |
| chr18:76861418-76864418 | 3000 | 0.5        |
| chr18:77284418-77287418 | 3000 | 1.5        |
| chr18:78190418-78193418 | 3000 | 0.86666667 |
| chr18:78391418-78394418 | 3000 | 0.66666667 |
| chr18:78401418-78404418 | 3000 | 1.23333333 |
| chr18:78576418-78581418 | 5000 | 1.08       |
| chr18:80233418-80236418 | 3000 | 0.6        |
| chr18:80469418-80472418 | 3000 | 1.33333333 |
| chr18:80658418-80661418 | 3000 | 1.56666667 |
| chr18:80937418-80940418 | 3000 | 0.7        |
| chr18:80949418-80952418 | 3000 | 1.46666667 |
| chr18:81147418-81150418 | 3000 | 0.6        |
| chr18:81733418-81736418 | 3000 | 0.43333333 |
| chr18:81804418-81807418 | 3000 | 0.56666667 |
| chr18:82141418-82145418 | 4000 | 0.7        |
| chr18:82671418-82674418 | 3000 | 0.7        |
| chr18:82706418-82709418 | 3000 | 0.73333333 |
| chr18:82880418-82886418 | 6000 | 0.36666667 |
| chr18:82933418-82936418 | 3000 | 0.3        |
| chr18:84393418-84398418 | 5000 | 0.26       |
| chr18:85172418-85175418 | 3000 | 0.33333333 |
| chr18:85183418-85188418 | 5000 | 0.6        |
| chr18:85362418-85365418 | 3000 | 0.46666667 |
| chr18:85589418-85592418 | 3000 | 0.66666667 |
| chr18:86208418-86211418 | 3000 | 0.43333333 |
| chr18:87055418-87058418 | 3000 | 1.03333333 |
| chr19:1675004-1678004   | 3000 | 0.4        |
| chr19:1794004-1797004   | 3000 | 0.5        |
| chr19:1809004-1812004   | 3000 | 0.36666667 |
| chr19:3626004-3632004   | 6000 | 0.66666667 |
| chr19:3726004-3730004   | 4000 | 0.45       |
| chr19:4377004-4380004   | 3000 | 0.46666667 |
| chr19:5119004-5123004   | 4000 | 0.65       |
| chr19:6206861-6209861   | 3000 | 0.53333333 |
| chr19:6804861-6807861   | 3000 | 0.66666667 |
| chr19:6899861-6903861   | 4000 | 0.6        |
| chr19:7962861-7965861   | 3000 | 0.46666667 |
| chr19:8063861-8066861   | 3000 | 0.96666667 |
| chr19:8429861-8432861   | 3000 | 0.56666667 |
| chr19:8674861-8678861   | 4000 | 0.775      |

|                         |      |            |
|-------------------------|------|------------|
| chr19:8723861-8726861   | 3000 | 0.2        |
| chr19:9147861-9150861   | 3000 | 1.06666667 |
| chr19:12037585-12041585 | 4000 | 0.725      |
| chr19:12547585-12550585 | 3000 | 1.03333333 |
| chr19:12594585-12597585 | 3000 | 0.63333333 |
| chr19:12703585-12706585 | 3000 | 0.83333333 |
| chr19:13102585-13105585 | 3000 | 0.63333333 |
| chr19:13167585-13170585 | 3000 | 0.9        |
| chr19:13186585-13189585 | 3000 | 1.3        |
| chr19:13228585-13232585 | 4000 | 0.525      |
| chr19:17852414-17857414 | 5000 | 1.04       |
| chr19:18021414-18024414 | 3000 | 0.46666667 |
| chr19:18236414-18239414 | 3000 | 0.43333333 |
| chr19:18651414-18655414 | 4000 | 0.725      |
| chr19:18660414-18663414 | 3000 | 1.33333333 |
| chr19:18843414-18846414 | 3000 | 1.1        |
| chr19:19141414-19144414 | 3000 | 0.83333333 |
| chr19:19638414-19641414 | 3000 | 0.43333333 |
| chr19:21106563-21110563 | 4000 | 0.9        |
| chr19:21309563-21313563 | 4000 | 0.95       |
| chr19:21382563-21386563 | 4000 | 0.7        |
| chr19:26399352-26402352 | 3000 | 1.16666667 |
| chr19:28220352-28223352 | 3000 | 0.53333333 |
| chr19:28366352-28369352 | 3000 | 0.73333333 |
| chr19:28631352-28634352 | 3000 | 0.86666667 |
| chr19:31673352-31676352 | 3000 | 1          |
| chr19:32032352-32037352 | 5000 | 0.52       |
| chr19:32888352-32891352 | 3000 | 0.36666667 |
| chr19:32940352-32944352 | 4000 | 0.525      |
| chr19:33118352-33121352 | 3000 | 0.23333333 |
| chr19:33197352-33200352 | 3000 | 0.56666667 |
| chr19:33412352-33416352 | 4000 | 0.4        |
| chr19:33674352-33678352 | 4000 | 0.475      |
| chr19:34118352-34121352 | 3000 | 0.56666667 |
| chr19:34702352-34706352 | 4000 | 0.35       |
| chr19:48099781-48104781 | 5000 | 1.28       |
| chr19:48182781-48185781 | 3000 | 2.16666667 |
| chr19:48198781-48201781 | 3000 | 1.03333333 |
| chr19:56157507-56160507 | 3000 | 1.63333333 |
| chr2:166001-169001      | 3000 | 0.3        |
| chr2:1180001-1183001    | 3000 | 0.43333333 |
| chr2:1242001-1245001    | 3000 | 0.46666667 |
| chr2:2047001-2050001    | 3000 | 0.2        |
| chr2:3337001-3340001    | 3000 | 0.53333333 |
| chr2:6292001-6295001    | 3000 | 0.56666667 |
| chr2:7179001-7182001    | 3000 | 0.43333333 |
| chr2:7412001-7415001    | 3000 | 0.3        |
| chr2:7489001-7494001    | 5000 | 0.42       |
| chr2:7626001-7630001    | 4000 | 0.7        |
| chr2:7809001-7812001    | 3000 | 0.4        |
| chr2:8442001-8445001    | 3000 | 0.6        |
| chr2:8789001-8792001    | 3000 | 0.7        |
| chr2:9884001-9888001    | 4000 | 1.05       |

|                        |      |            |
|------------------------|------|------------|
| chr2:10378001-10381001 | 3000 | 1.76666667 |
| chr2:10531001-10536001 | 5000 | 0.46       |
| chr2:11276001-11279001 | 3000 | 0.5        |
| chr2:12805001-12809001 | 4000 | 0.725      |
| chr2:14403001-14406001 | 3000 | 0.1        |
| chr2:15217001-15221001 | 4000 | 0.425      |
| chr2:15492001-15495001 | 3000 | 0.53333333 |
| chr2:18909001-18912001 | 3000 | 0.33333333 |
| chr2:19666001-19669001 | 3000 | 0.43333333 |
| chr2:19687001-19694001 | 7000 | 0.5        |
| chr2:20848001-20854001 | 6000 | 0.46666667 |
| chr2:21513001-21516001 | 3000 | 1.06666667 |
| chr2:22403001-22407001 | 4000 | 0.525      |
| chr2:23312001-23315001 | 3000 | 0.73333333 |
| chr2:25489001-25492001 | 3000 | 0.7        |
| chr2:27997019-28000019 | 3000 | 1.13333333 |
| chr2:28116019-28119019 | 3000 | 1.46666667 |
| chr2:30654019-30657019 | 3000 | 1.36666667 |
| chr2:30686019-30689019 | 3000 | 1.03333333 |
| chr2:32484655-32487655 | 3000 | 1.3        |
| chr2:32558655-32561655 | 3000 | 0.4        |
| chr2:32951655-32954655 | 3000 | 0.56666667 |
| chr2:32997655-33000655 | 3000 | 0.86666667 |
| chr2:33395655-33398655 | 3000 | 1.13333333 |
| chr2:37769655-37772655 | 3000 | 0.3        |
| chr2:39927655-39931655 | 4000 | 0.75       |
| chr2:39936655-39939655 | 3000 | 0.83333333 |
| chr2:39975655-39978655 | 3000 | 0.46666667 |
| chr2:40782655-40785655 | 3000 | 0.33333333 |
| chr2:41604655-41608655 | 4000 | 0.325      |
| chr2:42317655-42320655 | 3000 | 0.76666667 |
| chr2:42533655-42537655 | 4000 | 0.675      |
| chr2:44970655-44978655 | 8000 | 1.125      |
| chr2:45352655-45355655 | 3000 | 0.86666667 |
| chr2:46112655-46115655 | 3000 | 0.3        |
| chr2:46782655-46785655 | 3000 | 0.36666667 |
| chr2:46806655-46809655 | 3000 | 0.6        |
| chr2:46857655-46861655 | 4000 | 0.725      |
| chr2:47043655-47046655 | 3000 | 0.36666667 |
| chr2:47299655-47302655 | 3000 | 0.43333333 |
| chr2:48714655-48717655 | 3000 | 0.66666667 |
| chr2:49612655-49615655 | 3000 | 0.6        |
| chr2:49733655-49736655 | 3000 | 0.7        |
| chr2:50011655-50014655 | 3000 | 0.56666667 |
| chr2:50136655-50139655 | 3000 | 0.46666667 |
| chr2:50291655-50294655 | 3000 | 0.53333333 |
| chr2:50420655-50424655 | 4000 | 1.125      |
| chr2:51182655-51185655 | 3000 | 0.63333333 |
| chr2:51299655-51303655 | 4000 | 0.6        |
| chr2:51445655-51448655 | 3000 | 0.66666667 |
| chr2:53094655-53099655 | 5000 | 0.42       |
| chr2:53920655-53924655 | 4000 | 0.8        |
| chr2:53926655-53930655 | 4000 | 1.1        |

|                        |      |            |
|------------------------|------|------------|
| chr2:55535655-55538655 | 3000 | 1.26666667 |
| chr2:56178655-56181655 | 3000 | 0.53333333 |
| chr2:56198655-56201655 | 3000 | 0.63333333 |
| chr2:57053659-57057659 | 4000 | 0.375      |
| chr2:60253724-60256724 | 3000 | 0.26666667 |
| chr2:60317724-60320724 | 3000 | 0.56666667 |
| chr2:60508724-60511724 | 3000 | 0.46666667 |
| chr2:61109724-61113724 | 4000 | 0.95       |
| chr2:62949724-62952724 | 3000 | 0.83333333 |
| chr2:62963724-62968724 | 5000 | 0.78       |
| chr2:63761724-63765724 | 4000 | 0.175      |
| chr2:64150724-64154724 | 4000 | 0.2        |
| chr2:65517724-65520724 | 3000 | 0.23333333 |
| chr2:65521724-65524724 | 3000 | 0.36666667 |
| chr2:66953724-66957724 | 4000 | 0.475      |
| chr2:67811724-67814724 | 3000 | 0.63333333 |
| chr2:68806724-68809724 | 3000 | 0.26666667 |
| chr2:68961724-68964724 | 3000 | 0.4        |
| chr2:69343724-69346724 | 3000 | 0.43333333 |
| chr2:69743724-69746724 | 3000 | 0.33333333 |
| chr2:69913724-69916724 | 3000 | 0.56666667 |
| chr2:70206724-70210724 | 4000 | 0.375      |
| chr2:70524724-70527724 | 3000 | 1.26666667 |
| chr2:70804724-70807724 | 3000 | 0.3        |
| chr2:72206724-72209724 | 3000 | 0.43333333 |
| chr2:72299724-72302724 | 3000 | 0.66666667 |
| chr2:73073724-73076724 | 3000 | 0.53333333 |
| chr2:73309724-73312724 | 3000 | 0.56666667 |
| chr2:73539724-73547724 | 8000 | 0.35       |
| chr2:73593724-73596724 | 3000 | 0.6        |
| chr2:73666724-73670724 | 4000 | 0.475      |
| chr2:74035724-74038724 | 3000 | 0.43333333 |
| chr2:74292724-74295724 | 3000 | 0.7        |
| chr2:75346724-75349724 | 3000 | 0.83333333 |
| chr2:75784724-75787724 | 3000 | 0.56666667 |
| chr2:75946724-75949724 | 3000 | 1          |
| chr2:77710724-77713724 | 3000 | 0.3        |
| chr2:77731724-77734724 | 3000 | 0.26666667 |
| chr2:77748724-77751724 | 3000 | 0.7        |
| chr2:77823724-77826724 | 3000 | 0.5        |
| chr2:77885724-77888724 | 3000 | 0.3        |
| chr2:78114724-78117724 | 3000 | 0.46666667 |
| chr2:78282724-78285724 | 3000 | 0.4        |
| chr2:78384724-78387724 | 3000 | 0.66666667 |
| chr2:78777724-78781724 | 4000 | 0.4        |
| chr2:79022724-79027724 | 5000 | 0.38       |
| chr2:79096724-79100724 | 4000 | 0.675      |
| chr2:80808724-80812724 | 4000 | 0.25       |
| chr2:81204724-81208724 | 4000 | 0.55       |
| chr2:81836724-81840724 | 4000 | 0.4        |
| chr2:82770724-82773724 | 3000 | 0.6        |
| chr2:82888724-82891724 | 3000 | 0.5        |
| chr2:83133724-83136724 | 3000 | 0.46666667 |

|                          |      |            |
|--------------------------|------|------------|
| chr2:83801724-83804724   | 3000 | 0.4        |
| chr2:83833724-83836724   | 3000 | 1.13333333 |
| chr2:83879724-83882724   | 3000 | 0.66666667 |
| chr2:84005724-84008724   | 3000 | 0.56666667 |
| chr2:84065724-84069724   | 4000 | 0.5        |
| chr2:84648724-84651724   | 3000 | 0.53333333 |
| chr2:85539724-85542724   | 3000 | 0.26666667 |
| chr2:85736724-85739724   | 3000 | 0.26666667 |
| chr2:86113724-86117724   | 4000 | 0.25       |
| chr2:86159724-86162724   | 3000 | 0.56666667 |
| chr2:86460724-86464724   | 4000 | 0.375      |
| chr2:86574724-86577724   | 3000 | 0.2        |
| chr2:87479724-87482724   | 3000 | 0.53333333 |
| chr2:90145724-90150724   | 5000 | 0.56       |
| chr2:90188724-90191724   | 3000 | 0.33333333 |
| chr2:90485724-90489724   | 4000 | 0.25       |
| chr2:92329724-92332724   | 3000 | 0.4        |
| chr2:93878724-93881724   | 3000 | 2.63333333 |
| chr2:95030724-95034724   | 4000 | 1.325      |
| chr2:95671724-95675724   | 4000 | 0.4        |
| chr2:96436724-96440724   | 4000 | 0.85       |
| chr2:96754724-96757724   | 3000 | 0.2        |
| chr2:97510724-97513724   | 3000 | 0.13333333 |
| chr2:99154724-99157724   | 3000 | 0.63333333 |
| chr2:100284724-100288724 | 4000 | 0.3        |
| chr2:100957724-100960724 | 3000 | 0.43333333 |
| chr2:101518724-101521724 | 3000 | 0.5        |
| chr2:102303724-102306724 | 3000 | 0.36666667 |
| chr2:103299724-103303724 | 4000 | 0.375      |
| chr2:103573724-103577724 | 4000 | 0.1        |
| chr2:103965724-103969724 | 4000 | 0.325      |
| chr2:103996724-103999724 | 3000 | 0.43333333 |
| chr2:104613724-104616724 | 3000 | 1.06666667 |
| chr2:104689724-104692724 | 3000 | 0.53333333 |
| chr2:105074724-105082724 | 8000 | 0.6        |
| chr2:105606724-105609724 | 3000 | 0.86666667 |
| chr2:105865724-105868724 | 3000 | 0.43333333 |
| chr2:105969724-105972724 | 3000 | 0.36666667 |
| chr2:106044724-106048724 | 4000 | 0.3        |
| chr2:106183724-106187724 | 4000 | 0.475      |
| chr2:106680724-106684724 | 4000 | 0.35       |
| chr2:106882724-106886724 | 4000 | 0.725      |
| chr2:107109724-107115724 | 6000 | 0.53333333 |
| chr2:108168724-108171724 | 3000 | 0.36666667 |
| chr2:108201724-108204724 | 3000 | 0.4        |
| chr2:108320724-108325724 | 5000 | 0.28       |
| chr2:108818724-108821724 | 3000 | 0.43333333 |
| chr2:108981724-108986724 | 5000 | 0.6        |
| chr2:109167724-109170724 | 3000 | 0.36666667 |
| chr2:109404724-109408724 | 4000 | 0.275      |
| chr2:109504724-109508724 | 4000 | 0.425      |
| chr2:109769724-109772724 | 3000 | 0.43333333 |
| chr2:109788724-109791724 | 3000 | 0.66666667 |



|                          |      |            |
|--------------------------|------|------------|
| chr2:111126724-111129724 | 3000 | 0.43333333 |
| chr2:111132724-111135724 | 3000 | 0.26666667 |
| chr2:111265724-111269724 | 4000 | 0.425      |
| chr2:112281724-112284724 | 3000 | 1.26666667 |
| chr2:112554724-112557724 | 3000 | 1.03333333 |
| chr2:114348724-114352724 | 4000 | 0.3        |
| chr2:115179724-115182724 | 3000 | 1.03333333 |
| chr2:118032112-118035112 | 3000 | 0.6        |
| chr2:118246112-118249112 | 3000 | 1.03333333 |
| chr2:119570541-119573541 | 3000 | 0.46666667 |
| chr2:119720541-119723541 | 3000 | 0.2        |
| chr2:122836541-122840541 | 4000 | 0.675      |
| chr2:122973541-122976541 | 3000 | 1          |
| chr2:122981541-122984541 | 3000 | 0.9        |
| chr2:125347541-125350541 | 3000 | 0.56666667 |
| chr2:125653541-125656541 | 3000 | 1.16666667 |
| chr2:126050541-126053541 | 3000 | 0.96666667 |
| chr2:126227541-126231541 | 4000 | 0.45       |
| chr2:126339541-126342541 | 3000 | 0.73333333 |
| chr2:127281541-127284541 | 3000 | 0.26666667 |
| chr2:129445541-129448541 | 3000 | 0.5        |
| chr2:129925541-129930541 | 5000 | 0.34       |
| chr2:131820541-131823541 | 3000 | 0.6        |
| chr2:132172541-132175541 | 3000 | 0.5        |
| chr2:137430541-137433541 | 3000 | 0.4        |
| chr2:138411541-138414541 | 3000 | 0.53333333 |
| chr2:139029541-139033541 | 4000 | 0.525      |
| chr2:139340541-139345541 | 5000 | 0.42       |
| chr2:139574541-139579541 | 5000 | 0.38       |
| chr2:141636541-141639541 | 3000 | 1.26666667 |
| chr2:141740541-141743541 | 3000 | 1.06666667 |
| chr2:142222541-142226541 | 4000 | 0.975      |
| chr2:143821541-143824541 | 3000 | 1.13333333 |
| chr2:144290541-144293541 | 3000 | 0.93333333 |
| chr2:145425541-145428541 | 3000 | 0.43333333 |
| chr2:145596541-145599541 | 3000 | 0.7        |
| chr2:145744541-145749541 | 5000 | 0.62       |
| chr2:146033541-146036541 | 3000 | 0.7        |
| chr2:146069541-146072541 | 3000 | 0.43333333 |
| chr2:147270541-147273541 | 3000 | 0.73333333 |
| chr2:147487541-147490541 | 3000 | 1.13333333 |
| chr2:147523541-147530541 | 7000 | 0.62857143 |
| chr2:148187541-148191541 | 4000 | 0.65       |
| chr2:149072110-149075110 | 3000 | 0.43333333 |
| chr2:149276110-149279110 | 3000 | 0.4        |
| chr2:149691110-149694110 | 3000 | 0.63333333 |
| chr2:149695110-149698110 | 3000 | 0.46666667 |
| chr2:150105110-150108110 | 3000 | 1.23333333 |
| chr2:150290110-150294110 | 4000 | 0.5        |
| chr2:150402110-150405110 | 3000 | 0.36666667 |
| chr2:150432110-150435110 | 3000 | 0.8        |
| chr2:150618110-150621110 | 3000 | 0.4        |
| chr2:150674110-150677110 | 3000 | 1.16666667 |

|                          |      |            |
|--------------------------|------|------------|
| chr2:150722110-150727110 | 5000 | 0.5        |
| chr2:151051110-151054110 | 3000 | 0.4        |
| chr2:151365110-151368110 | 3000 | 0.36666667 |
| chr2:151955110-151960110 | 5000 | 0.42       |
| chr2:152654110-152657110 | 3000 | 0.53333333 |
| chr2:152856110-152859110 | 3000 | 0.36666667 |
| chr2:153307110-153310110 | 3000 | 0.7        |
| chr2:153395110-153398110 | 3000 | 0.6        |
| chr2:153418110-153422110 | 4000 | 0.575      |
| chr2:153533110-153536110 | 3000 | 1.1        |
| chr2:154848110-154851110 | 3000 | 0.9        |
| chr2:156219110-156222110 | 3000 | 1.6        |
| chr2:156248110-156251110 | 3000 | 0.6        |
| chr2:156524110-156529110 | 5000 | 0.76       |
| chr2:156635110-156638110 | 3000 | 0.33333333 |
| chr2:157244110-157249110 | 5000 | 0.48       |
| chr2:157287110-157290110 | 3000 | 1.73333333 |
| chr2:157629110-157633110 | 4000 | 0.575      |
| chr2:157979110-157982110 | 3000 | 0.33333333 |
| chr2:159826110-159831110 | 5000 | 1.06       |
| chr2:160096110-160100110 | 4000 | 0.5        |
| chr2:160179110-160182110 | 3000 | 0.43333333 |
| chr2:160394110-160397110 | 3000 | 0.53333333 |
| chr2:160613110-160616110 | 3000 | 0.46666667 |
| chr2:160803110-160806110 | 3000 | 0.63333333 |
| chr2:161329110-161332110 | 3000 | 0.26666667 |
| chr2:161844110-161847110 | 3000 | 0.66666667 |
| chr2:162159110-162162110 | 3000 | 0.16666667 |
| chr2:162182110-162188110 | 6000 | 0.43333333 |
| chr2:162950110-162953110 | 3000 | 0.36666667 |
| chr2:163091110-163094110 | 3000 | 0.53333333 |
| chr2:163156110-163161110 | 5000 | 0.56       |
| chr2:164604110-164609110 | 5000 | 0.12       |
| chr2:164822110-164825110 | 3000 | 0.33333333 |
| chr2:165445110-165449110 | 4000 | 0.5        |
| chr2:165495110-165498110 | 3000 | 0.5        |
| chr2:165559110-165564110 | 5000 | 0.36       |
| chr2:166211110-166214110 | 3000 | 0.33333333 |
| chr2:168150110-168155110 | 5000 | 0.64       |
| chr2:168901110-168904110 | 3000 | 0.2        |
| chr2:169597110-169603110 | 6000 | 0.45       |
| chr2:170403110-170409110 | 6000 | 0.85       |
| chr2:171792110-171795110 | 3000 | 0.83333333 |
| chr2:171885110-171888110 | 3000 | 0.2        |
| chr2:172136110-172139110 | 3000 | 0.43333333 |
| chr2:172334110-172338110 | 4000 | 0.725      |
| chr2:173198110-173201110 | 3000 | 0.53333333 |
| chr2:173892110-173896110 | 4000 | 0.825      |
| chr2:174137110-174140110 | 3000 | 0.23333333 |
| chr2:174588110-174592110 | 4000 | 0.625      |
| chr2:174856110-174861110 | 5000 | 0.88       |
| chr2:175050110-175053110 | 3000 | 0.43333333 |
| chr2:175239110-175242110 | 3000 | 0.86666667 |

|                          |      |            |
|--------------------------|------|------------|
| chr2:175466110-175471110 | 5000 | 1.14       |
| chr2:175604319-175607319 | 3000 | 0.83333333 |
| chr2:175636319-175640319 | 4000 | 0.625      |
| chr2:176951319-176955319 | 4000 | 0.3        |
| chr2:177170319-177173319 | 3000 | 0.86666667 |
| chr2:177381319-177384319 | 3000 | 0.96666667 |
| chr2:177681319-177685319 | 4000 | 0.975      |
| chr2:185021893-185024893 | 3000 | 0.86666667 |
| chr2:187134893-187137893 | 3000 | 0.66666667 |
| chr2:187782893-187785893 | 3000 | 0.76666667 |
| chr2:188566893-188570893 | 4000 | 0.575      |
| chr2:188760893-188763893 | 3000 | 0.8        |
| chr2:188779893-188782893 | 3000 | 1          |
| chr2:189075893-189079893 | 4000 | 0.925      |
| chr2:193522286-193525286 | 3000 | 0.53333333 |
| chr2:194123286-194126286 | 3000 | 0.36666667 |
| chr2:194209286-194213286 | 4000 | 0.4        |
| chr2:195071286-195074286 | 3000 | 0.5        |
| chr2:195278286-195281286 | 3000 | 0.53333333 |
| chr2:195342286-195346286 | 4000 | 0.6        |
| chr2:195373286-195376286 | 3000 | 0.76666667 |
| chr2:197508286-197514286 | 6000 | 0.51666667 |
| chr2:197659286-197662286 | 3000 | 0.6        |
| chr2:201629536-201632536 | 3000 | 0.36666667 |
| chr2:201670536-201673536 | 3000 | 0.56666667 |
| chr2:202046536-202049536 | 3000 | 0.53333333 |
| chr2:202068536-202071536 | 3000 | 0.4        |
| chr2:202237536-202240536 | 3000 | 0.43333333 |
| chr2:202581536-202586536 | 5000 | 0.7        |
| chr2:205337186-205340186 | 3000 | 0.56666667 |
| chr2:205407186-205414186 | 7000 | 0.52857143 |
| chr2:205733186-205736186 | 3000 | 1          |
| chr2:206013249-206017249 | 4000 | 0.5        |
| chr2:206599249-206602249 | 3000 | 0.5        |
| chr2:207056249-207060249 | 4000 | 0.225      |
| chr2:207081249-207086249 | 5000 | 0.34       |
| chr2:207258249-207261249 | 3000 | 0.76666667 |
| chr2:207329249-207333249 | 4000 | 0.775      |
| chr2:211269249-211272249 | 3000 | 0.53333333 |
| chr2:211353249-211356249 | 3000 | 0.63333333 |
| chr2:211447249-211450249 | 3000 | 0.46666667 |
| chr2:211624249-211627249 | 3000 | 0.66666667 |
| chr2:212480249-212483249 | 3000 | 0.6        |
| chr2:213374249-213378249 | 4000 | 0.375      |
| chr2:214337249-214340249 | 3000 | 0.6        |
| chr2:214450249-214453249 | 3000 | 0.76666667 |
| chr2:214748249-214752249 | 4000 | 0.925      |
| chr2:216889249-216893249 | 4000 | 0.65       |
| chr2:220630205-220633205 | 3000 | 0.53333333 |
| chr2:220661205-220664205 | 3000 | 0.76666667 |
| chr2:221758205-221763205 | 5000 | 0.34       |
| chr2:223721205-223725205 | 4000 | 0.875      |
| chr2:224142205-224146205 | 4000 | 0.45       |

|                          |       |            |
|--------------------------|-------|------------|
| chr2:225632205-225635205 | 3000  | 0.96666667 |
| chr2:225733205-225736205 | 3000  | 0.86666667 |
| chr2:226799205-226802205 | 3000  | 0.76666667 |
| chr2:227454205-227457205 | 3000  | 0.83333333 |
| chr2:228081205-228084205 | 3000  | 0.66666667 |
| chr2:229508205-229512205 | 4000  | 1.35       |
| chr2:229932202-229936202 | 4000  | 1.2        |
| chr2:231526202-231529202 | 3000  | 0.53333333 |
| chr2:231635202-231638202 | 3000  | 0.46666667 |
| chr2:231839202-231842202 | 3000  | 0.73333333 |
| chr2:232165202-232168202 | 3000  | 0.86666667 |
| chr2:232685202-232688202 | 3000  | 0.9        |
| chr2:234104202-234107202 | 3000  | 0.76666667 |
| chr2:234430202-234433202 | 3000  | 0.46666667 |
| chr2:234801202-234804202 | 3000  | 0.66666667 |
| chr2:235600202-235603202 | 3000  | 1.83333333 |
| chr2:236923202-236926202 | 3000  | 1.16666667 |
| chr2:237229202-237232202 | 3000  | 0.7        |
| chr2:238180202-238183202 | 3000  | 0.26666667 |
| chr2:239901202-239904202 | 3000  | 0.7        |
| chr2:242133202-242138202 | 5000  | 0.5        |
| chr2:243143202-243146202 | 3000  | 1.03333333 |
| chr2:244536202-244539202 | 3000  | 2.13333333 |
| chr2:245683202-245687202 | 4000  | 0.8        |
| chr2:246021202-246024202 | 3000  | 0.4        |
| chr2:246971202-246974202 | 3000  | 0.7        |
| chr2:248488202-248491202 | 3000  | 0.63333333 |
| chr2:249298202-249301202 | 3000  | 0.66666667 |
| chr2:249446202-249451202 | 5000  | 0.96       |
| chr2:249914202-249919202 | 5000  | 0.64       |
| chr2:250051202-250055202 | 4000  | 0.675      |
| chr2:251334202-251337202 | 3000  | 1.73333333 |
| chr2:251390202-251393202 | 3000  | 1.2        |
| chr2:252502112-252505112 | 3000  | 1.33333333 |
| chr2:254415112-254418112 | 3000  | 0.53333333 |
| chr2:255398112-255401112 | 3000  | 0.23333333 |
| chr2:255517112-255520112 | 3000  | 0.93333333 |
| chr2:255564112-255567112 | 3000  | 0.4        |
| chr2:257689112-257692112 | 3000  | 0.5        |
| chr20:1481929-1485929    | 4000  | 1.05       |
| chr20:1662929-1666929    | 4000  | 0.775      |
| chr20:2788508-2791508    | 3000  | 1.1        |
| chr20:3144397-3153397    | 9000  | 1.54444444 |
| chr20:3390397-3394397    | 4000  | 1.1        |
| chr20:4087145-4090145    | 3000  | 2.7        |
| chr20:5006671-5010671    | 4000  | 1.575      |
| chr20:5274938-5277938    | 3000  | 2.4        |
| chr20:10448938-10451938  | 3000  | 2.2        |
| chr20:10782938-10786938  | 4000  | 1.225      |
| chr20:10892938-10895938  | 3000  | 1.1        |
| chr20:10903938-10907938  | 4000  | 1.05       |
| chr20:11609044-11612044  | 3000  | 0.66666667 |
| chr20:12617612-12630612  | 13000 | 1.91538462 |

|                         |      |            |
|-------------------------|------|------------|
| chr20:12959612-12963612 | 4000 | 1.675      |
| chr20:13111612-13115612 | 4000 | 2.7        |
| chr20:13184612-13187612 | 3000 | 1.26666667 |
| chr20:13529378-13536378 | 7000 | 1.38571429 |
| chr20:13602378-13608378 | 6000 | 2          |
| chr20:13878378-13881378 | 3000 | 1.03333333 |
| chr20:25361900-25367900 | 6000 | 1.75       |
| chr20:25530900-25533900 | 3000 | 2.13333333 |
| chr20:25788900-25791900 | 3000 | 0.9        |
| chr20:25852900-25855900 | 3000 | 1.1        |
| chr20:26742900-26745900 | 3000 | 0.66666667 |
| chr20:27188900-27197900 | 9000 | 1.4        |
| chr20:27221900-27224900 | 3000 | 1.5        |
| chr20:28268204-28271204 | 3000 | 0.53333333 |
| chr20:28522204-28528204 | 6000 | 1.36666667 |
| chr20:28723204-28732204 | 9000 | 1.61111111 |
| chr20:28921204-28925204 | 4000 | 0.95       |
| chr20:29404204-29407204 | 3000 | 1.06666667 |
| chr20:29504204-29507204 | 3000 | 1.2        |
| chr20:29721981-29729981 | 8000 | 0.9875     |
| chr20:30229981-30232981 | 3000 | 1.06666667 |
| chr20:45897981-45902981 | 5000 | 1.52       |
| chr20:46106981-46110981 | 4000 | 2.075      |
| chr20:46171981-46174981 | 3000 | 2          |
| chr20:46690981-46695981 | 5000 | 1          |
| chr20:47160981-47169981 | 9000 | 2.16666667 |
| chr20:47564981-47567981 | 3000 | 1.26666667 |
| chr20:47792981-47799981 | 7000 | 1.41428571 |
| chr20:48048981-48051981 | 3000 | 1.26666667 |
| chr20:48269981-48272981 | 3000 | 1.16666667 |
| chr20:48319981-48326981 | 7000 | 1.6        |
| chr20:48748981-48751981 | 3000 | 1.16666667 |
| chr20:54869981-54872981 | 3000 | 0.53333333 |
| chr20:54898981-54901981 | 3000 | 0.8        |
| chr3:314001-317001      | 3000 | 0.56666667 |
| chr3:597001-601001      | 4000 | 0.725      |
| chr3:846001-849001      | 3000 | 0.96666667 |
| chr3:1318001-1321001    | 3000 | 0.43333333 |
| chr3:1671001-1674001    | 3000 | 0.4        |
| chr3:2367001-2370001    | 3000 | 0.26666667 |
| chr3:2582001-2585001    | 3000 | 0.63333333 |
| chr3:2883001-2889001    | 6000 | 0.55       |
| chr3:5436626-5439626    | 3000 | 0.3        |
| chr3:6187626-6190626    | 3000 | 1.33333333 |
| chr3:6738626-6741626    | 3000 | 0.66666667 |
| chr3:6976626-6979626    | 3000 | 0.83333333 |
| chr3:7292626-7295626    | 3000 | 1.3        |
| chr3:7310626-7313626    | 3000 | 1.5        |
| chr3:20103952-20106952  | 3000 | 0.3        |
| chr3:20136952-20140952  | 4000 | 0.425      |
| chr3:20280952-20283952  | 3000 | 0.36666667 |
| chr3:20553952-20556952  | 3000 | 0.3        |
| chr3:20822952-20826952  | 4000 | 0.375      |

|                        |      |            |
|------------------------|------|------------|
| chr3:21860952-21863952 | 3000 | 0.6        |
| chr3:21900952-21904952 | 4000 | 0.325      |
| chr3:22119952-22122952 | 3000 | 0.33333333 |
| chr3:23310952-23313952 | 3000 | 0.43333333 |
| chr3:23854952-23858952 | 4000 | 0.4        |
| chr3:24029952-24032952 | 3000 | 0.56666667 |
| chr3:25257952-25261952 | 4000 | 0.65       |
| chr3:25413952-25416952 | 3000 | 0.6        |
| chr3:25435952-25438952 | 3000 | 0.53333333 |
| chr3:25907952-25911952 | 4000 | 1.25       |
| chr3:26046952-26051952 | 5000 | 0.74       |
| chr3:26265952-26268952 | 3000 | 0.9        |
| chr3:26273952-26276952 | 3000 | 0.46666667 |
| chr3:27300952-27305952 | 5000 | 0.54       |
| chr3:28252952-28255952 | 3000 | 0.5        |
| chr3:28304952-28308952 | 4000 | 0.35       |
| chr3:28544952-28547952 | 3000 | 0.53333333 |
| chr3:28949952-28952952 | 3000 | 0.6        |
| chr3:29015952-29018952 | 3000 | 0.33333333 |
| chr3:29418952-29422952 | 4000 | 0.575      |
| chr3:30144852-30147852 | 3000 | 0.56666667 |
| chr3:30989852-30992852 | 3000 | 1          |
| chr3:31041852-31044852 | 3000 | 0.9        |
| chr3:31392852-31395852 | 3000 | 0.3        |
| chr3:31437852-31440852 | 3000 | 0.5        |
| chr3:31923852-31928852 | 5000 | 1.34       |
| chr3:34854852-34858852 | 4000 | 0.375      |
| chr3:34915852-34918852 | 3000 | 0.46666667 |
| chr3:34993852-34996852 | 3000 | 0.33333333 |
| chr3:35029852-35032852 | 3000 | 0.66666667 |
| chr3:35033852-35037852 | 4000 | 0.5        |
| chr3:35179852-35182852 | 3000 | 0.43333333 |
| chr3:35244852-35247852 | 3000 | 0.63333333 |
| chr3:35835852-35838852 | 3000 | 0.7        |
| chr3:35987852-35990852 | 3000 | 0.46666667 |
| chr3:37316852-37319852 | 3000 | 0.53333333 |
| chr3:38166852-38170852 | 4000 | 0.7        |
| chr3:39760678-39764678 | 4000 | 0.825      |
| chr3:39997678-40001678 | 4000 | 0.45       |
| chr3:40603678-40608678 | 5000 | 1.16       |
| chr3:41072678-41078678 | 6000 | 0.61666667 |
| chr3:42759678-42763678 | 4000 | 0.95       |
| chr3:42981678-42985678 | 4000 | 0.8        |
| chr3:46722678-46725678 | 3000 | 0.6        |
| chr3:49103678-49107678 | 4000 | 0.925      |
| chr3:49205678-49208678 | 3000 | 0.5        |
| chr3:54726647-54729647 | 3000 | 0.96666667 |
| chr3:56355647-56358647 | 3000 | 0.86666667 |
| chr3:57018647-57023647 | 5000 | 0.78       |
| chr3:57031647-57034647 | 3000 | 1.53333333 |
| chr3:57083647-57086647 | 3000 | 1.16666667 |
| chr3:58010647-58013647 | 3000 | 1.2        |
| chr3:60922116-60925116 | 3000 | 0.66666667 |

|                          |      |            |
|--------------------------|------|------------|
| chr3:62207116-62210116   | 3000 | 0.46666667 |
| chr3:64559116-64562116   | 3000 | 0.26666667 |
| chr3:64859116-64863116   | 4000 | 1.05       |
| chr3:65212116-65215116   | 3000 | 0.43333333 |
| chr3:65400116-65403116   | 3000 | 0.2        |
| chr3:65839116-65842116   | 3000 | 0.2        |
| chr3:65999116-66002116   | 3000 | 0.33333333 |
| chr3:66112116-66115116   | 3000 | 0.26666667 |
| chr3:66127116-66130116   | 3000 | 0.53333333 |
| chr3:66374116-66377116   | 3000 | 0.3        |
| chr3:66491116-66496116   | 5000 | 0.34       |
| chr3:67266116-67269116   | 3000 | 0.73333333 |
| chr3:70595116-70598116   | 3000 | 0.46666667 |
| chr3:70707116-70710116   | 3000 | 0.3        |
| chr3:72434116-72437116   | 3000 | 0.46666667 |
| chr3:72484116-72487116   | 3000 | 0.26666667 |
| chr3:73424116-73427116   | 3000 | 0.33333333 |
| chr3:73479116-73482116   | 3000 | 1.5        |
| chr3:78984116-78987116   | 3000 | 0.4        |
| chr3:79077116-79080116   | 3000 | 0.66666667 |
| chr3:79596116-79599116   | 3000 | 0.5        |
| chr3:79785116-79788116   | 3000 | 0.73333333 |
| chr3:80638116-80641116   | 3000 | 0.53333333 |
| chr3:80863116-80866116   | 3000 | 0.7        |
| chr3:81078116-81081116   | 3000 | 0.43333333 |
| chr3:82063116-82066116   | 3000 | 0.53333333 |
| chr3:82505116-82510116   | 5000 | 0.46       |
| chr3:85112116-85115116   | 3000 | 0.63333333 |
| chr3:86583116-86587116   | 4000 | 0.725      |
| chr3:92128901-92132901   | 4000 | 0.975      |
| chr3:92662901-92665901   | 3000 | 0.6        |
| chr3:92991901-92994901   | 3000 | 0.43333333 |
| chr3:93006901-93013901   | 7000 | 0.55714286 |
| chr3:93923901-93928901   | 5000 | 0.36       |
| chr3:93996901-93999901   | 3000 | 0.36666667 |
| chr3:94466901-94469901   | 3000 | 0.5        |
| chr3:94915901-94918901   | 3000 | 0.6        |
| chr3:99291901-99294901   | 3000 | 0.66666667 |
| chr3:99382901-99385901   | 3000 | 0.8        |
| chr3:101233901-101236901 | 3000 | 0.2        |
| chr3:101803901-101806901 | 3000 | 0.83333333 |
| chr3:102958901-102962901 | 4000 | 0.65       |
| chr3:103169901-103172901 | 3000 | 0.96666667 |
| chr3:103524901-103527901 | 3000 | 0.66666667 |
| chr3:109293259-109296259 | 3000 | 0.6        |
| chr3:109406259-109409259 | 3000 | 0.53333333 |
| chr3:111064259-111067259 | 3000 | 0.5        |
| chr3:111420259-111423259 | 3000 | 0.6        |
| chr3:111620259-111623259 | 3000 | 1.06666667 |
| chr3:111868259-111871259 | 3000 | 1          |
| chr3:112100259-112106259 | 6000 | 0.5        |
| chr3:112242259-112246259 | 4000 | 1.2        |
| chr3:114032259-114035259 | 3000 | 0.73333333 |

|                          |      |            |
|--------------------------|------|------------|
| chr3:120837278-120840278 | 3000 | 0.5        |
| chr3:122418278-122421278 | 3000 | 0.36666667 |
| chr3:122517278-122520278 | 3000 | 0.3        |
| chr3:123106278-123110278 | 4000 | 0.475      |
| chr3:123600278-123603278 | 3000 | 0.83333333 |
| chr3:123678278-123681278 | 3000 | 0.5        |
| chr3:123688278-123691278 | 3000 | 0.56666667 |
| chr3:124360278-124363278 | 3000 | 0.66666667 |
| chr3:124409278-124413278 | 4000 | 0.675      |
| chr3:124593278-124596278 | 3000 | 0.46666667 |
| chr3:124952278-124955278 | 3000 | 0.4        |
| chr3:125366278-125369278 | 3000 | 0.6        |
| chr3:125787278-125790278 | 3000 | 0.76666667 |
| chr3:125846278-125850278 | 4000 | 0.4        |
| chr3:125891278-125894278 | 3000 | 0.66666667 |
| chr3:126730278-126733278 | 3000 | 0.63333333 |
| chr3:126756278-126760278 | 4000 | 0.725      |
| chr3:126821278-126824278 | 3000 | 0.73333333 |
| chr3:127215278-127218278 | 3000 | 0.5        |
| chr3:127608278-127611278 | 3000 | 0.66666667 |
| chr3:127670278-127673278 | 3000 | 0.43333333 |
| chr3:127933278-127936278 | 3000 | 0.43333333 |
| chr3:128053278-128056278 | 3000 | 0.46666667 |
| chr3:129568278-129571278 | 3000 | 0.3        |
| chr3:129813278-129816278 | 3000 | 0.46666667 |
| chr3:130269278-130272278 | 3000 | 0.53333333 |
| chr3:130727278-130731278 | 4000 | 0.425      |
| chr3:130932278-130935278 | 3000 | 0.93333333 |
| chr3:131410278-131413278 | 3000 | 0.93333333 |
| chr3:131552278-131557278 | 5000 | 0.74       |
| chr3:131946278-131951278 | 5000 | 0.52       |
| chr3:133418278-133421278 | 3000 | 0.93333333 |
| chr3:133441278-133444278 | 3000 | 0.4        |
| chr3:133543278-133547278 | 4000 | 0.65       |
| chr3:135399278-135406278 | 7000 | 0.92857143 |
| chr3:136373278-136377278 | 4000 | 0.775      |
| chr3:136391278-136396278 | 5000 | 1.08       |
| chr3:136605278-136608278 | 3000 | 0.7        |
| chr3:136933278-136937278 | 4000 | 0.425      |
| chr3:137365278-137369278 | 4000 | 0.5        |
| chr3:140379278-140383278 | 4000 | 0.55       |
| chr3:140440278-140443278 | 3000 | 0.56666667 |
| chr3:149924398-149927398 | 3000 | 0.36666667 |
| chr3:150597398-150600398 | 3000 | 0.8        |
| chr3:151929398-151933398 | 4000 | 1.55       |
| chr3:152791398-152795398 | 4000 | 0.975      |
| chr3:153411398-153414398 | 3000 | 1.5        |
| chr3:153416398-153419398 | 3000 | 0.6        |
| chr3:161796801-161799801 | 3000 | 0.93333333 |
| chr3:162462801-162466801 | 4000 | 0.85       |
| chr3:165049506-165052506 | 3000 | 0.73333333 |
| chr4:2169001-2172001     | 3000 | 0.63333333 |
| chr4:3184001-3189001     | 5000 | 0.78       |



|                          |      |            |
|--------------------------|------|------------|
| chr4:3206001-3209001     | 3000 | 1.36666667 |
| chr4:3259001-3262001     | 3000 | 1.06666667 |
| chr4:4036001-4039001     | 3000 | 0.53333333 |
| chr4:4198001-4203001     | 5000 | 0.52       |
| chr4:6731703-6734703     | 3000 | 2.83333333 |
| chr4:8075703-8079703     | 4000 | 0.9        |
| chr4:9501703-9504703     | 3000 | 1.33333333 |
| chr4:11562302-11565302   | 3000 | 0.56666667 |
| chr4:11997302-12000302   | 3000 | 0.26666667 |
| chr4:12275302-12280302   | 5000 | 0.52       |
| chr4:13243302-13246302   | 3000 | 0.23333333 |
| chr4:14052302-14055302   | 3000 | 0.66666667 |
| chr4:15094302-15097302   | 3000 | 1.13333333 |
| chr4:15227302-15230302   | 3000 | 0.43333333 |
| chr4:15459302-15463302   | 4000 | 0.9        |
| chr4:15581302-15584302   | 3000 | 0.46666667 |
| chr4:16218302-16221302   | 3000 | 0.6        |
| chr4:31374302-31377302   | 3000 | 0.7        |
| chr4:32106302-32109302   | 3000 | 0.4        |
| chr4:37569302-37572302   | 3000 | 0.7        |
| chr4:40300302-40303302   | 3000 | 0.56666667 |
| chr4:40485302-40488302   | 3000 | 0.8        |
| chr4:41760302-41764302   | 4000 | 0.3        |
| chr4:42908302-42911302   | 3000 | 0.83333333 |
| chr4:44503302-44506302   | 3000 | 0.4        |
| chr4:45422302-45425302   | 3000 | 0.8        |
| chr4:45647302-45650302   | 3000 | 0.46666667 |
| chr4:48826444-48829444   | 3000 | 0.73333333 |
| chr4:49432520-49435520   | 3000 | 0.8        |
| chr4:50901520-50904520   | 3000 | 0.86666667 |
| chr4:65637941-65641941   | 4000 | 0.975      |
| chr4:65809941-65814941   | 5000 | 1.04       |
| chr4:65838941-65842941   | 4000 | 1.25       |
| chr4:68385941-68388941   | 3000 | 0.53333333 |
| chr4:69458941-69462941   | 4000 | 0.4        |
| chr4:71490941-71493941   | 3000 | 0.6        |
| chr4:72058941-72061941   | 3000 | 0.36666667 |
| chr4:75409941-75412941   | 3000 | 0.5        |
| chr4:75934941-75937941   | 3000 | 0.46666667 |
| chr4:76704299-76707299   | 3000 | 1.76666667 |
| chr4:78358299-78361299   | 3000 | 1.06666667 |
| chr4:78477299-78481299   | 4000 | 1.075      |
| chr4:79619299-79623299   | 4000 | 1.6        |
| chr4:85924316-85927316   | 3000 | 0.56666667 |
| chr4:87419316-87423316   | 4000 | 0.3        |
| chr4:92717316-92720316   | 3000 | 0.53333333 |
| chr4:93985316-93988316   | 3000 | 0.6        |
| chr4:95916316-95921316   | 5000 | 0.56       |
| chr4:97792316-97795316   | 3000 | 0.43333333 |
| chr4:101692316-101695316 | 3000 | 0.3        |
| chr4:102559316-102562316 | 3000 | 0.83333333 |
| chr4:102747316-102751316 | 4000 | 0.475      |
| chr4:103686316-103689316 | 3000 | 0.53333333 |

|                          |      |            |
|--------------------------|------|------------|
| chr4:104973747-104977747 | 4000 | 0.9        |
| chr4:105042747-105045747 | 3000 | 0.9        |
| chr4:106271472-106275472 | 4000 | 0.775      |
| chr4:107303472-107306472 | 3000 | 1.3        |
| chr4:107918472-107921472 | 3000 | 0.33333333 |
| chr4:112143472-112146472 | 3000 | 0.26666667 |
| chr4:112450472-112454472 | 4000 | 0.35       |
| chr4:114415472-114420472 | 5000 | 0.48       |
| chr4:115041472-115045472 | 4000 | 0.275      |
| chr4:115367472-115370472 | 3000 | 0.5        |
| chr4:115556472-115560472 | 4000 | 0.5        |
| chr4:116481472-116484472 | 3000 | 0.76666667 |
| chr4:116510472-116513472 | 3000 | 1.2        |
| chr4:116517472-116521472 | 4000 | 1.55       |
| chr4:116570472-116574472 | 4000 | 1.475      |
| chr4:116871472-116878472 | 7000 | 0.72857143 |
| chr4:117002472-117005472 | 3000 | 0.73333333 |
| chr4:117181472-117184472 | 3000 | 0.93333333 |
| chr4:117220472-117224472 | 4000 | 1.2        |
| chr4:117929006-117933006 | 4000 | 0.725      |
| chr4:118073006-118077006 | 4000 | 0.975      |
| chr4:118093006-118096006 | 3000 | 0.56666667 |
| chr4:120038308-120041308 | 3000 | 1.16666667 |
| chr4:120490308-120495308 | 5000 | 1.2        |
| chr4:122553876-122556876 | 3000 | 1.23333333 |
| chr4:122865876-122868876 | 3000 | 1.16666667 |
| chr4:123476473-123479473 | 3000 | 0.7        |
| chr4:125240436-125243436 | 3000 | 0.93333333 |
| chr4:126154436-126157436 | 3000 | 1.26666667 |
| chr4:126547436-126550436 | 3000 | 1.26666667 |
| chr4:126928436-126931436 | 3000 | 0.76666667 |
| chr4:130306436-130309436 | 3000 | 0.93333333 |
| chr4:132435436-132438436 | 3000 | 0.83333333 |
| chr4:136135436-136138436 | 3000 | 0.8        |
| chr4:136276436-136279436 | 3000 | 0.43333333 |
| chr4:136878436-136881436 | 3000 | 1.23333333 |
| chr4:137113436-137117436 | 4000 | 0.55       |
| chr4:138183436-138187436 | 4000 | 0.425      |
| chr4:142358436-142361436 | 3000 | 0.53333333 |
| chr4:142695436-142698436 | 3000 | 0.8        |
| chr4:143510436-143513436 | 3000 | 0.4        |
| chr4:144004436-144007436 | 3000 | 0.76666667 |
| chr4:146977436-146980436 | 3000 | 0.46666667 |
| chr4:148826436-148831436 | 5000 | 0.72       |
| chr4:149608818-149612818 | 4000 | 0.475      |
| chr4:152625818-152628818 | 3000 | 0.8        |
| chr4:154555248-154561248 | 6000 | 0.88333333 |
| chr4:157323248-157326248 | 3000 | 1.13333333 |
| chr4:160703193-160706193 | 3000 | 1.03333333 |
| chr4:160916193-160919193 | 3000 | 0.86666667 |
| chr4:162126660-162129660 | 3000 | 0.76666667 |
| chr4:163392961-163395961 | 3000 | 0.93333333 |
| chr4:163442961-163445961 | 3000 | 1.23333333 |

|                          |      |            |
|--------------------------|------|------------|
| chr4:165485961-165488961 | 3000 | 0.63333333 |
| chr4:166393961-166396961 | 3000 | 0.46666667 |
| chr4:167840105-167843105 | 3000 | 0.2        |
| chr4:170738105-170742105 | 4000 | 0.95       |
| chr4:171956105-171962105 | 6000 | 1.41666667 |
| chr4:172210105-172214105 | 4000 | 1.3        |
| chr4:172355105-172358105 | 3000 | 1.7        |
| chr4:172400105-172404105 | 4000 | 0.35       |
| chr4:172596105-172599105 | 3000 | 0.66666667 |
| chr4:173288105-173292105 | 4000 | 1.025      |
| chr4:173324105-173328105 | 4000 | 1.5        |
| chr4:173403105-173406105 | 3000 | 1.86666667 |
| chr4:173414105-173417105 | 3000 | 1.26666667 |
| chr4:173545105-173549105 | 4000 | 0.9        |
| chr4:173760105-173766105 | 6000 | 0.95       |
| chr4:174023105-174026105 | 3000 | 1.96666667 |
| chr4:180500105-180503105 | 3000 | 1.26666667 |
| chr4:180972105-180977105 | 5000 | 1.2        |
| chr4:181005105-181009105 | 4000 | 1.35       |
| chr4:184085105-184088105 | 3000 | 1.1        |
| chr4:186414105-186419105 | 5000 | 1.18       |
| chr5:267001-270001       | 3000 | 0.33333333 |
| chr5:456001-460001       | 4000 | 0.425      |
| chr5:282991-2832991      | 3000 | 0.63333333 |
| chr5:3476991-3479991     | 3000 | 0.7        |
| chr5:3482991-3486991     | 4000 | 0.9        |
| chr5:3557991-3561991     | 4000 | 0.875      |
| chr5:3936991-3939991     | 3000 | 0.4        |
| chr5:4293991-4298991     | 5000 | 1.14       |
| chr5:4583991-4587991     | 4000 | 0.725      |
| chr5:6348991-6353991     | 5000 | 0.38       |
| chr5:6434991-6439991     | 5000 | 0.54       |
| chr5:6933991-6937991     | 4000 | 0.425      |
| chr5:7639991-7643991     | 4000 | 0.625      |
| chr5:8032991-8035991     | 3000 | 0.46666667 |
| chr5:8176991-8179991     | 3000 | 0.7        |
| chr5:8282991-8285991     | 3000 | 1          |
| chr5:9916991-9919991     | 3000 | 0.33333333 |
| chr5:10324991-10327991   | 3000 | 0.7        |
| chr5:10452991-10455991   | 3000 | 0.23333333 |
| chr5:10595991-10598991   | 3000 | 0.46666667 |
| chr5:10612991-10615991   | 3000 | 0.26666667 |
| chr5:10624991-10629991   | 5000 | 0.18       |
| chr5:11191991-11195991   | 4000 | 0.325      |
| chr5:12332991-12335991   | 3000 | 1.06666667 |
| chr5:13082991-13085991   | 3000 | 0.5        |
| chr5:13135991-13139991   | 4000 | 0.7        |
| chr5:13207991-13210991   | 3000 | 0.33333333 |
| chr5:15120991-15124991   | 4000 | 0.7        |
| chr5:15546991-15549991   | 3000 | 0.5        |
| chr5:15697991-15701991   | 4000 | 0.475      |
| chr5:17343991-17347991   | 4000 | 0.475      |
| chr5:18916991-18919991   | 3000 | 0.63333333 |

|                        |      |            |
|------------------------|------|------------|
| chr5:19002991-19007991 | 5000 | 0.64       |
| chr5:19046991-19050991 | 4000 | 0.45       |
| chr5:19204991-19208991 | 4000 | 0.825      |
| chr5:19274991-19277991 | 3000 | 0.53333333 |
| chr5:19394991-19398991 | 4000 | 0.3        |
| chr5:19567991-19571991 | 4000 | 0.85       |
| chr5:19765846-19768846 | 3000 | 1.2        |
| chr5:19774846-19777846 | 3000 | 0.56666667 |
| chr5:21700846-21703846 | 3000 | 0.83333333 |
| chr5:22088846-22092846 | 4000 | 0.475      |
| chr5:23069846-23072846 | 3000 | 0.76666667 |
| chr5:23175846-23179846 | 4000 | 0.5        |
| chr5:23836846-23839846 | 3000 | 0.53333333 |
| chr5:23949846-23952846 | 3000 | 0.66666667 |
| chr5:23960846-23964846 | 4000 | 0.5        |
| chr5:24169846-24172846 | 3000 | 0.33333333 |
| chr5:24345846-24348846 | 3000 | 0.8        |
| chr5:25420846-25424846 | 4000 | 0.775      |
| chr5:25630846-25633846 | 3000 | 0.8        |
| chr5:26244846-26247846 | 3000 | 0.96666667 |
| chr5:26584846-26587846 | 3000 | 0.6        |
| chr5:26613846-26616846 | 3000 | 1.13333333 |
| chr5:27694846-27697846 | 3000 | 0.86666667 |
| chr5:27793846-27796846 | 3000 | 0.66666667 |
| chr5:27817846-27820846 | 3000 | 1.83333333 |
| chr5:28078846-28082846 | 4000 | 0.425      |
| chr5:29546846-29549846 | 3000 | 0.43333333 |
| chr5:29838846-29842846 | 4000 | 0.75       |
| chr5:31138172-31141172 | 3000 | 0.5        |
| chr5:32178172-32181172 | 3000 | 0.7        |
| chr5:32262172-32266172 | 4000 | 0.475      |
| chr5:32416172-32419172 | 3000 | 0.66666667 |
| chr5:32977172-32980172 | 3000 | 0.43333333 |
| chr5:33063172-33066172 | 3000 | 0.6        |
| chr5:33490172-33493172 | 3000 | 0.56666667 |
| chr5:33513172-33516172 | 3000 | 0.6        |
| chr5:33786172-33790172 | 4000 | 0.575      |
| chr5:34661172-34665172 | 4000 | 0.5        |
| chr5:34989172-34993172 | 4000 | 0.5        |
| chr5:35078172-35081172 | 3000 | 1.36666667 |
| chr5:36382172-36385172 | 3000 | 0.6        |
| chr5:38174172-38178172 | 4000 | 0.475      |
| chr5:39499172-39502172 | 3000 | 0.5        |
| chr5:39823172-39826172 | 3000 | 0.4        |
| chr5:39849172-39852172 | 3000 | 0.93333333 |
| chr5:39856172-39859172 | 3000 | 0.23333333 |
| chr5:40399172-40403172 | 4000 | 0.525      |
| chr5:40661172-40665172 | 4000 | 0.575      |
| chr5:40756172-40759172 | 3000 | 0.73333333 |
| chr5:41465545-41468545 | 3000 | 0.5        |
| chr5:41469545-41475545 | 6000 | 0.41666667 |
| chr5:41973545-41976545 | 3000 | 0.46666667 |
| chr5:43610545-43613545 | 3000 | 0.43333333 |

|                          |      |            |
|--------------------------|------|------------|
| chr5:43947545-43950545   | 3000 | 0.46666667 |
| chr5:43970545-43973545   | 3000 | 0.33333333 |
| chr5:44050545-44053545   | 3000 | 0.46666667 |
| chr5:44422545-44425545   | 3000 | 0.36666667 |
| chr5:44710545-44716545   | 6000 | 0.48333333 |
| chr5:45791545-45794545   | 3000 | 0.46666667 |
| chr5:45993545-45996545   | 3000 | 0.73333333 |
| chr5:46979545-46983545   | 4000 | 0.475      |
| chr5:47139545-47142545   | 3000 | 0.43333333 |
| chr5:47938545-47942545   | 4000 | 0.625      |
| chr5:49917545-49921545   | 4000 | 0.875      |
| chr5:49963545-49967545   | 4000 | 0.95       |
| chr5:50338545-50341545   | 3000 | 0.4        |
| chr5:50951545-50954545   | 3000 | 0.33333333 |
| chr5:51016545-51023545   | 7000 | 0.71428571 |
| chr5:51937545-51944545   | 7000 | 0.61428571 |
| chr5:52762545-52765545   | 3000 | 0.16666667 |
| chr5:53094545-53098545   | 4000 | 0.7        |
| chr5:53991545-53994545   | 3000 | 0.46666667 |
| chr5:54930545-54934545   | 4000 | 0.35       |
| chr5:55802545-55805545   | 3000 | 0.4        |
| chr5:56572545-56575545   | 3000 | 0.46666667 |
| chr5:56825545-56829545   | 4000 | 0.55       |
| chr5:57239545-57242545   | 3000 | 0.8        |
| chr5:57243545-57246545   | 3000 | 1.46666667 |
| chr5:57459545-57462545   | 3000 | 0.93333333 |
| chr5:57518545-57521545   | 3000 | 0.83333333 |
| chr5:64939261-64945261   | 6000 | 0.65       |
| chr5:64979261-64982261   | 3000 | 0.73333333 |
| chr5:65546261-65551261   | 5000 | 0.64       |
| chr5:66845261-66848261   | 3000 | 0.86666667 |
| chr5:67180261-67183261   | 3000 | 0.63333333 |
| chr5:67417261-67420261   | 3000 | 0.5        |
| chr5:67471261-67476261   | 5000 | 0.38       |
| chr5:67681261-67684261   | 3000 | 0.43333333 |
| chr5:68104261-68107261   | 3000 | 0.36666667 |
| chr5:69724261-69727261   | 3000 | 0.36666667 |
| chr5:70426261-70429261   | 3000 | 0.63333333 |
| chr5:72309261-72312261   | 3000 | 0.36666667 |
| chr5:72394261-72399261   | 5000 | 0.62       |
| chr5:72453261-72456261   | 3000 | 0.83333333 |
| chr5:78688458-78691458   | 3000 | 1.46666667 |
| chr5:80825817-80828817   | 3000 | 0.66666667 |
| chr5:82329817-82332817   | 3000 | 0.56666667 |
| chr5:82848817-82851817   | 3000 | 0.66666667 |
| chr5:84614817-84617817   | 3000 | 0.23333333 |
| chr5:84739817-84742817   | 3000 | 0.56666667 |
| chr5:100506817-100510817 | 4000 | 0.25       |
| chr5:100722817-100726817 | 4000 | 0.55       |
| chr5:100756817-100759817 | 3000 | 0.66666667 |
| chr5:102601817-102605817 | 4000 | 0.425      |
| chr5:103014817-103018817 | 4000 | 0.75       |
| chr5:103094817-103097817 | 3000 | 0.8        |

|                          |      |            |
|--------------------------|------|------------|
| chr5:103997817-104002817 | 5000 | 0.7        |
| chr5:106712817-106716817 | 4000 | 0.5        |
| chr5:106987817-106995817 | 8000 | 0.6        |
| chr5:108601817-108605817 | 4000 | 0.525      |
| chr5:108853817-108857817 | 4000 | 0.75       |
| chr5:109772817-109775817 | 3000 | 0.2        |
| chr5:109816817-109819817 | 3000 | 0.93333333 |
| chr5:109860817-109865817 | 5000 | 0.46       |
| chr5:110115817-110119817 | 4000 | 0.35       |
| chr5:110202817-110205817 | 3000 | 0.73333333 |
| chr5:110298817-110301817 | 3000 | 0.36666667 |
| chr5:110480817-110483817 | 3000 | 0.7        |
| chr5:110583817-110588817 | 5000 | 0.76       |
| chr5:111113817-111116817 | 3000 | 0.76666667 |
| chr5:112105817-112108817 | 3000 | 0.33333333 |
| chr5:113575817-113578817 | 3000 | 0.56666667 |
| chr5:114148817-114151817 | 3000 | 0.36666667 |
| chr5:114152817-114155817 | 3000 | 0.43333333 |
| chr5:114285817-114288817 | 3000 | 1          |
| chr5:117063817-117066817 | 3000 | 0.5        |
| chr5:117155817-117158817 | 3000 | 0.43333333 |
| chr5:118522817-118526817 | 4000 | 1.225      |
| chr5:118699817-118702817 | 3000 | 0.56666667 |
| chr5:120051817-120054817 | 3000 | 1.56666667 |
| chr5:122727817-122731817 | 4000 | 0.425      |
| chr5:123028817-123032817 | 4000 | 0.65       |
| chr5:124375817-124378817 | 3000 | 0.7        |
| chr5:124939817-124942817 | 3000 | 0.33333333 |
| chr5:125018817-125021817 | 3000 | 0.4        |
| chr5:125163817-125166817 | 3000 | 0.7        |
| chr5:127172415-127175415 | 3000 | 0.73333333 |
| chr5:132359271-132362271 | 3000 | 0.4        |
| chr5:132386271-132389271 | 3000 | 0.33333333 |
| chr5:133522271-133526271 | 4000 | 0.575      |
| chr5:134801271-134804271 | 3000 | 0.7        |
| chr5:134862271-134866271 | 4000 | 0.675      |
| chr5:135170271-135173271 | 3000 | 0.43333333 |
| chr5:135960271-135964271 | 4000 | 0.525      |
| chr5:139341039-139345039 | 4000 | 0.325      |
| chr5:139457039-139461039 | 4000 | 0.325      |
| chr5:147014039-147017039 | 3000 | 1.63333333 |
| chr5:150116039-150119039 | 3000 | 1.3        |
| chr5:163300332-163303332 | 3000 | 0.3        |
| chr5:170129531-170134531 | 5000 | 1.22       |
| chr5:170142531-170146531 | 4000 | 1.425      |
| chr5:170149531-170152531 | 3000 | 2.03333333 |
| chr5:170219531-170222531 | 3000 | 1.33333333 |
| chr5:170258531-170262531 | 4000 | 0.75       |
| chr5:170315531-170318531 | 3000 | 0.93333333 |
| chr5:170517531-170520531 | 3000 | 2.46666667 |
| chr5:170717531-170722531 | 5000 | 1.38       |
| chr6:840001-843001       | 3000 | 0.7        |
| chr6:2316001-2319001     | 3000 | 1.2        |

|                        |      |            |
|------------------------|------|------------|
| chr6:2383001-2386001   | 3000 | 1          |
| chr6:2601001-2604001   | 3000 | 0.53333333 |
| chr6:5321001-5325001   | 4000 | 0.175      |
| chr6:6101001-6105001   | 4000 | 0.65       |
| chr6:12686041-12689041 | 3000 | 0.93333333 |
| chr6:12726041-12729041 | 3000 | 0.36666667 |
| chr6:12786041-12789041 | 3000 | 0.86666667 |
| chr6:13642041-13645041 | 3000 | 0.46666667 |
| chr6:14432041-14435041 | 3000 | 0.73333333 |
| chr6:16474041-16478041 | 4000 | 0.425      |
| chr6:16549041-16552041 | 3000 | 0.2        |
| chr6:16919041-16924041 | 5000 | 0.26       |
| chr6:19624041-19628041 | 4000 | 0.675      |
| chr6:21334041-21337041 | 3000 | 1          |
| chr6:23017520-23021520 | 4000 | 0.75       |
| chr6:28893874-28896874 | 3000 | 0.86666667 |
| chr6:29882874-29885874 | 3000 | 0.53333333 |
| chr6:31393874-31396874 | 3000 | 0.43333333 |
| chr6:32667841-32670841 | 3000 | 1.03333333 |
| chr6:33051841-33056841 | 5000 | 0.54       |
| chr6:34005841-34008841 | 3000 | 0.56666667 |
| chr6:34039841-34042841 | 3000 | 0.3        |
| chr6:34093841-34096841 | 3000 | 0.9        |
| chr6:34165841-34168841 | 3000 | 0.7        |
| chr6:34326841-34330841 | 4000 | 0.45       |
| chr6:34359841-34362841 | 3000 | 0.56666667 |
| chr6:34494841-34498841 | 4000 | 0.75       |
| chr6:35797841-35802841 | 5000 | 0.72       |
| chr6:37027841-37031841 | 4000 | 0.825      |
| chr6:37163841-37166841 | 3000 | 0.43333333 |
| chr6:37173841-37176841 | 3000 | 1.06666667 |
| chr6:37177841-37180841 | 3000 | 0.7        |
| chr6:37227841-37230841 | 3000 | 0.76666667 |
| chr6:37470841-37473841 | 3000 | 0.83333333 |
| chr6:37641841-37644841 | 3000 | 0.33333333 |
| chr6:37725841-37728841 | 3000 | 1.16666667 |
| chr6:39113841-39117841 | 4000 | 0.475      |
| chr6:39391841-39394841 | 3000 | 0.83333333 |
| chr6:39525841-39528841 | 3000 | 0.86666667 |
| chr6:39972841-39977841 | 5000 | 0.36       |
| chr6:40872841-40875841 | 3000 | 1.03333333 |
| chr6:44512420-44515420 | 3000 | 0.36666667 |
| chr6:44962420-44965420 | 3000 | 0.8        |
| chr6:45050420-45053420 | 3000 | 0.7        |
| chr6:45496420-45499420 | 3000 | 0.5        |
| chr6:45568420-45571420 | 3000 | 0.43333333 |
| chr6:45747420-45750420 | 3000 | 0.7        |
| chr6:45820420-45823420 | 3000 | 0.76666667 |
| chr6:46094420-46097420 | 3000 | 0.76666667 |
| chr6:46198420-46201420 | 3000 | 0.53333333 |
| chr6:47041420-47044420 | 3000 | 0.6        |
| chr6:47147420-47150420 | 3000 | 0.8        |
| chr6:47422420-47426420 | 4000 | 0.7        |

|                        |      |            |
|------------------------|------|------------|
| chr6:47639420-47643420 | 4000 | 0.725      |
| chr6:48719420-48722420 | 3000 | 0.7        |
| chr6:48745420-48748420 | 3000 | 0.56666667 |
| chr6:50531420-50534420 | 3000 | 0.36666667 |
| chr6:50557420-50562420 | 5000 | 0.8        |
| chr6:50798420-50803420 | 5000 | 0.22       |
| chr6:50879420-50882420 | 3000 | 0.46666667 |
| chr6:50886420-50890420 | 4000 | 0.6        |
| chr6:51039420-51042420 | 3000 | 0.8        |
| chr6:51862420-51865420 | 3000 | 1.1        |
| chr6:51868420-51871420 | 3000 | 0.76666667 |
| chr6:52520420-52523420 | 3000 | 1.13333333 |
| chr6:52566420-52569420 | 3000 | 1.3        |
| chr6:53220420-53223420 | 3000 | 0.5        |
| chr6:53497420-53501420 | 4000 | 0.975      |
| chr6:54090420-54093420 | 3000 | 0.33333333 |
| chr6:54114420-54117420 | 3000 | 0.36666667 |
| chr6:54465420-54468420 | 3000 | 0.4        |
| chr6:55385420-55388420 | 3000 | 0.53333333 |
| chr6:55567420-55571420 | 4000 | 0.525      |
| chr6:55781420-55786420 | 5000 | 0.68       |
| chr6:57051420-57054420 | 3000 | 0.76666667 |
| chr6:59332420-59336420 | 4000 | 0.475      |
| chr6:61184420-61187420 | 3000 | 0.6        |
| chr6:61237420-61240420 | 3000 | 0.26666667 |
| chr6:61470420-61474420 | 4000 | 0.625      |
| chr6:62638420-62642420 | 4000 | 0.525      |
| chr6:62786420-62789420 | 3000 | 0.43333333 |
| chr6:63303420-63306420 | 3000 | 0.53333333 |
| chr6:63413420-63416420 | 3000 | 0.36666667 |
| chr6:63446420-63449420 | 3000 | 0.8        |
| chr6:63468420-63472420 | 4000 | 0.775      |
| chr6:64404420-64408420 | 4000 | 0.475      |
| chr6:65279420-65283420 | 4000 | 0.125      |
| chr6:65386420-65389420 | 3000 | 0.4        |
| chr6:66142420-66145420 | 3000 | 0.46666667 |
| chr6:66422420-66426420 | 4000 | 0.925      |
| chr6:66469420-66472420 | 3000 | 0.7        |
| chr6:68022420-68027420 | 5000 | 0.42       |
| chr6:68595420-68599420 | 4000 | 0.375      |
| chr6:68998420-69001420 | 3000 | 0.6        |
| chr6:69984420-69987420 | 3000 | 0.83333333 |
| chr6:71310420-71314420 | 4000 | 0.975      |
| chr6:72839420-72843420 | 4000 | 0.55       |
| chr6:74275358-74278358 | 3000 | 1.1        |
| chr6:77801358-77810358 | 9000 | 0.55555556 |
| chr6:77950358-77953358 | 3000 | 0.63333333 |
| chr6:78914358-78918358 | 4000 | 0.75       |
| chr6:79046358-79050358 | 4000 | 0.725      |
| chr6:80161898-80164898 | 3000 | 0.43333333 |
| chr6:81258898-81262898 | 4000 | 0.4        |
| chr6:81616898-81619898 | 3000 | 0.53333333 |
| chr6:82235898-82239898 | 4000 | 0.35       |



|                          |      |            |
|--------------------------|------|------------|
| chr6:82273898-82277898   | 4000 | 0.65       |
| chr6:83480898-83483898   | 3000 | 0.23333333 |
| chr6:83910898-83913898   | 3000 | 0.26666667 |
| chr6:85645898-85648898   | 3000 | 0.46666667 |
| chr6:85773898-85776898   | 3000 | 0.63333333 |
| chr6:86298898-86301898   | 3000 | 0.73333333 |
| chr6:86619898-86622898   | 3000 | 1.16666667 |
| chr6:86671898-86675898   | 4000 | 1          |
| chr6:86973898-86976898   | 3000 | 0.9        |
| chr6:87057898-87060898   | 3000 | 0.26666667 |
| chr6:87218898-87221898   | 3000 | 0.76666667 |
| chr6:87233898-87236898   | 3000 | 0.3        |
| chr6:87581898-87585898   | 4000 | 0.4        |
| chr6:89794898-89797898   | 3000 | 1.36666667 |
| chr6:90013898-90016898   | 3000 | 0.56666667 |
| chr6:90214898-90218898   | 4000 | 1          |
| chr6:90321898-90324898   | 3000 | 0.43333333 |
| chr6:93662347-93665347   | 3000 | 0.56666667 |
| chr6:93669347-93672347   | 3000 | 0.96666667 |
| chr6:93811347-93814347   | 3000 | 0.86666667 |
| chr6:97010308-97014308   | 4000 | 0.825      |
| chr6:97275308-97278308   | 3000 | 0.6        |
| chr6:97295308-97299308   | 4000 | 0.65       |
| chr6:97306308-97309308   | 3000 | 0.5        |
| chr6:100237308-100240308 | 3000 | 0.36666667 |
| chr6:105414308-105417308 | 3000 | 1.33333333 |
| chr6:106837531-106840531 | 3000 | 1.4        |
| chr6:113451075-113454075 | 3000 | 0.5        |
| chr6:113963075-113966075 | 3000 | 0.56666667 |
| chr6:114733075-114736075 | 3000 | 0.93333333 |
| chr6:116166075-116171075 | 5000 | 0.18       |
| chr6:118529075-118534075 | 5000 | 0.48       |
| chr6:118744075-118748075 | 4000 | 0.6        |
| chr6:118791075-118795075 | 4000 | 0.7        |
| chr6:119297075-119300075 | 3000 | 0.3        |
| chr6:120938075-120942075 | 4000 | 0.5        |
| chr6:122073075-122076075 | 3000 | 0.8        |
| chr6:122081075-122084075 | 3000 | 0.8        |
| chr6:122172075-122175075 | 3000 | 0.7        |
| chr6:122250075-122253075 | 3000 | 0.36666667 |
| chr6:122267075-122273075 | 6000 | 1.05       |
| chr6:122531075-122535075 | 4000 | 0.85       |
| chr6:125861075-125865075 | 4000 | 0.2        |
| chr6:126008075-126011075 | 3000 | 0.8        |
| chr6:127914075-127917075 | 3000 | 0.5        |
| chr6:127990075-127994075 | 4000 | 1          |
| chr6:129512075-129515075 | 3000 | 1.5        |
| chr6:130595075-130599075 | 4000 | 1.05       |
| chr6:130887075-130890075 | 3000 | 0.66666667 |
| chr6:131090075-131093075 | 3000 | 0.73333333 |
| chr6:133894075-133897075 | 3000 | 0.76666667 |
| chr6:133936075-133939075 | 3000 | 0.6        |
| chr6:134472075-134475075 | 3000 | 0.8        |

|                          |       |            |
|--------------------------|-------|------------|
| chr6:135012075-135015075 | 3000  | 0.56666667 |
| chr6:135023075-135026075 | 3000  | 0.96666667 |
| chr6:135029075-135033075 | 4000  | 1.3        |
| chr6:138763365-138766365 | 3000  | 0.33333333 |
| chr6:139994365-139997365 | 3000  | 0.2        |
| chr6:143329365-143338365 | 9000  | 0.64444444 |
| chr6:143378365-143381365 | 3000  | 0.83333333 |
| chr6:143937365-143941365 | 4000  | 0.625      |
| chr6:144039365-144043365 | 4000  | 0.85       |
| chr6:144332365-144335365 | 3000  | 0.46666667 |
| chr6:144488365-144493365 | 5000  | 1.22       |
| chr7:2458001-2461001     | 3000  | 0.9        |
| chr7:3586364-3589364     | 3000  | 0.26666667 |
| chr7:4842364-4845364     | 3000  | 0.83333333 |
| chr7:5341364-5345364     | 4000  | 0.35       |
| chr7:6406364-6409364     | 3000  | 0.33333333 |
| chr7:8199364-8202364     | 3000  | 0.53333333 |
| chr7:8349364-8352364     | 3000  | 0.5        |
| chr7:8832364-8843364     | 11000 | 0.43636364 |
| chr7:9016364-9019364     | 3000  | 0.5        |
| chr7:9023364-9026364     | 3000  | 0.76666667 |
| chr7:9415364-9418364     | 3000  | 0.5        |
| chr7:11976364-11979364   | 3000  | 0.6        |
| chr7:21772364-21775364   | 3000  | 0.83333333 |
| chr7:26101364-26105364   | 4000  | 0.9        |
| chr7:26131364-26135364   | 4000  | 1.225      |
| chr7:26794364-26799364   | 5000  | 0.36       |
| chr7:27079364-27082364   | 3000  | 1.03333333 |
| chr7:27366364-27370364   | 4000  | 0.525      |
| chr7:27473364-27477364   | 4000  | 0.625      |
| chr7:27591364-27594364   | 3000  | 1.06666667 |
| chr7:28633364-28637364   | 4000  | 0.575      |
| chr7:28662364-28665364   | 3000  | 0.96666667 |
| chr7:28775364-28778364   | 3000  | 0.56666667 |
| chr7:33190364-33193364   | 3000  | 0.53333333 |
| chr7:33628364-33631364   | 3000  | 1.23333333 |
| chr7:33700364-33703364   | 3000  | 0.3        |
| chr7:34320364-34323364   | 3000  | 0.83333333 |
| chr7:34329364-34332364   | 3000  | 0.66666667 |
| chr7:35202364-35207364   | 5000  | 0.52       |
| chr7:37388364-37391364   | 3000  | 0.5        |
| chr7:37456364-37459364   | 3000  | 0.33333333 |
| chr7:37648364-37651364   | 3000  | 2          |
| chr7:37857364-37861364   | 4000  | 0.375      |
| chr7:38288862-38294862   | 6000  | 0.91666667 |
| chr7:38475862-38478862   | 3000  | 0.76666667 |
| chr7:39238862-39244862   | 6000  | 0.68333333 |
| chr7:39461862-39466862   | 5000  | 0.24       |
| chr7:40329862-40333862   | 4000  | 0.25       |
| chr7:41276862-41281862   | 5000  | 0.6        |
| chr7:42906862-42909862   | 3000  | 0.5        |
| chr7:43519862-43522862   | 3000  | 0.53333333 |
| chr7:44848862-44851862   | 3000  | 0.33333333 |

|                        |      |            |
|------------------------|------|------------|
| chr7:45021862-45027862 | 6000 | 0.46666667 |
| chr7:45267862-45270862 | 3000 | 0.76666667 |
| chr7:45290862-45293862 | 3000 | 0.66666667 |
| chr7:45500862-45503862 | 3000 | 1.2        |
| chr7:45751862-45756862 | 5000 | 0.72       |
| chr7:47363862-47366862 | 3000 | 0.43333333 |
| chr7:47769862-47772862 | 3000 | 0.43333333 |
| chr7:47975862-47978862 | 3000 | 0.4        |
| chr7:52045862-52048862 | 3000 | 0.26666667 |
| chr7:52096862-52101862 | 5000 | 0.4        |
| chr7:52287862-52290862 | 3000 | 0.36666667 |
| chr7:52678862-52681862 | 3000 | 0.4        |
| chr7:53683862-53686862 | 3000 | 0.43333333 |
| chr7:53921862-53924862 | 3000 | 0.73333333 |
| chr7:53928862-53931862 | 3000 | 0.93333333 |
| chr7:54381862-54385862 | 4000 | 0.525      |
| chr7:57644862-57647862 | 3000 | 0.63333333 |
| chr7:57794862-57798862 | 4000 | 1.275      |
| chr7:57828862-57831862 | 3000 | 1.46666667 |
| chr7:57969862-57972862 | 3000 | 0.63333333 |
| chr7:58943862-58946862 | 3000 | 0.96666667 |
| chr7:59058862-59061862 | 3000 | 1.13333333 |
| chr7:59292862-59296862 | 4000 | 1.2        |
| chr7:59761862-59764862 | 3000 | 0.4        |
| chr7:60017862-60021862 | 4000 | 0.975      |
| chr7:61136862-61139862 | 3000 | 0.7        |
| chr7:61919862-61922862 | 3000 | 0.5        |
| chr7:63195862-63198862 | 3000 | 0.76666667 |
| chr7:63267862-63270862 | 3000 | 0.93333333 |
| chr7:63430862-63433862 | 3000 | 0.46666667 |
| chr7:64236862-64239862 | 3000 | 0.86666667 |
| chr7:64275862-64283862 | 8000 | 0.4375     |
| chr7:64566862-64569862 | 3000 | 0.6        |
| chr7:64774862-64779862 | 5000 | 0.38       |
| chr7:65645862-65648862 | 3000 | 0.53333333 |
| chr7:65782862-65787862 | 5000 | 1.06       |
| chr7:66375862-66378862 | 3000 | 0.9        |
| chr7:66471862-66474862 | 3000 | 1.76666667 |
| chr7:66491862-66494862 | 3000 | 1.06666667 |
| chr7:66790862-66794862 | 4000 | 0.375      |
| chr7:67774862-67778862 | 4000 | 0.325      |
| chr7:68196356-68201356 | 5000 | 0.74       |
| chr7:68216356-68219356 | 3000 | 0.46666667 |
| chr7:68699356-68703356 | 4000 | 0.6        |
| chr7:69202356-69205356 | 3000 | 1.86666667 |
| chr7:69215356-69218356 | 3000 | 0.56666667 |
| chr7:73433549-73437549 | 4000 | 0.875      |
| chr7:75648549-75651549 | 3000 | 0.73333333 |
| chr7:75655549-75658549 | 3000 | 0.7        |
| chr7:75704549-75708549 | 4000 | 1.15       |
| chr7:76808254-76811254 | 3000 | 0.63333333 |
| chr7:77283300-77287300 | 4000 | 0.325      |
| chr7:77328300-77331300 | 3000 | 0.56666667 |

|                          |      |            |
|--------------------------|------|------------|
| chr7:77543300-77547300   | 4000 | 0.425      |
| chr7:77602300-77605300   | 3000 | 0.8        |
| chr7:78008300-78011300   | 3000 | 0.63333333 |
| chr7:80294050-80299050   | 5000 | 0.82       |
| chr7:80868561-80871561   | 3000 | 0.26666667 |
| chr7:80935561-80938561   | 3000 | 0.3        |
| chr7:81196561-81199561   | 3000 | 0.33333333 |
| chr7:81696561-81699561   | 3000 | 0.53333333 |
| chr7:83310561-83313561   | 3000 | 0.6        |
| chr7:84265968-84268968   | 3000 | 0.66666667 |
| chr7:84767637-84771637   | 4000 | 0.575      |
| chr7:85116637-85119637   | 3000 | 0.26666667 |
| chr7:85557778-85560778   | 3000 | 0.2        |
| chr7:85758778-85765778   | 7000 | 0.32857143 |
| chr7:87939575-87942575   | 3000 | 0.56666667 |
| chr7:88511575-88514575   | 3000 | 0.7        |
| chr7:88532575-88535575   | 3000 | 0.56666667 |
| chr7:88638575-88641575   | 3000 | 0.6        |
| chr7:88703575-88708575   | 5000 | 0.78       |
| chr7:90096575-90099575   | 3000 | 0.46666667 |
| chr7:90669575-90672575   | 3000 | 0.63333333 |
| chr7:91182575-91185575   | 3000 | 0.66666667 |
| chr7:92117575-92120575   | 3000 | 0.7        |
| chr7:92267575-92271575   | 4000 | 0.45       |
| chr7:92442575-92445575   | 3000 | 0.56666667 |
| chr7:93069575-93073575   | 4000 | 0.6        |
| chr7:93973305-93976305   | 3000 | 0.63333333 |
| chr7:95386806-95389806   | 3000 | 0.76666667 |
| chr7:96759655-96763655   | 4000 | 0.425      |
| chr7:97385655-97388655   | 3000 | 0.5        |
| chr7:97842655-97845655   | 3000 | 0.43333333 |
| chr7:98100655-98105655   | 5000 | 0.3        |
| chr7:98327655-98330655   | 3000 | 0.76666667 |
| chr7:99778655-99782655   | 4000 | 0.575      |
| chr7:99817655-99821655   | 4000 | 0.375      |
| chr7:101714655-101717655 | 3000 | 1.1        |
| chr7:102156655-102159655 | 3000 | 0.43333333 |
| chr7:102425655-102429655 | 4000 | 0.45       |
| chr7:102931655-102935655 | 4000 | 0.575      |
| chr7:103003655-103007655 | 4000 | 0.425      |
| chr7:103403655-103406655 | 3000 | 0.56666667 |
| chr7:103619655-103622655 | 3000 | 0.3        |
| chr7:103630655-103634655 | 4000 | 0.275      |
| chr7:103646655-103649655 | 3000 | 0.8        |
| chr7:103745655-103748655 | 3000 | 0.56666667 |
| chr7:103753655-103756655 | 3000 | 0.4        |
| chr7:103880655-103886655 | 6000 | 0.33333333 |
| chr7:104245655-104248655 | 3000 | 0.46666667 |
| chr7:104298655-104301655 | 3000 | 0.5        |
| chr7:105591655-105594655 | 3000 | 1.06666667 |
| chr7:105598655-105601655 | 3000 | 0.46666667 |
| chr7:105775655-105778655 | 3000 | 0.66666667 |
| chr7:106205655-106211655 | 6000 | 0.75       |

|                          |      |            |
|--------------------------|------|------------|
| chr7:106281655-106284655 | 3000 | 0.6        |
| chr7:107424655-107427655 | 3000 | 0.5        |
| chr7:108432655-108437655 | 5000 | 0.38       |
| chr7:108456655-108459655 | 3000 | 0.66666667 |
| chr7:108469655-108472655 | 3000 | 0.53333333 |
| chr7:108566655-108569655 | 3000 | 0.93333333 |
| chr7:108739655-108742655 | 3000 | 0.5        |
| chr7:108961655-108964655 | 3000 | 0.63333333 |
| chr7:108977655-108981655 | 4000 | 0.625      |
| chr7:109033655-109036655 | 3000 | 0.26666667 |
| chr7:109283655-109286655 | 3000 | 0.7        |
| chr7:109340655-109343655 | 3000 | 0.6        |
| chr7:109587655-109590655 | 3000 | 0.43333333 |
| chr7:110183655-110186655 | 3000 | 0.7        |
| chr7:111664655-111667655 | 3000 | 1.56666667 |
| chr7:111812655-111815655 | 3000 | 1.33333333 |
| chr7:112083655-112086655 | 3000 | 0.96666667 |
| chr7:112757655-112760655 | 3000 | 1.16666667 |
| chr7:112897655-112900655 | 3000 | 1.33333333 |
| chr7:113057655-113060655 | 3000 | 0.8        |
| chr7:116341655-116346655 | 5000 | 1.12       |
| chr7:116472655-116475655 | 3000 | 1.43333333 |
| chr7:124385877-124389877 | 4000 | 0.975      |
| chr7:124600877-124603877 | 3000 | 1.2        |
| chr7:124988877-124991877 | 3000 | 1.23333333 |
| chr7:125042877-125045877 | 3000 | 0.93333333 |
| chr7:125260877-125264877 | 4000 | 1.525      |
| chr7:126177929-126180929 | 3000 | 0.86666667 |
| chr7:126300929-126303929 | 3000 | 0.53333333 |
| chr7:126466929-126471929 | 5000 | 1.32       |
| chr7:126536929-126539929 | 3000 | 0.93333333 |
| chr7:126834929-126839929 | 5000 | 1          |
| chr7:126869929-126873929 | 4000 | 0.55       |
| chr7:128770929-128773929 | 3000 | 0.9        |
| chr7:128786929-128790929 | 4000 | 0.65       |
| chr7:128870929-128874929 | 4000 | 1.225      |
| chr7:129687929-129690929 | 3000 | 1.36666667 |
| chr7:130087929-130092929 | 5000 | 0.82       |
| chr7:130100929-130103929 | 3000 | 0.5        |
| chr7:130554929-130559929 | 5000 | 0.8        |
| chr7:131082752-131085752 | 3000 | 0.9        |
| chr7:131329752-131333752 | 4000 | 1.025      |
| chr7:132216752-132219752 | 3000 | 1.16666667 |
| chr7:132289752-132293752 | 4000 | 1.25       |
| chr7:132480752-132483752 | 3000 | 0.8        |
| chr7:132533752-132536752 | 3000 | 0.5        |
| chr7:132791752-132794752 | 3000 | 1.03333333 |
| chr7:132983752-132986752 | 3000 | 1.7        |
| chr7:133595752-133598752 | 3000 | 0.9        |
| chr7:133744752-133747752 | 3000 | 1.9        |
| chr7:134558752-134561752 | 3000 | 1.33333333 |
| chr7:136327759-136330759 | 3000 | 2          |
| chr8:398252-401252       | 3000 | 0.33333333 |

|                        |      |            |
|------------------------|------|------------|
| chr8:448252-451252     | 3000 | 0.43333333 |
| chr8:558252-561252     | 3000 | 0.2        |
| chr8:1008252-1011252   | 3000 | 0.5        |
| chr8:1541252-1544252   | 3000 | 0.4        |
| chr8:1602252-1605252   | 3000 | 0.66666667 |
| chr8:2306252-2309252   | 3000 | 0.46666667 |
| chr8:3369252-3376252   | 7000 | 0.3        |
| chr8:3821252-3825252   | 4000 | 0.475      |
| chr8:3920252-3923252   | 3000 | 0.5        |
| chr8:4279252-4284252   | 5000 | 0.76       |
| chr8:5079252-5082252   | 3000 | 0.8        |
| chr8:5218252-5221252   | 3000 | 1.2        |
| chr8:5218252-5221252   | 3000 | 1.2        |
| chr8:5265252-5268252   | 3000 | 0.16666667 |
| chr8:5280252-5283252   | 3000 | 0.26666667 |
| chr8:6268252-6272252   | 4000 | 0.3        |
| chr8:6268252-6272252   | 4000 | 0.3        |
| chr8:6703252-6708252   | 5000 | 0.66       |
| chr8:7098252-7101252   | 3000 | 0.5        |
| chr8:7285252-7288252   | 3000 | 0.8        |
| chr8:7911252-7914252   | 3000 | 0.73333333 |
| chr8:8157252-8160252   | 3000 | 0.46666667 |
| chr8:8642252-8645252   | 3000 | 0.66666667 |
| chr8:8903252-8906252   | 3000 | 0.63333333 |
| chr8:8923252-8926252   | 3000 | 0.83333333 |
| chr8:8923252-8926252   | 3000 | 0.83333333 |
| chr8:9270252-9273252   | 3000 | 0.4        |
| chr8:9348252-9351252   | 3000 | 0.26666667 |
| chr8:9687252-9690252   | 3000 | 0.66666667 |
| chr8:11062252-11067252 | 5000 | 0.72       |
| chr8:12344252-12347252 | 3000 | 2          |
| chr8:12766252-12769252 | 3000 | 1.03333333 |
| chr8:12815252-12818252 | 3000 | 0.56666667 |
| chr8:12866252-12871252 | 5000 | 0.54       |
| chr8:12866252-12871252 | 5000 | 0.54       |
| chr8:13021252-13025252 | 4000 | 0.75       |
| chr8:13536252-13540252 | 4000 | 0.5        |
| chr8:13592252-13595252 | 3000 | 0.53333333 |
| chr8:14340252-14343252 | 3000 | 0.93333333 |
| chr8:14650252-14653252 | 3000 | 0.6        |
| chr8:14650252-14653252 | 3000 | 0.6        |
| chr8:17001252-17006252 | 5000 | 0.48       |
| chr8:18129252-18132252 | 3000 | 0.2        |
| chr8:18624252-18629252 | 5000 | 0.42       |
| chr8:22594159-22598159 | 4000 | 0.675      |
| chr8:23292159-23296159 | 4000 | 0.45       |
| chr8:23488159-23494159 | 6000 | 0.63333333 |
| chr8:24056159-24060159 | 4000 | 0.425      |
| chr8:24631159-24634159 | 3000 | 1.5        |
| chr8:25440159-25443159 | 3000 | 0.6        |
| chr8:25590159-25594159 | 4000 | 0.9        |
| chr8:25853159-25856159 | 3000 | 0.6        |
| chr8:25953159-25959159 | 6000 | 0.5        |

|                        |      |            |
|------------------------|------|------------|
| chr8:26069159-26072159 | 3000 | 0.4        |
| chr8:26144159-26147159 | 3000 | 0.56666667 |
| chr8:26177159-26180159 | 3000 | 0.53333333 |
| chr8:26523159-26526159 | 3000 | 0.6        |
| chr8:27193159-27198159 | 5000 | 1.08       |
| chr8:27228159-27231159 | 3000 | 0.43333333 |
| chr8:27317159-27320159 | 3000 | 0.73333333 |
| chr8:27913159-27916159 | 3000 | 0.3        |
| chr8:28643159-28646159 | 3000 | 0.83333333 |
| chr8:29098159-29101159 | 3000 | 0.93333333 |
| chr8:29212159-29216159 | 4000 | 0.875      |
| chr8:29947159-29950159 | 3000 | 0.63333333 |
| chr8:29952159-29957159 | 5000 | 0.92       |
| chr8:30134159-30137159 | 3000 | 0.86666667 |
| chr8:30502159-30505159 | 3000 | 0.63333333 |
| chr8:32933659-32937659 | 4000 | 0.65       |
| chr8:33617659-33621659 | 4000 | 0.3        |
| chr8:33899659-33902659 | 3000 | 0.76666667 |
| chr8:34011659-34015659 | 4000 | 0.825      |
| chr8:34276659-34279659 | 3000 | 0.73333333 |
| chr8:35946659-35950659 | 4000 | 0.3        |
| chr8:36745659-36748659 | 3000 | 0.46666667 |
| chr8:39456865-39459865 | 3000 | 0.4        |
| chr8:39926865-39929865 | 3000 | 0.46666667 |
| chr8:40254865-40257865 | 3000 | 0.46666667 |
| chr8:41843865-41847865 | 4000 | 0.575      |
| chr8:42073865-42076865 | 3000 | 0.4        |
| chr8:43192661-43195661 | 3000 | 1.3        |
| chr8:44790034-44793034 | 3000 | 0.53333333 |
| chr8:53659813-53663813 | 4000 | 0.75       |
| chr8:54627813-54630813 | 3000 | 1.13333333 |
| chr8:55245813-55248813 | 3000 | 1.03333333 |
| chr8:55943813-55946813 | 3000 | 0.53333333 |
| chr8:55989813-55992813 | 3000 | 1.03333333 |
| chr8:56000813-56003813 | 3000 | 0.4        |
| chr8:56065813-56069813 | 4000 | 0.525      |
| chr8:80661726-80665726 | 4000 | 0.675      |
| chr8:80903726-80907726 | 4000 | 0.525      |
| chr8:81054726-81058726 | 4000 | 0.4        |
| chr8:81188726-81191726 | 3000 | 0.73333333 |
| chr8:81329726-81332726 | 3000 | 0.46666667 |
| chr8:81799726-81803726 | 4000 | 0.45       |
| chr8:81823726-81826726 | 3000 | 0.4        |
| chr8:81881726-81884726 | 3000 | 0.76666667 |
| chr8:82020726-82023726 | 3000 | 0.16666667 |
| chr8:82355726-82358726 | 3000 | 1.23333333 |
| chr8:82390726-82393726 | 3000 | 0.96666667 |
| chr8:84053726-84057726 | 4000 | 0.5        |
| chr8:85783726-85787726 | 4000 | 0.65       |
| chr8:86903726-86906726 | 3000 | 0.73333333 |
| chr8:87187726-87190726 | 3000 | 0.53333333 |
| chr8:87593726-87596726 | 3000 | 0.23333333 |
| chr8:87622726-87625726 | 3000 | 0.4        |

|                          |      |            |
|--------------------------|------|------------|
| chr8:87772726-87776726   | 4000 | 0.65       |
| chr8:87874726-87877726   | 3000 | 1.06666667 |
| chr8:89360726-89363726   | 3000 | 1.4        |
| chr8:91249726-91252726   | 3000 | 0.8        |
| chr8:91612726-91615726   | 3000 | 0.5        |
| chr8:93103726-93107726   | 4000 | 0.55       |
| chr8:94386288-94389288   | 3000 | 0.36666667 |
| chr8:95657288-95660288   | 3000 | 0.5        |
| chr8:96236288-96239288   | 3000 | 0.46666667 |
| chr8:97674288-97677288   | 3000 | 0.63333333 |
| chr8:97735288-97739288   | 4000 | 0.425      |
| chr8:98053288-98057288   | 4000 | 0.925      |
| chr8:98795288-98799288   | 4000 | 0.425      |
| chr8:99032288-99035288   | 3000 | 0.46666667 |
| chr8:99165288-99169288   | 4000 | 0.575      |
| chr8:99179288-99182288   | 3000 | 1.16666667 |
| chr8:99388288-99391288   | 3000 | 0.46666667 |
| chr8:99409288-99413288   | 4000 | 0.325      |
| chr8:99468288-99472288   | 4000 | 0.575      |
| chr8:100086288-100089288 | 3000 | 0.93333333 |
| chr8:100399288-100402288 | 3000 | 1.03333333 |
| chr8:102562288-102566288 | 4000 | 0.875      |
| chr8:102767288-102770288 | 3000 | 0.63333333 |
| chr8:103267288-103270288 | 3000 | 0.36666667 |
| chr8:103494288-103499288 | 5000 | 0.72       |
| chr8:103528288-103531288 | 3000 | 0.73333333 |
| chr8:104855882-104858882 | 3000 | 1.23333333 |
| chr8:105010882-105015882 | 5000 | 1.1        |
| chr8:105156882-105159882 | 3000 | 0.96666667 |
| chr8:106602882-106605882 | 3000 | 1          |
| chr8:109631882-109635882 | 4000 | 1.4        |
| chr8:110352882-110355882 | 3000 | 0.96666667 |
| chr8:117661123-117664123 | 3000 | 0.7        |
| chr8:120049123-120052123 | 3000 | 1.5        |
| chr8:121972123-121976123 | 4000 | 1.5        |
| chr9:125001-128001       | 3000 | 0.23333333 |
| chr9:2681001-2684001     | 3000 | 0.86666667 |
| chr9:2752001-2755001     | 3000 | 0.4        |
| chr9:3214001-3218001     | 4000 | 0.8        |
| chr9:3765001-3768001     | 3000 | 0.4        |
| chr9:3956001-3959001     | 3000 | 0.43333333 |
| chr9:4013001-4017001     | 4000 | 0.35       |
| chr9:4609001-4613001     | 4000 | 0.7        |
| chr9:4742001-4745001     | 3000 | 0.83333333 |
| chr9:4976001-4980001     | 4000 | 0.725      |
| chr9:14263948-14268948   | 5000 | 0.44       |
| chr9:14822948-14825948   | 3000 | 0.46666667 |
| chr9:14965948-14968948   | 3000 | 0.16666667 |
| chr9:15114948-15118948   | 4000 | 0.9        |
| chr9:15306948-15312948   | 6000 | 0.63333333 |
| chr9:16748948-16751948   | 3000 | 0.4        |
| chr9:16757948-16761948   | 4000 | 0.7        |
| chr9:16901948-16904948   | 3000 | 0.3        |



|                        |      |            |
|------------------------|------|------------|
| chr9:19373948-19377948 | 4000 | 0.725      |
| chr9:21784948-21787948 | 3000 | 0.6        |
| chr9:21795948-21799948 | 4000 | 0.775      |
| chr9:21828948-21831948 | 3000 | 0.5        |
| chr9:21849948-21852948 | 3000 | 0.7        |
| chr9:22365948-22369948 | 4000 | 0.475      |
| chr9:23412948-23415948 | 3000 | 1.23333333 |
| chr9:23532948-23535948 | 3000 | 1.4        |
| chr9:23658948-23661948 | 3000 | 0.7        |
| chr9:24504948-24509948 | 5000 | 0.66       |
| chr9:24730948-24733948 | 3000 | 0.5        |
| chr9:25091948-25094948 | 3000 | 0.46666667 |
| chr9:25568948-25571948 | 3000 | 0.4        |
| chr9:25768948-25773948 | 5000 | 0.62       |
| chr9:26129948-26132948 | 3000 | 0.73333333 |
| chr9:26147948-26150948 | 3000 | 0.43333333 |
| chr9:26419948-26423948 | 4000 | 0.525      |
| chr9:28402948-28405948 | 3000 | 0.26666667 |
| chr9:29011948-29015948 | 4000 | 0.575      |
| chr9:30344948-30348948 | 4000 | 0.525      |
| chr9:30350948-30353948 | 3000 | 0.7        |
| chr9:30481948-30484948 | 3000 | 0.46666667 |
| chr9:30543948-30547948 | 4000 | 0.525      |
| chr9:30679948-30682948 | 3000 | 0.4        |
| chr9:30975948-30979948 | 4000 | 0.325      |
| chr9:31134948-31137948 | 3000 | 0.9        |
| chr9:31527948-31530948 | 3000 | 0.73333333 |
| chr9:31540948-31543948 | 3000 | 0.6        |
| chr9:31562948-31565948 | 3000 | 0.3        |
| chr9:31633948-31636948 | 3000 | 0.7        |
| chr9:32116948-32119948 | 3000 | 0.8        |
| chr9:32129948-32132948 | 3000 | 1.23333333 |
| chr9:32153948-32157948 | 4000 | 1          |
| chr9:32368948-32371948 | 3000 | 1.5        |
| chr9:33966948-33970948 | 4000 | 0.675      |
| chr9:34018948-34021948 | 3000 | 0.53333333 |
| chr9:37795948-37798948 | 3000 | 2.2        |
| chr9:38136948-38139948 | 3000 | 0.9        |
| chr9:38834948-38838948 | 4000 | 0.85       |
| chr9:39678948-39681948 | 3000 | 0.6        |
| chr9:39943948-39947948 | 4000 | 0.975      |
| chr9:40102948-40106948 | 4000 | 0.6        |
| chr9:40754948-40757948 | 3000 | 1.1        |
| chr9:40809948-40812948 | 3000 | 0.53333333 |
| chr9:40863948-40866948 | 3000 | 0.96666667 |
| chr9:41605948-41608948 | 3000 | 0.8        |
| chr9:41735948-41739948 | 4000 | 0.875      |
| chr9:42219948-42223948 | 4000 | 1.275      |
| chr9:42501948-42504948 | 3000 | 1.13333333 |
| chr9:42618948-42621948 | 3000 | 1.36666667 |
| chr9:44080948-44083948 | 3000 | 0.2        |
| chr9:44320948-44323948 | 3000 | 0.46666667 |
| chr9:44625948-44628948 | 3000 | 0.5        |

|                        |      |            |
|------------------------|------|------------|
| chr9:44814948-44817948 | 3000 | 0.26666667 |
| chr9:45474948-45477948 | 3000 | 0.63333333 |
| chr9:45497948-45501948 | 4000 | 1.025      |
| chr9:45595948-45598948 | 3000 | 0.5        |
| chr9:45918948-45921948 | 3000 | 0.5        |
| chr9:47387948-47391948 | 4000 | 0.775      |
| chr9:47561948-47564948 | 3000 | 1          |
| chr9:48293948-48296948 | 3000 | 0.6        |
| chr9:48746948-48749948 | 3000 | 0.7        |
| chr9:50301948-50304948 | 3000 | 0.7        |
| chr9:50669948-50672948 | 3000 | 0.43333333 |
| chr9:50790948-50793948 | 3000 | 0.4        |
| chr9:50978948-50981948 | 3000 | 0.46666667 |
| chr9:51746948-51749948 | 3000 | 0.26666667 |
| chr9:51769948-51773948 | 4000 | 0.575      |
| chr9:52105948-52108948 | 3000 | 0.5        |
| chr9:52326948-52329948 | 3000 | 0.86666667 |
| chr9:52807948-52810948 | 3000 | 1.2        |
| chr9:54214043-54217043 | 3000 | 0.43333333 |
| chr9:54564043-54567043 | 3000 | 0.26666667 |
| chr9:55039043-55042043 | 3000 | 0.93333333 |
| chr9:55351043-55354043 | 3000 | 0.63333333 |
| chr9:56087683-56090683 | 3000 | 1.2        |
| chr9:56265683-56268683 | 3000 | 0.6        |
| chr9:56502683-56505683 | 3000 | 0.7        |
| chr9:56651683-56657683 | 6000 | 0.65       |
| chr9:59629879-59632879 | 3000 | 0.73333333 |
| chr9:60054879-60057879 | 3000 | 1.2        |
| chr9:61561879-61566879 | 5000 | 0.28       |
| chr9:64039879-64042879 | 3000 | 0.56666667 |
| chr9:64087879-64090879 | 3000 | 0.4        |
| chr9:64209879-64212879 | 3000 | 0.23333333 |
| chr9:64566879-64571879 | 5000 | 0.34       |
| chr9:66311879-66314879 | 3000 | 0.63333333 |
| chr9:66667879-66671879 | 4000 | 0.525      |
| chr9:67469879-67472879 | 3000 | 0.86666667 |
| chr9:68032879-68035879 | 3000 | 0.83333333 |
| chr9:68038879-68042879 | 4000 | 0.6        |
| chr9:68755879-68758879 | 3000 | 0.83333333 |
| chr9:72363876-72368876 | 5000 | 0.82       |
| chr9:72370876-72374876 | 4000 | 0.975      |
| chr9:72618876-72622876 | 4000 | 0.825      |
| chr9:72686876-72693876 | 7000 | 0.75714286 |
| chr9:72753876-72756876 | 3000 | 0.56666667 |
| chr9:73017876-73020876 | 3000 | 0.43333333 |
| chr9:73091876-73094876 | 3000 | 0.63333333 |
| chr9:75483290-75486290 | 3000 | 1.16666667 |
| chr9:75860290-75864290 | 4000 | 0.825      |
| chr9:78672290-78675290 | 3000 | 0.23333333 |
| chr9:79391290-79394290 | 3000 | 0.63333333 |
| chr9:79420290-79424290 | 4000 | 1.5        |
| chr9:79796290-79799290 | 3000 | 0.7        |
| chr9:80103290-80106290 | 3000 | 1.03333333 |

|                          |      |            |
|--------------------------|------|------------|
| chr9:80172290-80175290   | 3000 | 0.7        |
| chr9:80377290-80380290   | 3000 | 0.6        |
| chr9:80676290-80679290   | 3000 | 0.63333333 |
| chr9:81250290-81253290   | 3000 | 0.13333333 |
| chr9:83071290-83074290   | 3000 | 0.43333333 |
| chr9:83244290-83247290   | 3000 | 0.63333333 |
| chr9:83702290-83705290   | 3000 | 0.6        |
| chr9:89768290-89771290   | 3000 | 1.16666667 |
| chr9:89920290-89923290   | 3000 | 0.8        |
| chr9:91823290-91826290   | 3000 | 0.76666667 |
| chr9:91891290-91895290   | 4000 | 1.05       |
| chr9:93424290-93427290   | 3000 | 1.1        |
| chr9:93942290-93946290   | 4000 | 1.375      |
| chr9:94423290-94426290   | 3000 | 0.56666667 |
| chr9:94741290-94745290   | 4000 | 0.525      |
| chr9:95580290-95586290   | 6000 | 0.56666667 |
| chr9:95678290-95681290   | 3000 | 0.8        |
| chr9:95699290-95702290   | 3000 | 0.73333333 |
| chr9:95849290-95853290   | 4000 | 0.4        |
| chr9:98722290-98725290   | 3000 | 0.5        |
| chr9:99382290-99385290   | 3000 | 1.06666667 |
| chr9:99522290-99525290   | 3000 | 0.83333333 |
| chr9:99658290-99661290   | 3000 | 0.43333333 |
| chr9:99764290-99767290   | 3000 | 0.46666667 |
| chr9:99813290-99816290   | 3000 | 0.86666667 |
| chr9:99947290-99950290   | 3000 | 0.4        |
| chr9:99985290-99988290   | 3000 | 0.4        |
| chr9:100729290-100735290 | 6000 | 0.51666667 |
| chr9:100826290-100829290 | 3000 | 0.8        |
| chr9:102953290-102956290 | 3000 | 0.93333333 |
| chr9:103269290-103272290 | 3000 | 1.43333333 |
| chr9:103991290-103994290 | 3000 | 1.46666667 |
| chr9:104095290-104098290 | 3000 | 1.63333333 |
| chr9:105337290-105342290 | 5000 | 0.7        |
| chr9:106797290-106801290 | 4000 | 2          |
| chr9:107328290-107331290 | 3000 | 0.6        |
| chr9:107361290-107364290 | 3000 | 1.1        |
| chr9:107447290-107451290 | 4000 | 1.5        |
| chr9:107605290-107609290 | 4000 | 0.975      |
| chr9:107832290-107835290 | 3000 | 0.53333333 |
| chr9:108214290-108218290 | 4000 | 0.625      |
| chr9:108623290-108627290 | 4000 | 0.725      |
| chr9:108917290-108921290 | 4000 | 0.425      |
| chr9:108966290-108970290 | 4000 | 0.65       |
| chr9:109587290-109590290 | 3000 | 0.6        |
| chr9:111035290-111038290 | 3000 | 0.36666667 |
| chr9:111133290-111136290 | 3000 | 0.36666667 |
| chr9:111680290-111685290 | 5000 | 0.32       |
| chrX:2647001-2650001     | 3000 | 0.6        |
| chrX:2904001-2907001     | 3000 | 0.4        |
| chrX:3161001-3164001     | 3000 | 1.03333333 |
| chrX:3944001-3948001     | 4000 | 0.2        |
| chrX:8087999-8091999     | 4000 | 0.725      |

|                        |      |            |
|------------------------|------|------------|
| chrX:9754999-9757999   | 3000 | 0.36666667 |
| chrX:10974999-10983999 | 9000 | 0.44444444 |
| chrX:14568999-14573999 | 5000 | 0.3        |
| chrX:14843999-14848999 | 5000 | 0.3        |
| chrX:15826999-15830999 | 4000 | 0.425      |
| chrX:16433999-16438999 | 5000 | 0.32       |
| chrX:16447999-16451999 | 4000 | 0.5        |
| chrX:16794999-16797999 | 3000 | 0.43333333 |
| chrX:17297999-17300999 | 3000 | 0.43333333 |
| chrX:20593999-20596999 | 3000 | 0.36666667 |
| chrX:21866999-21869999 | 3000 | 0.63333333 |
| chrX:21938999-21941999 | 3000 | 1.16666667 |
| chrX:22493999-22497999 | 4000 | 0.6        |
| chrX:22590999-22593999 | 3000 | 1.2        |
| chrX:22606999-22609999 | 3000 | 1.26666667 |
| chrX:23011999-23014999 | 3000 | 0.8        |
| chrX:23168999-23171999 | 3000 | 1.06666667 |
| chrX:23242999-23248999 | 6000 | 0.65       |
| chrX:23350999-23355999 | 5000 | 0.68       |
| chrX:23483999-23486999 | 3000 | 0.7        |
| chrX:23885999-23889999 | 4000 | 0.45       |
| chrX:24236999-24239999 | 3000 | 0.7        |
| chrX:24754999-24758999 | 4000 | 0.35       |
| chrX:25712999-25718999 | 6000 | 0.71666667 |
| chrX:26084999-26087999 | 3000 | 0.36666667 |
| chrX:27719077-27723077 | 4000 | 0.525      |
| chrX:28246077-28249077 | 3000 | 0.6        |
| chrX:34263077-34266077 | 3000 | 0.66666667 |
| chrX:34521077-34524077 | 3000 | 0.93333333 |
| chrX:35062093-35065093 | 3000 | 0.76666667 |
| chrX:36041093-36044093 | 3000 | 0.86666667 |
| chrX:37749093-37752093 | 3000 | 0.8        |
| chrX:41065093-41068093 | 3000 | 0.66666667 |
| chrX:41184093-41188093 | 4000 | 0.9        |
| chrX:45928093-45931093 | 3000 | 0.66666667 |
| chrX:46087093-46090093 | 3000 | 1.13333333 |
| chrX:46565093-46570093 | 5000 | 0.72       |
| chrX:47949361-47952361 | 3000 | 0.63333333 |
| chrX:49494361-49497361 | 3000 | 0.43333333 |
| chrX:49549361-49553361 | 4000 | 0.4        |
| chrX:50616361-50619361 | 3000 | 0.46666667 |
| chrX:50940361-50943361 | 3000 | 0.63333333 |
| chrX:51390361-51393361 | 3000 | 0.66666667 |
| chrX:52414361-52417361 | 3000 | 0.93333333 |
| chrX:54803361-54806361 | 3000 | 0.43333333 |
| chrX:55010361-55013361 | 3000 | 0.8        |
| chrX:56603361-56606361 | 3000 | 0.5        |
| chrX:61473209-61476209 | 3000 | 0.4        |
| chrX:62970209-62973209 | 3000 | 0.7        |
| chrX:63518209-63521209 | 3000 | 0.73333333 |
| chrX:64531209-64534209 | 3000 | 0.73333333 |
| chrX:66718209-66721209 | 3000 | 0.53333333 |
| chrX:67043209-67046209 | 3000 | 0.2        |

|                          |      |            |
|--------------------------|------|------------|
| chrX:67054209-67057209   | 3000 | 0.36666667 |
| chrX:72499209-72504209   | 5000 | 0.42       |
| chrX:74306209-74311209   | 5000 | 0.28       |
| chrX:79719209-79722209   | 3000 | 0.4        |
| chrX:80268209-80271209   | 3000 | 0.33333333 |
| chrX:81744209-81747209   | 3000 | 0.83333333 |
| chrX:82552209-82555209   | 3000 | 0.4        |
| chrX:82901209-82905209   | 4000 | 0.875      |
| chrX:85892209-85895209   | 3000 | 0.76666667 |
| chrX:86796209-86800209   | 4000 | 0.6        |
| chrX:87009209-87013209   | 4000 | 0.85       |
| chrX:89246209-89249209   | 3000 | 0.5        |
| chrX:89710430-89713430   | 3000 | 0.7        |
| chrX:90613430-90618430   | 5000 | 0.66       |
| chrX:90632430-90635430   | 3000 | 0.43333333 |
| chrX:91176430-91180430   | 4000 | 0.75       |
| chrX:93286430-93290430   | 4000 | 0.525      |
| chrX:93810430-93813430   | 3000 | 0.16666667 |
| chrX:94046430-94049430   | 3000 | 1.16666667 |
| chrX:95621430-95625430   | 4000 | 0.55       |
| chrX:97315430-97319430   | 4000 | 0.5        |
| chrX:98140430-98143430   | 3000 | 0.73333333 |
| chrX:98785430-98788430   | 3000 | 0.46666667 |
| chrX:98916430-98919430   | 3000 | 0.46666667 |
| chrX:99790430-99793430   | 3000 | 0.43333333 |
| chrX:100817430-100820430 | 3000 | 0.7        |
| chrX:101612430-101615430 | 3000 | 0.5        |
| chrX:101686430-101689430 | 3000 | 0.43333333 |
| chrX:108192430-108195430 | 3000 | 0.16666667 |
| chrX:108513430-108517430 | 4000 | 0.25       |
| chrX:108609430-108612430 | 3000 | 0.36666667 |
| chrX:111708430-111711430 | 3000 | 0.26666667 |
| chrX:113775430-113778430 | 3000 | 0.36666667 |
| chrX:119290430-119294430 | 4000 | 0.4        |
| chrX:119779430-119782430 | 3000 | 0.5        |
| chrX:122769470-122772470 | 3000 | 0.53333333 |
| chrX:125774510-125777510 | 3000 | 0.36666667 |
| chrX:126328510-126331510 | 3000 | 0.56666667 |
| chrX:126936510-126939510 | 3000 | 0.23333333 |
| chrX:127582510-127585510 | 3000 | 0.63333333 |
| chrX:128440510-128443510 | 3000 | 0.96666667 |
| chrX:132579510-132582510 | 3000 | 0.36666667 |
| chrX:132737510-132740510 | 3000 | 0.3        |
| chrX:133683510-133686510 | 3000 | 0.43333333 |
| chrX:133709510-133712510 | 3000 | 0.5        |
| chrX:134407510-134410510 | 3000 | 0.6        |
| chrX:134412510-134415510 | 3000 | 0.46666667 |
| chrX:134870510-134873510 | 3000 | 1          |
| chrX:137845510-137848510 | 3000 | 0.7        |
| chrX:143820510-143823510 | 3000 | 0.83333333 |
| chrX:145264510-145267510 | 3000 | 0.6        |
| chrX:146085510-146088510 | 3000 | 0.46666667 |
| chrX:146818510-146822510 | 4000 | 0.375      |

|                          |      |            |
|--------------------------|------|------------|
| chrX:147242510-147245510 | 3000 | 0.46666667 |
| chrX:147539510-147542510 | 3000 | 0.3        |
| chrX:149811510-149815510 | 4000 | 0.5        |
| chrX:152269510-152272510 | 3000 | 0.23333333 |
| chrX:154822510-154825510 | 3000 | 0.26666667 |
| chrX:155151510-155155510 | 4000 | 0.425      |
| chrX:156938510-156941510 | 3000 | 0.56666667 |
| chrX:159729510-159733510 | 4000 | 0.6        |
| chrX:159989510-159992510 | 3000 | 0.66666667 |

## (B) Sertoli-Granulosa final list of susceptible DMRs (includes 3+ consecutive sites only) (1503)

| Potential DMR site     | Length | CpG/100bp  |
|------------------------|--------|------------|
| chr1:401001-405001     | 4000   | 2.525      |
| chr1:558001-561001     | 3000   | 2.8        |
| chr1:660001-664001     | 4000   | 1.025      |
| chr1:846001-849001     | 3000   | 2.7666667  |
| chr1:1069001-1073001   | 4000   | 3.775      |
| chr1:1127001-1131001   | 4000   | 0.725      |
| chr1:2205001-2208001   | 3000   | 1.1666667  |
| chr1:2928364-2931364   | 3000   | 0.43333333 |
| chr1:4537364-4540364   | 3000   | 0.5        |
| chr1:4665364-4668364   | 3000   | 1.9        |
| chr1:7018364-7022364   | 4000   | 1.75       |
| chr1:7776364-7781364   | 5000   | 1.74       |
| chr1:7829364-7832364   | 3000   | 0.8666667  |
| chr1:10267364-10271364 | 4000   | 1.45       |
| chr1:10393364-10396364 | 3000   | 3          |
| chr1:11423364-11427364 | 4000   | 1.6        |
| chr1:12036364-12040364 | 4000   | 0.475      |
| chr1:13055364-13058364 | 3000   | 0.9666667  |
| chr1:13921364-13925364 | 4000   | 1.2        |
| chr1:15570364-15576364 | 6000   | 1.4        |
| chr1:18837364-18841364 | 4000   | 0.725      |
| chr1:19975364-19979364 | 4000   | 0.3        |
| chr1:21487364-21492364 | 5000   | 1.42       |
| chr1:21843364-21847364 | 4000   | 1.95       |
| chr1:21907364-21910364 | 3000   | 0.53333333 |
| chr1:21948364-21951364 | 3000   | 1.3        |
| chr1:23438364-23442364 | 4000   | 0.925      |
| chr1:25061364-25064364 | 3000   | 1.7666667  |
| chr1:26744364-26749364 | 5000   | 1.32       |
| chr1:27032364-27036364 | 4000   | 1.925      |
| chr1:27203364-27207364 | 4000   | 0.85       |
| chr1:29318364-29321364 | 3000   | 0.3666667  |
| chr1:29641364-29644364 | 3000   | 1.6666667  |
| chr1:32550364-32553364 | 3000   | 1.4666667  |
| chr1:33271364-33275364 | 4000   | 0.3        |
| chr1:40087862-40090862 | 3000   | 0.8666667  |
| chr1:43617862-43620862 | 3000   | 0.3        |
| chr1:45708862-45712862 | 4000   | 1          |
| chr1:46273862-46276862 | 3000   | 1.5        |
| chr1:47567862-47572862 | 5000   | 1.44       |
| chr1:48163862-48168862 | 5000   | 1.42       |
| chr1:49864862-49868862 | 4000   | 1.15       |
| chr1:54491862-54495862 | 4000   | 1.5        |
| chr1:56597862-56601862 | 4000   | 0.775      |
| chr1:58235862-58239862 | 4000   | 1.675      |
| chr1:58790862-58793862 | 3000   | 1.6666667  |
| chr1:59303862-59306862 | 3000   | 0.3        |
| chr1:61906862-61910862 | 4000   | 1.225      |
| chr1:64995862-64998862 | 3000   | 1          |

|                          |      |            |
|--------------------------|------|------------|
| chr1:65079862-65083862   | 4000 | 1.5        |
| chr1:69328356-69332356   | 4000 | 1.325      |
| chr1:70057549-70060549   | 3000 | 1.33333333 |
| chr1:70550549-70553549   | 3000 | 3.03333333 |
| chr1:70726549-70730549   | 4000 | 1.575      |
| chr1:70984549-70987549   | 3000 | 0.36666667 |
| chr1:72720549-72723549   | 3000 | 1.56666667 |
| chr1:72918549-72923549   | 5000 | 0.8        |
| chr1:73099549-73102549   | 3000 | 1.96666667 |
| chr1:74268549-74271549   | 3000 | 0.56666667 |
| chr1:74387549-74391549   | 4000 | 2.325      |
| chr1:77996300-78000300   | 4000 | 0.375      |
| chr1:79118686-79123686   | 5000 | 1.22       |
| chr1:80800095-80804095   | 4000 | 1.35       |
| chr1:80811095-80814095   | 3000 | 1.1        |
| chr1:82989561-82995561   | 6000 | 1.6        |
| chr1:83028561-83033561   | 5000 | 0.4        |
| chr1:83328561-83331561   | 3000 | 1.2        |
| chr1:84721637-84726637   | 5000 | 1.28       |
| chr1:84813637-84816637   | 3000 | 0.56666667 |
| chr1:84903637-84906637   | 3000 | 1.56666667 |
| chr1:85334778-85337778   | 3000 | 0.73333333 |
| chr1:85906444-85909444   | 3000 | 1.46666667 |
| chr1:86344444-86347444   | 3000 | 0.96666667 |
| chr1:86348444-86353444   | 5000 | 0.32       |
| chr1:92795575-92798575   | 3000 | 0.43333333 |
| chr1:93516575-93519575   | 3000 | 1.33333333 |
| chr1:94181305-94188305   | 7000 | 0.64285714 |
| chr1:94502305-94506305   | 4000 | 0.85       |
| chr1:98268655-98271655   | 3000 | 0.7        |
| chr1:98392655-98395655   | 3000 | 1.66666667 |
| chr1:102346655-102349655 | 3000 | 0.5        |
| chr1:104577655-104581655 | 4000 | 0.45       |
| chr1:105393655-105397655 | 4000 | 0.675      |
| chr1:110606655-110610655 | 4000 | 0.6        |
| chr1:111342655-111345655 | 3000 | 1.86666667 |
| chr1:114350655-114353655 | 3000 | 1          |
| chr1:115038655-115041655 | 3000 | 1.1        |
| chr1:116811655-116814655 | 3000 | 0.96666667 |
| chr1:117534655-117539655 | 5000 | 1.5        |
| chr1:120997877-121000877 | 3000 | 0.56666667 |
| chr1:129088929-129093929 | 5000 | 1.22       |
| chr1:130585929-130588929 | 3000 | 0.63333333 |
| chr1:130968752-130973752 | 5000 | 1.36       |
| chr1:133066752-133069752 | 3000 | 1.63333333 |
| chr1:137155759-137158759 | 3000 | 0.43333333 |
| chr1:142653187-142658187 | 5000 | 0.36       |
| chr1:145462187-145465187 | 3000 | 1.7        |
| chr1:146549187-146552187 | 3000 | 0.6        |
| chr1:146645042-146649042 | 4000 | 1.05       |
| chr1:155264042-155268042 | 4000 | 0.575      |
| chr1:155478042-155482042 | 4000 | 0.4        |
| chr1:157187211-157190211 | 3000 | 1.03333333 |



|                          |      |            |
|--------------------------|------|------------|
| chr1:157520211-157524211 | 4000 | 0.65       |
| chr1:159078211-159081211 | 3000 | 0.96666667 |
| chr1:160151975-160157975 | 6000 | 1.23333333 |
| chr1:162596803-162599803 | 3000 | 0.56666667 |
| chr1:163659846-163664846 | 5000 | 2.56       |
| chr1:163758846-163761846 | 3000 | 1.56666667 |
| chr1:168047550-168053550 | 6000 | 1.38333333 |
| chr1:169830550-169833550 | 3000 | 0.73333333 |
| chr1:171985550-171992550 | 7000 | 1.04285714 |
| chr1:178016061-178023061 | 7000 | 0.84285714 |
| chr1:179875061-179878061 | 3000 | 0.63333333 |
| chr1:180614061-180618061 | 4000 | 1.35       |
| chr1:185107061-185110061 | 3000 | 1.43333333 |
| chr1:186018919-186021919 | 3000 | 1.33333333 |
| chr1:186634919-186638919 | 4000 | 0.8        |
| chr1:186986919-186989919 | 3000 | 0.96666667 |
| chr1:189876919-189879919 | 3000 | 0.96666667 |
| chr1:199976432-199979432 | 3000 | 1.06666667 |
| chr1:202547803-202550803 | 3000 | 0.73333333 |
| chr1:202981545-202984545 | 3000 | 1.33333333 |
| chr1:208257267-208261267 | 4000 | 0.65       |
| chr1:211208677-211212677 | 4000 | 1.525      |
| chr1:213382321-213385321 | 3000 | 0.83333333 |
| chr1:216963879-216969879 | 6000 | 0.26666667 |
| chr1:220379879-220382879 | 3000 | 1.7        |
| chr1:220551879-220554879 | 3000 | 0.33333333 |
| chr1:224078879-224081879 | 3000 | 1.13333333 |
| chr1:232616745-232619745 | 3000 | 1          |
| chr1:233174745-233180745 | 6000 | 1.51666667 |
| chr1:233188745-233195745 | 7000 | 0.9        |
| chr1:237857745-237860745 | 3000 | 0.66666667 |
| chr1:238428745-238431745 | 3000 | 0.66666667 |
| chr1:241016745-241020745 | 4000 | 0.35       |
| chr1:246124808-246127808 | 3000 | 0.53333333 |
| chr1:247915808-247919808 | 4000 | 0.325      |
| chr1:247931808-247934808 | 3000 | 1.03333333 |
| chr1:249015403-249021403 | 6000 | 1.01666667 |
| chr1:250020054-250023054 | 3000 | 1.3        |
| chr1:251511850-251516850 | 5000 | 1.04       |
| chr1:254375776-254378776 | 3000 | 1.26666667 |
| chr1:263143846-263146846 | 3000 | 0.63333333 |
| chr1:265218846-265222846 | 4000 | 0.675      |
| chr2:668001-674001       | 6000 | 0.95       |
| chr2:2306001-2309001     | 3000 | 1.5        |
| chr2:2820001-2824001     | 4000 | 1.075      |
| chr2:2825001-2828001     | 3000 | 1.53333333 |
| chr2:3110001-3113001     | 3000 | 0.46666667 |
| chr2:6948001-6952001     | 4000 | 1.15       |
| chr2:7050001-7054001     | 4000 | 0.35       |
| chr2:8092001-8097001     | 5000 | 2.7        |
| chr2:8305001-8309001     | 4000 | 1.775      |
| chr2:8871001-8875001     | 4000 | 0.675      |
| chr2:9881001-9884001     | 3000 | 0.3        |

|                          |      |            |
|--------------------------|------|------------|
| chr2:10063001-10067001   | 4000 | 0.875      |
| chr2:13932001-13935001   | 3000 | 0.6        |
| chr2:14425001-14428001   | 3000 | 0.46666667 |
| chr2:14476001-14479001   | 3000 | 1          |
| chr2:14610001-14613001   | 3000 | 1.83333333 |
| chr2:16427001-16433001   | 6000 | 1.3        |
| chr2:17166001-17169001   | 3000 | 1.5        |
| chr2:17772001-17776001   | 4000 | 0.4        |
| chr2:18680001-18683001   | 3000 | 2.5        |
| chr2:22365001-22369001   | 4000 | 0.7        |
| chr2:23168001-23173001   | 5000 | 1.58       |
| chr2:23196001-23200001   | 4000 | 0.5        |
| chr2:23295001-23299001   | 4000 | 1.35       |
| chr2:24116001-24119001   | 3000 | 0.8        |
| chr2:32311655-32314655   | 3000 | 1.13333333 |
| chr2:33059655-33062655   | 3000 | 0.2        |
| chr2:37745655-37750655   | 5000 | 1.56       |
| chr2:38250655-38253655   | 3000 | 1.26666667 |
| chr2:43617655-43620655   | 3000 | 0.56666667 |
| chr2:44468655-44474655   | 6000 | 1.28333333 |
| chr2:45222655-45225655   | 3000 | 1.16666667 |
| chr2:51878655-51881655   | 3000 | 1.2        |
| chr2:54527655-54531655   | 4000 | 0.875      |
| chr2:55522655-55525655   | 3000 | 0.93333333 |
| chr2:58927311-58932311   | 5000 | 1.6        |
| chr2:64933724-64936724   | 3000 | 1.63333333 |
| chr2:65310724-65313724   | 3000 | 0.33333333 |
| chr2:66039724-66042724   | 3000 | 1.9        |
| chr2:67059724-67062724   | 3000 | 0.53333333 |
| chr2:70511724-70514724   | 3000 | 1.7        |
| chr2:70725724-70728724   | 3000 | 1.03333333 |
| chr2:76478724-76481724   | 3000 | 1.43333333 |
| chr2:77225724-77230724   | 5000 | 0.76       |
| chr2:80215724-80218724   | 3000 | 0.93333333 |
| chr2:84246724-84249724   | 3000 | 0.46666667 |
| chr2:86012724-86015724   | 3000 | 1.4        |
| chr2:86304724-86307724   | 3000 | 1.13333333 |
| chr2:86316724-86319724   | 3000 | 0.5        |
| chr2:86452724-86456724   | 4000 | 2.2        |
| chr2:86548724-86552724   | 4000 | 1.525      |
| chr2:87103724-87106724   | 3000 | 0.5        |
| chr2:87465724-87468724   | 3000 | 1.63333333 |
| chr2:93428724-93431724   | 3000 | 1.1        |
| chr2:94894724-94899724   | 5000 | 1.12       |
| chr2:96849724-96852724   | 3000 | 0.66666667 |
| chr2:100470724-100473724 | 3000 | 0.53333333 |
| chr2:103883724-103888724 | 5000 | 0.96       |
| chr2:104219724-104222724 | 3000 | 0.36666667 |
| chr2:105053724-105056724 | 3000 | 0.3        |
| chr2:105616724-105619724 | 3000 | 0.83333333 |
| chr2:105875724-105878724 | 3000 | 0.43333333 |
| chr2:107518724-107521724 | 3000 | 0.5        |
| chr2:108655724-108659724 | 4000 | 1.15       |

|                          |      |            |
|--------------------------|------|------------|
| chr2:112712724-112716724 | 4000 | 0.85       |
| chr2:113766724-113769724 | 3000 | 0.73333333 |
| chr2:116128724-116131724 | 3000 | 0.96666667 |
| chr2:118163112-118166112 | 3000 | 0.3        |
| chr2:119346541-119352541 | 6000 | 1.95       |
| chr2:122591541-122595541 | 4000 | 0.525      |
| chr2:122870541-122873541 | 3000 | 0.76666667 |
| chr2:123816541-123819541 | 3000 | 1          |
| chr2:124536541-124539541 | 3000 | 0.2        |
| chr2:128827541-128831541 | 4000 | 2.1        |
| chr2:130214541-130217541 | 3000 | 0.3        |
| chr2:136832541-136838541 | 6000 | 1.06666667 |
| chr2:138591541-138594541 | 3000 | 0.76666667 |
| chr2:140088541-140091541 | 3000 | 1.2        |
| chr2:144315541-144318541 | 3000 | 0.56666667 |
| chr2:145350541-145354541 | 4000 | 0.225      |
| chr2:145926541-145929541 | 3000 | 0.4        |
| chr2:149231110-149234110 | 3000 | 0.7        |
| chr2:149361110-149364110 | 3000 | 0.53333333 |
| chr2:150664110-150670110 | 6000 | 1.16666667 |
| chr2:159734110-159737110 | 3000 | 1.6        |
| chr2:160530110-160536110 | 6000 | 1.46666667 |
| chr2:165119110-165122110 | 3000 | 0.56666667 |
| chr2:165811110-165814110 | 3000 | 0.5        |
| chr2:166303110-166306110 | 3000 | 1.43333333 |
| chr2:167409110-167412110 | 3000 | 0.4        |
| chr2:169449110-169452110 | 3000 | 1.3        |
| chr2:169492110-169495110 | 3000 | 0.33333333 |
| chr2:172245110-172250110 | 5000 | 1.32       |
| chr2:180801275-180804275 | 3000 | 0.7        |
| chr2:180942275-180946275 | 4000 | 1.25       |
| chr2:183649893-183652893 | 3000 | 1.06666667 |
| chr2:184632893-184636893 | 4000 | 1.475      |
| chr2:189570893-189573893 | 3000 | 0.7        |
| chr2:189700893-189707893 | 7000 | 1          |
| chr2:189790893-189793893 | 3000 | 0.86666667 |
| chr2:190307893-190310893 | 3000 | 1.3        |
| chr2:191071186-191075186 | 4000 | 1.55       |
| chr2:191208186-191212186 | 4000 | 0.975      |
| chr2:191905508-191909508 | 4000 | 0.6        |
| chr2:193219286-193223286 | 4000 | 1.175      |
| chr2:193753286-193758286 | 5000 | 1.42       |
| chr2:197157286-197162286 | 5000 | 1.18       |
| chr2:198538652-198541652 | 3000 | 0.3        |
| chr2:199714652-199717652 | 3000 | 0.53333333 |
| chr2:200247536-200251536 | 4000 | 1.2        |
| chr2:201700536-201705536 | 5000 | 1.34       |
| chr2:201999536-202002536 | 3000 | 0.4        |
| chr2:204701186-204705186 | 4000 | 0.375      |
| chr2:206941249-206944249 | 3000 | 0.33333333 |
| chr2:207182249-207185249 | 3000 | 0.66666667 |
| chr2:208301249-208304249 | 3000 | 2.66666667 |
| chr2:209843249-209846249 | 3000 | 0.96666667 |

|                          |      |            |
|--------------------------|------|------------|
| chr2:209898249-209902249 | 4000 | 0.375      |
| chr2:210310249-210313249 | 3000 | 0.4        |
| chr2:210518249-210522249 | 4000 | 0.875      |
| chr2:213317249-213323249 | 6000 | 1.61666667 |
| chr2:216034249-216037249 | 3000 | 2.66666667 |
| chr2:216955249-216958249 | 3000 | 0.76666667 |
| chr2:218012249-218015249 | 3000 | 1.4        |
| chr2:218508249-218511249 | 3000 | 1.06666667 |
| chr2:222001205-222004205 | 3000 | 1.76666667 |
| chr2:223388205-223391205 | 3000 | 0.56666667 |
| chr2:226761205-226764205 | 3000 | 1.53333333 |
| chr2:228189205-228192205 | 3000 | 1.03333333 |
| chr2:229937202-229942202 | 5000 | 1.34       |
| chr2:230805202-230813202 | 8000 | 1          |
| chr2:235556202-235560202 | 4000 | 1.375      |
| chr2:236227202-236230202 | 3000 | 1.33333333 |
| chr2:237456202-237459202 | 3000 | 1.06666667 |
| chr2:240106202-240112202 | 6000 | 1.4        |
| chr2:240433202-240440202 | 7000 | 1.34285714 |
| chr2:249965202-249968202 | 3000 | 0.63333333 |
| chr2:251721202-251725202 | 4000 | 3.025      |
| chr2:255923112-255927112 | 4000 | 0.95       |
| chr2:256990112-256993112 | 3000 | 0.76666667 |
| chr2:257401112-257407112 | 6000 | 1.46666667 |
| chr3:1193001-1197001     | 4000 | 0.25       |
| chr3:2130001-2134001     | 4000 | 0.775      |
| chr3:2737001-2740001     | 3000 | 0.7        |
| chr3:5614626-5619626     | 5000 | 0.86       |
| chr3:12913943-12916943   | 3000 | 1.16666667 |
| chr3:14015943-14018943   | 3000 | 0.8        |
| chr3:14848699-14851699   | 3000 | 1.3        |
| chr3:16461851-16464851   | 3000 | 0.23333333 |
| chr3:16959388-16962388   | 3000 | 0.93333333 |
| chr3:17408388-17412388   | 4000 | 0.8        |
| chr3:19107952-19111952   | 4000 | 0.525      |
| chr3:19211952-19214952   | 3000 | 0.23333333 |
| chr3:19614952-19617952   | 3000 | 0.56666667 |
| chr3:20442952-20445952   | 3000 | 0.73333333 |
| chr3:21728952-21731952   | 3000 | 1.46666667 |
| chr3:22221952-22224952   | 3000 | 1.66666667 |
| chr3:25324952-25327952   | 3000 | 0.5        |
| chr3:27411952-27415952   | 4000 | 1.05       |
| chr3:27854952-27857952   | 3000 | 1.73333333 |
| chr3:28468952-28472952   | 4000 | 2.05       |
| chr3:28488952-28491952   | 3000 | 0.53333333 |
| chr3:30974852-30979852   | 5000 | 1.1        |
| chr3:34262852-34266852   | 4000 | 0.15       |
| chr3:34267852-34270852   | 3000 | 0.6        |
| chr3:37365852-37368852   | 3000 | 1.3        |
| chr3:38485852-38489852   | 4000 | 1.225      |
| chr3:44010678-44013678   | 3000 | 0.16666667 |
| chr3:44026678-44030678   | 4000 | 0.9        |
| chr3:50242678-50248678   | 6000 | 0.33333333 |

|                          |       |            |
|--------------------------|-------|------------|
| chr3:51222678-51226678   | 4000  | 0.65       |
| chr3:52770647-52773647   | 3000  | 0.96666667 |
| chr3:53706647-53709647   | 3000  | 0.36666667 |
| chr3:55157647-55160647   | 3000  | 0.76666667 |
| chr3:58399116-58402116   | 3000  | 0.93333333 |
| chr3:59320116-59324116   | 4000  | 1.25       |
| chr3:66643116-66646116   | 3000  | 0.83333333 |
| chr3:66741116-66745116   | 4000  | 1.575      |
| chr3:67671116-67674116   | 3000  | 1.33333333 |
| chr3:68746116-68749116   | 3000  | 0.4        |
| chr3:68929116-68932116   | 3000  | 0.26666667 |
| chr3:73798116-73802116   | 4000  | 1.1        |
| chr3:77250116-77253116   | 3000  | 1.36666667 |
| chr3:80734116-80737116   | 3000  | 0.56666667 |
| chr3:83780116-83783116   | 3000  | 0.46666667 |
| chr3:84416116-84420116   | 4000  | 1.075      |
| chr3:85064116-85067116   | 3000  | 1.2        |
| chr3:89119116-89122116   | 3000  | 1          |
| chr3:90002375-90012375   | 10000 | 0.67       |
| chr3:90807901-90810901   | 3000  | 0.8        |
| chr3:92022901-92026901   | 4000  | 0.5        |
| chr3:93752901-93755901   | 3000  | 0.3        |
| chr3:95492901-95496901   | 4000  | 0.575      |
| chr3:97463901-97466901   | 3000  | 1.6        |
| chr3:100088901-100092901 | 4000  | 1.05       |
| chr3:105313577-105316577 | 3000  | 0.3        |
| chr3:109285259-109288259 | 3000  | 2.26666667 |
| chr3:109317259-109320259 | 3000  | 1.1        |
| chr3:109323259-109326259 | 3000  | 0.43333333 |
| chr3:110134259-110138259 | 4000  | 2.4        |
| chr3:116208278-116211278 | 3000  | 0.53333333 |
| chr3:117045278-117048278 | 3000  | 0.4        |
| chr3:117128278-117132278 | 4000  | 0.55       |
| chr3:118704278-118710278 | 6000  | 0.7        |
| chr3:124394278-124397278 | 3000  | 1          |
| chr3:133079278-133082278 | 3000  | 0.73333333 |
| chr3:135125278-135129278 | 4000  | 0.475      |
| chr3:137391278-137394278 | 3000  | 0.66666667 |
| chr3:137837278-137842278 | 5000  | 1.5        |
| chr3:140649278-140653278 | 4000  | 0.725      |
| chr3:142855186-142859186 | 4000  | 0.9        |
| chr3:145390571-145396571 | 6000  | 1.43333333 |
| chr3:149085174-149088174 | 3000  | 1.46666667 |
| chr3:155313826-155317826 | 4000  | 0.925      |
| chr3:155396074-155399074 | 3000  | 0.83333333 |
| chr3:156549074-156552074 | 3000  | 1.33333333 |
| chr3:158406074-158411074 | 5000  | 1.24       |
| chr3:158567074-158571074 | 4000  | 1.625      |
| chr3:159603824-159609824 | 6000  | 1.16666667 |
| chr3:160575824-160578824 | 3000  | 0.83333333 |
| chr3:161859801-161863801 | 4000  | 1.35       |
| chr3:163988506-163991506 | 3000  | 0.9        |
| chr4:75525941-75533941   | 8000  | 0.825      |

|                          |       |            |
|--------------------------|-------|------------|
| chr4:38575302-38578302   | 3000  | 0.93333333 |
| chr4:154671248-154686248 | 15000 | 1.48666667 |
| chr4:121872876-121882876 | 10000 | 1.27       |
| chr4:181026105-181033105 | 7000  | 1.45714286 |
| chr4:134664436-134671436 | 7000  | 1.37142857 |
| chr4:142194436-142204436 | 10000 | 0.62       |
| chr4:108153472-108157472 | 4000  | 1.275      |
| chr4:165698961-165701961 | 3000  | 1.16666667 |
| chr4:102273316-102282316 | 9000  | 0.36666667 |
| chr4:2656001-2665001     | 9000  | 0.87777778 |
| chr4:65379941-65384941   | 5000  | 1.18       |
| chr4:78767299-78777299   | 10000 | 0.94       |
| chr4:8999703-9007703     | 8000  | 1.75       |
| chr4:113984472-113988472 | 4000  | 0.225      |
| chr4:157700248-157704248 | 4000  | 1.45       |
| chr4:186587105-186590105 | 3000  | 0.5        |
| chr4:114003472-114013472 | 10000 | 0.64       |
| chr4:110158472-110173472 | 15000 | 0.44666667 |
| chr4:155601248-155606248 | 5000  | 1.28       |
| chr4:118075006-118083006 | 8000  | 0.9125     |
| chr4:6412703-6417703     | 5000  | 1.32       |
| chr4:155864248-155871248 | 7000  | 1.2        |
| chr4:116857472-116871472 | 14000 | 1.1        |
| chr4:48696444-48701444   | 5000  | 0.56       |
| chr4:144226436-144229436 | 3000  | 0.83333333 |
| chr4:76312941-76327941   | 15000 | 0.59333333 |
| chr4:106272472-106278472 | 6000  | 0.93333333 |
| chr4:182947105-182952105 | 5000  | 1.34       |
| chr4:95471316-95478316   | 7000  | 0.45714286 |
| chr4:65164941-65174941   | 10000 | 0.31       |
| chr4:184835105-184840105 | 5000  | 0.84       |
| chr4:134741436-134750436 | 9000  | 0.6        |
| chr4:179530105-179547105 | 17000 | 0.71176471 |
| chr4:105406747-105415747 | 9000  | 1.17777778 |
| chr4:147750436-147753436 | 3000  | 0.93333333 |
| chr4:116808472-116816472 | 8000  | 0.925      |
| chr4:173724105-173735105 | 11000 | 1.25454545 |
| chr4:151219818-151224818 | 5000  | 0.46       |
| chr4:186420105-186437105 | 17000 | 0.91176471 |
| chr4:185551105-185563105 | 12000 | 0.93333333 |
| chr4:65235941-65249941   | 14000 | 1.02142857 |
| chr4:186594105-186600105 | 6000  | 0.53333333 |
| chr4:4952001-4963001     | 11000 | 0.45454545 |
| chr4:116368472-116382472 | 14000 | 1.45714286 |
| chr4:65220941-65233941   | 13000 | 0.59230769 |
| chr4:581001-587001       | 6000  | 0.4        |
| chr4:116787472-116802472 | 15000 | 1.08       |
| chr4:106295472-106303472 | 8000  | 1.15       |
| chr4:154435248-154439248 | 4000  | 0.975      |
| chr4:2637001-2642001     | 5000  | 1          |
| chr4:116821472-116833472 | 12000 | 1.2        |
| chr4:175761105-175770105 | 9000  | 1.18888889 |
| chr4:6477703-6487703     | 10000 | 1.42       |

|                          |       |            |
|--------------------------|-------|------------|
| chr4:6239703-6249703     | 10000 | 1.01       |
| chr4:135207436-135222436 | 15000 | 0.96       |
| chr4:1004001-1007001     | 3000  | 0.63333333 |
| chr4:4160001-4165001     | 5000  | 0.64       |
| chr4:134862436-134865436 | 3000  | 0.8        |
| chr4:77807299-77814299   | 7000  | 0.78571429 |
| chr4:173318105-173324105 | 6000  | 1.1        |
| chr4:78502299-78513299   | 11000 | 1.27272727 |
| chr4:139284436-139292436 | 8000  | 0.6875     |
| chr4:1080001-1083001     | 3000  | 0.66666667 |
| chr4:105294747-105307747 | 13000 | 1.23076923 |
| chr4:143195436-143206436 | 11000 | 0.69090909 |
| chr4:174027105-174043105 | 16000 | 1.49375    |
| chr4:183022105-183038105 | 16000 | 1.7625     |
| chr4:76477941-76482941   | 5000  | 1.42       |
| chr4:77818299-77826299   | 8000  | 0.7375     |
| chr4:88472316-88479316   | 7000  | 0.4        |
| chr4:156819248-156825248 | 6000  | 0.85       |
| chr4:171891105-171898105 | 7000  | 1.1        |
| chr4:126987436-126991436 | 4000  | 1.05       |
| chr4:65209941-65213941   | 4000  | 1.1        |
| chr4:92092316-92107316   | 15000 | 0.45333333 |
| chr4:177964105-177978105 | 14000 | 1.42857143 |
| chr4:122144876-122160876 | 16000 | 0.93125    |
| chr4:135334436-135341436 | 7000  | 0.8        |
| chr4:185098105-185115105 | 17000 | 1.78823529 |
| chr4:78975299-78988299   | 13000 | 1.2        |
| chr4:186380105-186388105 | 8000  | 0.825      |
| chr4:46753302-46759302   | 6000  | 0.61666667 |
| chr4:115593472-115596472 | 3000  | 0.46666667 |
| chr4:126553436-126556436 | 3000  | 0.76666667 |
| chr4:120483308-120493308 | 10000 | 0.72       |
| chr4:6295703-6301703     | 6000  | 1.53333333 |
| chr5:134001-137001       | 3000  | 1.4        |
| chr5:910001-915001       | 5000  | 1.44       |
| chr5:1273001-1276001     | 3000  | 0.66666667 |
| chr5:1335001-1340001     | 5000  | 2.6        |
| chr5:2205991-2210991     | 5000  | 1.4        |
| chr5:2751991-2755991     | 4000  | 1.075      |
| chr5:5367991-5371991     | 4000  | 1.375      |
| chr5:5386991-5389991     | 3000  | 1.2        |
| chr5:6173991-6177991     | 4000  | 1.1        |
| chr5:6229991-6234991     | 5000  | 0.62       |
| chr5:6809991-6812991     | 3000  | 0.33333333 |
| chr5:7872991-7876991     | 4000  | 1.4        |
| chr5:10528991-10532991   | 4000  | 2.175      |
| chr5:11077991-11082991   | 5000  | 1.82       |
| chr5:11563991-11567991   | 4000  | 0.5        |
| chr5:13248991-13252991   | 4000  | 1.8        |
| chr5:15772991-15776991   | 4000  | 2.275      |
| chr5:15880991-15884991   | 4000  | 1.7        |
| chr5:18381991-18385991   | 4000  | 2.1        |
| chr5:18487991-18490991   | 3000  | 0.66666667 |

|                        |      |            |
|------------------------|------|------------|
| chr5:21601846-21605846 | 4000 | 2.025      |
| chr5:22457846-22460846 | 3000 | 0.4        |
| chr5:22469846-22472846 | 3000 | 0.9        |
| chr5:24490846-24493846 | 3000 | 0.46666667 |
| chr5:24786846-24789846 | 3000 | 0.76666667 |
| chr5:25283846-25286846 | 3000 | 1.3        |
| chr5:25433846-25436846 | 3000 | 0.4        |
| chr5:28817846-28821846 | 4000 | 0.625      |
| chr5:29772846-29775846 | 3000 | 1.36666667 |
| chr5:30127846-30130846 | 3000 | 0.53333333 |
| chr5:30778172-30781172 | 3000 | 1.43333333 |
| chr5:31801172-31805172 | 4000 | 2.625      |
| chr5:33322172-33326172 | 4000 | 1.4        |
| chr5:35790172-35793172 | 3000 | 1.93333333 |
| chr5:36212172-36216172 | 4000 | 0.5        |
| chr5:37728172-37733172 | 5000 | 1.36       |
| chr5:40078172-40082172 | 4000 | 0.95       |
| chr5:41866545-41869545 | 3000 | 1.4        |
| chr5:42889545-42893545 | 4000 | 1.025      |
| chr5:44115545-44120545 | 5000 | 0.46       |
| chr5:46323545-46326545 | 3000 | 1.56666667 |
| chr5:49397545-49400545 | 3000 | 1.8        |
| chr5:49747545-49750545 | 3000 | 0.8        |
| chr5:50742545-50745545 | 3000 | 1.16666667 |
| chr5:51890545-51895545 | 5000 | 1.4        |
| chr5:51997545-52000545 | 3000 | 0.53333333 |
| chr5:55466545-55470545 | 4000 | 1.35       |
| chr5:55545545-55549545 | 4000 | 1.575      |
| chr5:57182545-57185545 | 3000 | 1.23333333 |
| chr5:58163545-58166545 | 3000 | 2          |
| chr5:62518261-62524261 | 6000 | 1.28333333 |
| chr5:63686261-63690261 | 4000 | 0.8        |
| chr5:63761261-63764261 | 3000 | 0.83333333 |
| chr5:65380261-65384261 | 4000 | 1.975      |
| chr5:65847261-65851261 | 4000 | 0.475      |
| chr5:71572261-71575261 | 3000 | 2.03333333 |
| chr5:73242261-73247261 | 5000 | 1.1        |
| chr5:73333261-73338261 | 5000 | 1.48       |
| chr5:76961458-76964458 | 3000 | 0.96666667 |
| chr5:77239458-77243458 | 4000 | 0.575      |
| chr5:78443458-78447458 | 4000 | 1.225      |
| chr5:78507458-78511458 | 4000 | 1.775      |
| chr5:78551458-78554458 | 3000 | 1.4        |
| chr5:78647458-78651458 | 4000 | 1.2        |
| chr5:78725458-78728458 | 3000 | 2.1        |
| chr5:78749458-78753458 | 4000 | 0.95       |
| chr5:78773458-78777458 | 4000 | 1.35       |
| chr5:78939458-78943458 | 4000 | 1.225      |
| chr5:79033458-79037458 | 4000 | 1.975      |
| chr5:79174458-79178458 | 4000 | 0.975      |
| chr5:79479060-79483060 | 4000 | 1.025      |
| chr5:79547825-79550825 | 3000 | 0.83333333 |
| chr5:81442817-81448817 | 6000 | 1.03333333 |



|                          |       |            |
|--------------------------|-------|------------|
| chr5:83269817-83273817   | 4000  | 0.55       |
| chr5:105582817-105585817 | 3000  | 0.66666667 |
| chr5:105655817-105659817 | 4000  | 1.6        |
| chr5:110003817-110007817 | 4000  | 0.525      |
| chr5:113394817-113397817 | 3000  | 0.9        |
| chr5:114908817-114911817 | 3000  | 0.7        |
| chr5:127571415-127575415 | 4000  | 0.775      |
| chr5:129273271-129276271 | 3000  | 1.43333333 |
| chr5:129951271-129954271 | 3000  | 0.33333333 |
| chr5:130901271-130907271 | 6000  | 1.11666667 |
| chr5:135522271-135527271 | 5000  | 1.38       |
| chr5:139394039-139397039 | 3000  | 0.93333333 |
| chr5:142006039-142009039 | 3000  | 1.03333333 |
| chr5:142112039-142117039 | 5000  | 1.2        |
| chr5:142133039-142136039 | 3000  | 0.53333333 |
| chr5:149144039-149147039 | 3000  | 0.8        |
| chr5:151031039-151038039 | 7000  | 0.98571429 |
| chr5:154780131-154783131 | 3000  | 1.26666667 |
| chr5:155278131-155283131 | 5000  | 0.9        |
| chr5:162249332-162255332 | 6000  | 1.25       |
| chr5:163771855-163774855 | 3000  | 0.53333333 |
| chr5:163811855-163817855 | 6000  | 1.45       |
| chr5:164168855-164172855 | 4000  | 0.725      |
| chr5:164652855-164655855 | 3000  | 1.5        |
| chr5:172737591-172740591 | 3000  | 0.86666667 |
| chr5:172860571-172865571 | 5000  | 0.86       |
| chr6:3005001-3008001     | 3000  | 1.06666667 |
| chr6:5401001-5405001     | 4000  | 1.65       |
| chr6:5482001-5485001     | 3000  | 0.6        |
| chr6:5939001-5942001     | 3000  | 1.33333333 |
| chr6:7862001-7865001     | 3000  | 0.86666667 |
| chr6:9427001-9431001     | 4000  | 0.425      |
| chr6:10351001-10354001   | 3000  | 0.6        |
| chr6:10683041-10687041   | 4000  | 1.85       |
| chr6:10706041-10716041   | 10000 | 1.01       |
| chr6:10927041-10931041   | 4000  | 0.675      |
| chr6:11125041-11128041   | 3000  | 1.03333333 |
| chr6:11301041-11304041   | 3000  | 0.5        |
| chr6:12887041-12890041   | 3000  | 0.5        |
| chr6:17644041-17647041   | 3000  | 1.86666667 |
| chr6:18110041-18113041   | 3000  | 0.36666667 |
| chr6:18214041-18217041   | 3000  | 0.13333333 |
| chr6:18512041-18516041   | 4000  | 1.875      |
| chr6:19168041-19171041   | 3000  | 0.43333333 |
| chr6:19214041-19217041   | 3000  | 0.66666667 |
| chr6:21326041-21332041   | 6000  | 1.26666667 |
| chr6:22262520-22268520   | 6000  | 1.61666667 |
| chr6:26602658-26605658   | 3000  | 0.7        |
| chr6:28221874-28224874   | 3000  | 0.76666667 |
| chr6:34398841-34401841   | 3000  | 0.83333333 |
| chr6:40776841-40781841   | 5000  | 1.14       |
| chr6:42478420-42484420   | 6000  | 0.96666667 |
| chr6:48950420-48954420   | 4000  | 1.05       |

|                          |      |            |
|--------------------------|------|------------|
| chr6:50396420-50399420   | 3000 | 0.63333333 |
| chr6:50523420-50529420   | 6000 | 1.15       |
| chr6:51885420-51889420   | 4000 | 1.725      |
| chr6:57178420-57182420   | 4000 | 1.2        |
| chr6:58957420-58961420   | 4000 | 0.425      |
| chr6:61555420-61558420   | 3000 | 0.7        |
| chr6:64070420-64073420   | 3000 | 0.93333333 |
| chr6:64518420-64522420   | 4000 | 0.4        |
| chr6:64819420-64824420   | 5000 | 0.36       |
| chr6:67713420-67716420   | 3000 | 0.86666667 |
| chr6:68135420-68139420   | 4000 | 1.35       |
| chr6:68578420-68584420   | 6000 | 1.61666667 |
| chr6:69030420-69035420   | 5000 | 1.52       |
| chr6:70791420-70797420   | 6000 | 1.25       |
| chr6:75017358-75020358   | 3000 | 1.26666667 |
| chr6:75546358-75549358   | 3000 | 1          |
| chr6:76487358-76492358   | 5000 | 1.48       |
| chr6:79410358-79414358   | 4000 | 0.675      |
| chr6:81767898-81770898   | 3000 | 0.36666667 |
| chr6:81812898-81815898   | 3000 | 2.26666667 |
| chr6:82005898-82008898   | 3000 | 0.4        |
| chr6:84691898-84694898   | 3000 | 0.63333333 |
| chr6:86533898-86538898   | 5000 | 1.12       |
| chr6:86543898-86547898   | 4000 | 1.85       |
| chr6:87337898-87341898   | 4000 | 1.825      |
| chr6:89369898-89373898   | 4000 | 0.275      |
| chr6:89603898-89606898   | 3000 | 0.63333333 |
| chr6:91626898-91630898   | 4000 | 1.025      |
| chr6:93897347-93900347   | 3000 | 1.93333333 |
| chr6:94443347-94447347   | 4000 | 1.325      |
| chr6:94785308-94788308   | 3000 | 1.06666667 |
| chr6:100780308-100787308 | 7000 | 1.71428571 |
| chr6:101129308-101132308 | 3000 | 0.23333333 |
| chr6:103494308-103499308 | 5000 | 1          |
| chr6:103531308-103535308 | 4000 | 0.875      |
| chr6:103581308-103584308 | 3000 | 0.46666667 |
| chr6:103604308-103607308 | 3000 | 0.6        |
| chr6:103638308-103641308 | 3000 | 0.66666667 |
| chr6:103676308-103679308 | 3000 | 0.63333333 |
| chr6:103903308-103907308 | 4000 | 0.65       |
| chr6:103964308-103969308 | 5000 | 0.56       |
| chr6:103972308-103976308 | 4000 | 0.55       |
| chr6:103978308-103981308 | 3000 | 0.66666667 |
| chr6:104013308-104018308 | 5000 | 0.8        |
| chr6:104165308-104168308 | 3000 | 0.53333333 |
| chr6:104172308-104175308 | 3000 | 0.63333333 |
| chr6:104190308-104193308 | 3000 | 0.93333333 |
| chr6:104214308-104217308 | 3000 | 1.06666667 |
| chr6:105666531-105671531 | 5000 | 1.14       |
| chr6:105749531-105753531 | 4000 | 0.6        |
| chr6:106274531-106278531 | 4000 | 0.925      |
| chr6:106497531-106503531 | 6000 | 1.86666667 |
| chr6:108126844-108130844 | 4000 | 1.325      |

|                          |      |            |
|--------------------------|------|------------|
| chr6:109098703-109102703 | 4000 | 1.275      |
| chr6:109654703-109657703 | 3000 | 1.33333333 |
| chr6:111910075-111913075 | 3000 | 1.03333333 |
| chr6:118638075-118643075 | 5000 | 1.5        |
| chr6:127721075-127724075 | 3000 | 0.46666667 |
| chr6:133040075-133046075 | 6000 | 1.11666667 |
| chr6:136260075-136263075 | 3000 | 1.43333333 |
| chr6:140332365-140335365 | 3000 | 0.6        |
| chr6:141706365-141710365 | 4000 | 0.8        |
| chr6:142317365-142320365 | 3000 | 0.26666667 |
| chr6:142457365-142461365 | 4000 | 1.6        |
| chr6:143729365-143734365 | 5000 | 1.24       |
| chr6:145001365-145007365 | 6000 | 0.81666667 |
| chr6:145104365-145108365 | 4000 | 0.9        |
| chr7:977001-980001       | 3000 | 1.03333333 |
| chr7:1104001-1108001     | 4000 | 1.075      |
| chr7:2600364-2603364     | 3000 | 1.66666667 |
| chr7:2825364-2829364     | 4000 | 0.425      |
| chr7:3243364-3247364     | 4000 | 0.55       |
| chr7:3781364-3785364     | 4000 | 1.6        |
| chr7:4391364-4394364     | 3000 | 0.5        |
| chr7:5239364-5242364     | 3000 | 0.63333333 |
| chr7:5505364-5508364     | 3000 | 2.8        |
| chr7:5777364-5780364     | 3000 | 0.53333333 |
| chr7:5866364-5869364     | 3000 | 0.3        |
| chr7:5987364-5992364     | 5000 | 1.74       |
| chr7:6223364-6228364     | 5000 | 1.68       |
| chr7:7055364-7059364     | 4000 | 1.125      |
| chr7:7154364-7158364     | 4000 | 1.525      |
| chr7:8027364-8031364     | 4000 | 0.35       |
| chr7:9298364-9302364     | 4000 | 0.525      |
| chr7:9318364-9321364     | 3000 | 0.73333333 |
| chr7:9401364-9404364     | 3000 | 0.4        |
| chr7:9481364-9485364     | 4000 | 0.65       |
| chr7:11710364-11714364   | 4000 | 1.25       |
| chr7:11942364-11945364   | 3000 | 1.73333333 |
| chr7:12256364-12260364   | 4000 | 0.475      |
| chr7:13213364-13217364   | 4000 | 1.325      |
| chr7:13224364-13228364   | 4000 | 1.925      |
| chr7:13262364-13265364   | 3000 | 1.4        |
| chr7:15037364-15040364   | 3000 | 1.33333333 |
| chr7:15051364-15055364   | 4000 | 1.575      |
| chr7:15578364-15581364   | 3000 | 0.76666667 |
| chr7:16569364-16572364   | 3000 | 1.36666667 |
| chr7:17011364-17015364   | 4000 | 1.5        |
| chr7:17267364-17270364   | 3000 | 1.73333333 |
| chr7:17566364-17569364   | 3000 | 0.23333333 |
| chr7:17881364-17884364   | 3000 | 1.8        |
| chr7:18031364-18034364   | 3000 | 0.6        |
| chr7:18910364-18913364   | 3000 | 2.36666667 |
| chr7:18995364-18999364   | 4000 | 1.6        |
| chr7:19094364-19098364   | 4000 | 1.475      |
| chr7:20446364-20451364   | 5000 | 1.24       |

|                          |      |            |
|--------------------------|------|------------|
| chr7:21714364-21719364   | 5000 | 1.98       |
| chr7:21770364-21773364   | 3000 | 0.6        |
| chr7:22386364-22390364   | 4000 | 3.5        |
| chr7:24103364-24106364   | 3000 | 2.5        |
| chr7:28753364-28756364   | 3000 | 0.8        |
| chr7:30701364-30704364   | 3000 | 0.73333333 |
| chr7:38054862-38057862   | 3000 | 1.6        |
| chr7:39719862-39722862   | 3000 | 0.5        |
| chr7:41480862-41486862   | 6000 | 1.15       |
| chr7:42642862-42645862   | 3000 | 1.2        |
| chr7:48547862-48550862   | 3000 | 1.96666667 |
| chr7:49662862-49665862   | 3000 | 1.73333333 |
| chr7:49882862-49885862   | 3000 | 0.56666667 |
| chr7:50022862-50028862   | 6000 | 1.31666667 |
| chr7:57395862-57398862   | 3000 | 1.83333333 |
| chr7:58637862-58641862   | 4000 | 0.725      |
| chr7:65666862-65670862   | 4000 | 0.45       |
| chr7:68075356-68078356   | 3000 | 1.36666667 |
| chr7:68112356-68115356   | 3000 | 0.43333333 |
| chr7:72897549-72903549   | 6000 | 0.41666667 |
| chr7:73241549-73245549   | 4000 | 1.05       |
| chr7:73646549-73649549   | 3000 | 1.13333333 |
| chr7:74278549-74282549   | 4000 | 1.125      |
| chr7:75063549-75069549   | 6000 | 1.6        |
| chr7:77287300-77290300   | 3000 | 0.66666667 |
| chr7:77531300-77536300   | 5000 | 0.72       |
| chr7:78667323-78670323   | 3000 | 1.43333333 |
| chr7:79787711-79792711   | 5000 | 1.18       |
| chr7:83253561-83256561   | 3000 | 1.53333333 |
| chr7:83799968-83802968   | 3000 | 0.43333333 |
| chr7:83967968-83970968   | 3000 | 1.9        |
| chr7:86119444-86122444   | 3000 | 1          |
| chr7:86328444-86331444   | 3000 | 0.6        |
| chr7:86692444-86695444   | 3000 | 0.8        |
| chr7:88205575-88211575   | 6000 | 1.45       |
| chr7:88255575-88259575   | 4000 | 1.025      |
| chr7:92596575-92599575   | 3000 | 1.3        |
| chr7:93824305-93828305   | 4000 | 1.625      |
| chr7:96015819-96019819   | 4000 | 2.475      |
| chr7:97478655-97483655   | 5000 | 1.68       |
| chr7:104901655-104904655 | 3000 | 0.26666667 |
| chr7:107450655-107454655 | 4000 | 0.375      |
| chr7:110170655-110173655 | 3000 | 0.16666667 |
| chr7:110700655-110704655 | 4000 | 1.775      |
| chr7:113283655-113287655 | 4000 | 1.325      |
| chr7:113302655-113305655 | 3000 | 0.8        |
| chr7:113415655-113419655 | 4000 | 1.6        |
| chr7:113454655-113458655 | 4000 | 1.1        |
| chr7:128822929-128826929 | 4000 | 0.85       |
| chr7:129155929-129158929 | 3000 | 0.96666667 |
| chr7:129776929-129779929 | 3000 | 1          |
| chr7:134993752-134996752 | 3000 | 1.1        |
| chr7:137168759-137171759 | 3000 | 0.5        |

|                          |      |            |
|--------------------------|------|------------|
| chr7:139209759-139212759 | 3000 | 0.7        |
| chr7:139579759-139583759 | 4000 | 1.75       |
| chr7:140342759-140345759 | 3000 | 0.63333333 |
| chr7:140378759-140382759 | 4000 | 0.725      |
| chr8:240252-244252       | 4000 | 0.675      |
| chr8:820252-824252       | 4000 | 1.625      |
| chr8:1662252-1665252     | 3000 | 0.16666667 |
| chr8:2999252-3002252     | 3000 | 0.26666667 |
| chr8:3360252-3365252     | 5000 | 1.26       |
| chr8:6263252-6267252     | 4000 | 0.9        |
| chr8:6425252-6428252     | 3000 | 0.8        |
| chr8:7826252-7830252     | 4000 | 0.7        |
| chr8:9090252-9095252     | 5000 | 1.48       |
| chr8:9811252-9814252     | 3000 | 0.86666667 |
| chr8:11205252-11208252   | 3000 | 1.06666667 |
| chr8:11644252-11647252   | 3000 | 0.76666667 |
| chr8:13705252-13710252   | 5000 | 0.4        |
| chr8:13988252-13991252   | 3000 | 0.43333333 |
| chr8:14319252-14323252   | 4000 | 3.35       |
| chr8:16335252-16339252   | 4000 | 1          |
| chr8:17829252-17834252   | 5000 | 1.16       |
| chr8:18603252-18606252   | 3000 | 0.53333333 |
| chr8:18772252-18777252   | 5000 | 1.16       |
| chr8:19162252-19165252   | 3000 | 1.8        |
| chr8:19313252-19316252   | 3000 | 2.06666667 |
| chr8:19370252-19374252   | 4000 | 1.25       |
| chr8:23514159-23517159   | 3000 | 0.36666667 |
| chr8:24005159-24008159   | 3000 | 1.4        |
| chr8:29186159-29190159   | 4000 | 1.175      |
| chr8:30214159-30217159   | 3000 | 2.03333333 |
| chr8:31795659-31799659   | 4000 | 0.925      |
| chr8:35751659-35754659   | 3000 | 1.3        |
| chr8:35893659-35898659   | 5000 | 1.54       |
| chr8:35937659-35943659   | 6000 | 1.18333333 |
| chr8:35977659-35980659   | 3000 | 3.23333333 |
| chr8:36087659-36090659   | 3000 | 1.36666667 |
| chr8:36707659-36710659   | 3000 | 0.43333333 |
| chr8:36731659-36735659   | 4000 | 0.575      |
| chr8:36805659-36809659   | 4000 | 1.625      |
| chr8:36920659-36923659   | 3000 | 0.43333333 |
| chr8:36944659-36948659   | 4000 | 0.825      |
| chr8:37002659-37006659   | 4000 | 1.575      |
| chr8:37108659-37112659   | 4000 | 0.525      |
| chr8:37261659-37264659   | 3000 | 0.46666667 |
| chr8:37944659-37947659   | 3000 | 0.76666667 |
| chr8:39600865-39604865   | 4000 | 1.825      |
| chr8:40908865-40912865   | 4000 | 0.425      |
| chr8:40933865-40936865   | 3000 | 0.33333333 |
| chr8:42877865-42880865   | 3000 | 1.06666667 |
| chr8:46987034-46990034   | 3000 | 0.9        |
| chr8:47627555-47631555   | 4000 | 0.75       |
| chr8:53613813-53616813   | 3000 | 0.5        |
| chr8:56187813-56192813   | 5000 | 1.5        |

|                          |      |            |
|--------------------------|------|------------|
| chr8:57596813-57599813   | 3000 | 0.26666667 |
| chr8:61097400-61101400   | 4000 | 0.45       |
| chr8:67157121-67161121   | 4000 | 0.825      |
| chr8:69012121-69015121   | 3000 | 1.53333333 |
| chr8:69595121-69598121   | 3000 | 0.33333333 |
| chr8:70319121-70322121   | 3000 | 1.16666667 |
| chr8:75666726-75669726   | 3000 | 0.46666667 |
| chr8:76906726-76909726   | 3000 | 1.06666667 |
| chr8:80729726-80733726   | 4000 | 0.825      |
| chr8:81601726-81604726   | 3000 | 0.4        |
| chr8:81622726-81625726   | 3000 | 0.5        |
| chr8:83232726-83237726   | 5000 | 0.88       |
| chr8:83262726-83267726   | 5000 | 0.86       |
| chr8:83277726-83281726   | 4000 | 0.9        |
| chr8:84355726-84358726   | 3000 | 0.53333333 |
| chr8:86501726-86505726   | 4000 | 1.525      |
| chr8:89001726-89004726   | 3000 | 0.6        |
| chr8:92756726-92759726   | 3000 | 0.6        |
| chr8:93924288-93928288   | 4000 | 2.125      |
| chr8:94362288-94365288   | 3000 | 2.13333333 |
| chr8:94410288-94414288   | 4000 | 1.4        |
| chr8:94908288-94911288   | 3000 | 0.6        |
| chr8:95404288-95408288   | 4000 | 1.05       |
| chr8:99601288-99606288   | 5000 | 1.62       |
| chr8:109129882-109132882 | 3000 | 1.1        |
| chr8:110258882-110262882 | 4000 | 1.4        |
| chr8:114363565-114366565 | 3000 | 0.33333333 |
| chr8:114844532-114849532 | 5000 | 0.98       |
| chr8:116126123-116129123 | 3000 | 1.33333333 |
| chr8:119820123-119823123 | 3000 | 0.56666667 |
| chr8:124203123-124207123 | 4000 | 1.075      |
| chr8:124765123-124768123 | 3000 | 1.56666667 |
| chr8:126551576-126554576 | 3000 | 0.7        |
| chr9:398001-401001       | 3000 | 0.96666667 |
| chr9:1053001-1057001     | 4000 | 2.175      |
| chr9:1551001-1555001     | 4000 | 1.275      |
| chr9:3675001-3678001     | 3000 | 0.86666667 |
| chr9:4747001-4751001     | 4000 | 1.575      |
| chr9:7224001-7228001     | 4000 | 0.95       |
| chr9:10170001-10173001   | 3000 | 1.06666667 |
| chr9:10178001-10182001   | 4000 | 0.95       |
| chr9:10183001-10186001   | 3000 | 1.8        |
| chr9:13553948-13556948   | 3000 | 0.7        |
| chr9:16724948-16727948   | 3000 | 0.53333333 |
| chr9:25886948-25890948   | 4000 | 1.675      |
| chr9:27391948-27394948   | 3000 | 0.46666667 |
| chr9:27553948-27556948   | 3000 | 1.2        |
| chr9:29562948-29565948   | 3000 | 1.2        |
| chr9:33147948-33153948   | 6000 | 1.16666667 |
| chr9:36794948-36799948   | 5000 | 2.06       |
| chr9:39973948-39976948   | 3000 | 0.43333333 |
| chr9:41586948-41593948   | 7000 | 1.5        |
| chr9:43317948-43320948   | 3000 | 0.5        |

|                          |      |            |
|--------------------------|------|------------|
| chr9:44855948-44858948   | 3000 | 0.56666667 |
| chr9:45192948-45195948   | 3000 | 1.83333333 |
| chr9:46069948-46072948   | 3000 | 0.3        |
| chr9:49947948-49950948   | 3000 | 0.23333333 |
| chr9:52096948-52100948   | 4000 | 1.075      |
| chr9:54640043-54643043   | 3000 | 1.4        |
| chr9:54796043-54799043   | 3000 | 1.8        |
| chr9:54925043-54928043   | 3000 | 0.36666667 |
| chr9:59200879-59203879   | 3000 | 0.83333333 |
| chr9:70592879-70596879   | 4000 | 1.275      |
| chr9:70887879-70890879   | 3000 | 0.66666667 |
| chr9:71393879-71396879   | 3000 | 0.96666667 |
| chr9:73986178-73990178   | 4000 | 0.6        |
| chr9:74844290-74847290   | 3000 | 1.5        |
| chr9:75032290-75035290   | 3000 | 1.36666667 |
| chr9:76383290-76387290   | 4000 | 0.925      |
| chr9:77376290-77380290   | 4000 | 1.5        |
| chr9:80812290-80816290   | 4000 | 1.675      |
| chr9:80840290-80843290   | 3000 | 1.8        |
| chr9:90373290-90377290   | 4000 | 0.6        |
| chr9:91713290-91716290   | 3000 | 0.46666667 |
| chr9:93525290-93528290   | 3000 | 0.66666667 |
| chr9:96702290-96705290   | 3000 | 0.56666667 |
| chr9:100621290-100625290 | 4000 | 0.55       |
| chr9:102581290-102585290 | 4000 | 1.7        |
| chr9:104276290-104281290 | 5000 | 1.82       |
| chr9:104815290-104818290 | 3000 | 0.4        |
| chr9:109118290-109122290 | 4000 | 0.625      |
| chr9:109917290-109920290 | 3000 | 1.96666667 |
| chr9:111595290-111601290 | 6000 | 0.36666667 |
| chr9:111604290-111608290 | 4000 | 0.4        |
| chr10:150001-154001      | 4000 | 0.3        |
| chr10:521001-524001      | 3000 | 0.8        |
| chr10:1664802-1667802    | 3000 | 0.63333333 |
| chr10:1960219-1964219    | 4000 | 1.65       |
| chr10:4331219-4334219    | 3000 | 1.7        |
| chr10:6273219-6277219    | 4000 | 0.9        |
| chr10:6570219-6573219    | 3000 | 1.66666667 |
| chr10:6576219-6580219    | 4000 | 1.025      |
| chr10:8029219-8034219    | 5000 | 1.78       |
| chr10:10429422-10433422  | 4000 | 1.35       |
| chr10:10791422-10794422  | 3000 | 0.56666667 |
| chr10:11866422-11870422  | 4000 | 1.325      |
| chr10:11973422-11977422  | 4000 | 1.25       |
| chr10:12216422-12220422  | 4000 | 1.825      |
| chr10:12303422-12308422  | 5000 | 0.5        |
| chr10:12524422-12529422  | 5000 | 0.36       |
| chr10:16996364-17003364  | 7000 | 1.08571429 |
| chr10:23967714-23970714  | 3000 | 0.43333333 |
| chr10:28732714-28735714  | 3000 | 1.16666667 |
| chr10:29575714-29580714  | 5000 | 1.66       |
| chr10:36766420-36769420  | 3000 | 0.66666667 |
| chr10:39367720-39372720  | 5000 | 0.5        |

|                           |       |            |
|---------------------------|-------|------------|
| chr10:44564550-44567550   | 3000  | 1          |
| chr10:44573550-44577550   | 4000  | 1.35       |
| chr10:44778550-44781550   | 3000  | 1.4        |
| chr10:55995850-56000850   | 5000  | 1.98       |
| chr10:56002850-56005850   | 3000  | 1.43333333 |
| chr10:60876885-60879885   | 3000  | 0.23333333 |
| chr10:69418127-69421127   | 3000  | 1.56666667 |
| chr10:69490127-69493127   | 3000  | 0.46666667 |
| chr10:72313127-72316127   | 3000  | 1.16666667 |
| chr10:76143202-76146202   | 3000  | 1.26666667 |
| chr10:80518106-80524106   | 6000  | 1.46666667 |
| chr10:82946106-82949106   | 3000  | 0.73333333 |
| chr10:86614611-86617611   | 3000  | 0.5        |
| chr10:87807611-87810611   | 3000  | 0.83333333 |
| chr10:88840611-88844611   | 4000  | 0.45       |
| chr10:90834611-90837611   | 3000  | 1.66666667 |
| chr10:94328097-94333097   | 5000  | 0.74       |
| chr10:98389097-98392097   | 3000  | 1.13333333 |
| chr10:104767643-104770643 | 3000  | 0.66666667 |
| chr10:104819643-104825643 | 6000  | 1.3        |
| chr10:105117643-105121643 | 4000  | 3.025      |
| chr10:109438636-109441636 | 3000  | 1.66666667 |
| chr10:110338636-110341636 | 3000  | 0.93333333 |
| chr11:335001-338001       | 3000  | 1.53333333 |
| chr11:636001-640001       | 4000  | 1.2        |
| chr11:2040001-2046001     | 6000  | 1.48333333 |
| chr11:2207001-2212001     | 5000  | 1.7        |
| chr11:8179456-8182456     | 3000  | 0.5        |
| chr11:9336456-9340456     | 4000  | 3.25       |
| chr11:11854456-11857456   | 3000  | 0.9        |
| chr11:12320456-12324456   | 4000  | 1.325      |
| chr11:12428456-12432456   | 4000  | 1.625      |
| chr11:14517456-14520456   | 3000  | 0.7        |
| chr11:16031456-16034456   | 3000  | 0.56666667 |
| chr11:17682625-17685625   | 3000  | 0.56666667 |
| chr11:18386625-18389625   | 3000  | 0.4        |
| chr11:20762191-20766191   | 4000  | 1.9        |
| chr11:22688191-22691191   | 3000  | 0.46666667 |
| chr11:22851191-22855191   | 4000  | 2.1        |
| chr11:23156191-23160191   | 4000  | 1.525      |
| chr11:23771191-23774191   | 3000  | 1.23333333 |
| chr11:23900191-23911191   | 11000 | 1.59090909 |
| chr11:31923191-31927191   | 4000  | 1.25       |
| chr11:37376191-37379191   | 3000  | 0.9        |
| chr11:37848191-37852191   | 4000  | 0.825      |
| chr11:38008191-38012191   | 4000  | 1.15       |
| chr11:38774191-38777191   | 3000  | 0.56666667 |
| chr11:38912191-38916191   | 4000  | 0.8        |
| chr11:44426191-44430191   | 4000  | 2.15       |
| chr11:45295191-45298191   | 3000  | 1.23333333 |
| chr11:48439191-48442191   | 3000  | 0.73333333 |
| chr11:50707191-50710191   | 3000  | 0.3        |
| chr11:50916191-50919191   | 3000  | 0.5        |



|                         |      |            |
|-------------------------|------|------------|
| chr11:57642800-57645800 | 3000 | 0.96666667 |
| chr11:63606306-63611306 | 5000 | 1.26       |
| chr11:64110306-64115306 | 5000 | 1.26       |
| chr11:64808306-64811306 | 3000 | 0.96666667 |
| chr11:65955306-65959306 | 4000 | 0.525      |
| chr11:66393306-66397306 | 4000 | 1.15       |
| chr11:66446306-66449306 | 3000 | 0.66666667 |
| chr11:66770306-66773306 | 3000 | 1.53333333 |
| chr11:67552306-67555306 | 3000 | 0.7        |
| chr11:70013306-70016306 | 3000 | 1.06666667 |
| chr11:72522306-72525306 | 3000 | 1.86666667 |
| chr11:77664495-77667495 | 3000 | 0.9        |
| chr11:79326495-79329495 | 3000 | 0.43333333 |
| chr11:79976495-79979495 | 3000 | 1.1        |
| chr11:80164495-80168495 | 4000 | 1.95       |
| chr11:80992495-80996495 | 4000 | 1.875      |
| chr11:80997495-81000495 | 3000 | 1.56666667 |
| chr11:81516495-81523495 | 7000 | 1.52857143 |
| chr11:81611495-81615495 | 4000 | 1.025      |
| chr11:82190495-82193495 | 3000 | 1.76666667 |
| chr11:82344495-82349495 | 5000 | 1.28       |
| chr11:82871228-82877228 | 6000 | 1.11666667 |
| chr11:83299228-83302228 | 3000 | 0.66666667 |
| chr11:83610228-83613228 | 3000 | 2.43333333 |
| chr11:84025458-84029458 | 4000 | 1.3        |
| chr11:86211794-86215794 | 4000 | 0.8        |
| chr12:15732837-15735837 | 3000 | 1          |
| chr12:18091864-18095864 | 4000 | 2.6        |
| chr12:18590864-18594864 | 4000 | 1.35       |
| chr12:18750864-18753864 | 3000 | 1.53333333 |
| chr12:18880864-18888864 | 8000 | 1.5875     |
| chr12:19004864-19007864 | 3000 | 1.36666667 |
| chr12:19212864-19217864 | 5000 | 1.42       |
| chr12:19473864-19476864 | 3000 | 1.4        |
| chr12:19932329-19936329 | 4000 | 1.825      |
| chr12:20111329-20114329 | 3000 | 1.13333333 |
| chr12:20380329-20383329 | 3000 | 1.4        |
| chr12:20490329-20493329 | 3000 | 1.23333333 |
| chr12:20501329-20505329 | 4000 | 1.175      |
| chr12:20581329-20585329 | 4000 | 2.025      |
| chr12:20592329-20595329 | 3000 | 0.3        |
| chr12:22498303-22501303 | 3000 | 0.66666667 |
| chr12:22515303-22518303 | 3000 | 1.03333333 |
| chr12:22520303-22523303 | 3000 | 0.73333333 |
| chr12:32342483-32345483 | 3000 | 2          |
| chr12:34984929-34987929 | 3000 | 0.6        |
| chr12:35512929-35516929 | 4000 | 0.85       |
| chr12:46148806-46152806 | 4000 | 1.2        |
| chr12:46170806-46175806 | 5000 | 0.92       |
| chr13:933001-936001     | 3000 | 1.43333333 |
| chr13:1345001-1348001   | 3000 | 1.46666667 |
| chr13:1596001-1600001   | 4000 | 0.375      |
| chr13:1687001-1690001   | 3000 | 0.3        |

|                         |      |            |
|-------------------------|------|------------|
| chr13:2649001-2652001   | 3000 | 1.36666667 |
| chr13:2667001-2671001   | 4000 | 1.9        |
| chr13:3384001-3387001   | 3000 | 2.53333333 |
| chr13:3497001-3500001   | 3000 | 0.56666667 |
| chr13:4393001-4397001   | 4000 | 1.2        |
| chr13:4913001-4916001   | 3000 | 0.63333333 |
| chr13:5651001-5654001   | 3000 | 0.26666667 |
| chr13:5928001-5931001   | 3000 | 0.3        |
| chr13:6332001-6335001   | 3000 | 1.4        |
| chr13:6368001-6371001   | 3000 | 0.13333333 |
| chr13:6742001-6746001   | 4000 | 1.125      |
| chr13:6822001-6827001   | 5000 | 0.72       |
| chr13:7498001-7504001   | 6000 | 1.4        |
| chr13:7512001-7515001   | 3000 | 0.33333333 |
| chr13:8574001-8577001   | 3000 | 1.46666667 |
| chr13:8717001-8721001   | 4000 | 1.725      |
| chr13:9043001-9047001   | 4000 | 1.975      |
| chr13:9049001-9052001   | 3000 | 0.4        |
| chr13:9104001-9108001   | 4000 | 2.75       |
| chr13:9213001-9216001   | 3000 | 1.2        |
| chr13:9752001-9755001   | 3000 | 0.7        |
| chr13:10157001-10160001 | 3000 | 1.53333333 |
| chr13:11287001-11290001 | 3000 | 0.76666667 |
| chr13:11537001-11540001 | 3000 | 0.5        |
| chr13:12288001-12291001 | 3000 | 0.86666667 |
| chr13:13071001-13075001 | 4000 | 1.675      |
| chr13:13169001-13173001 | 4000 | 1.225      |
| chr13:14590001-14593001 | 3000 | 0.26666667 |
| chr13:15838001-15843001 | 5000 | 0.56       |
| chr13:16235001-16240001 | 5000 | 1.1        |
| chr13:16243001-16246001 | 3000 | 1.2        |
| chr13:17368001-17373001 | 5000 | 2.52       |
| chr13:17619001-17623001 | 4000 | 1          |
| chr13:17638001-17641001 | 3000 | 1.26666667 |
| chr13:18320001-18324001 | 4000 | 2.075      |
| chr13:19357001-19360001 | 3000 | 1.46666667 |
| chr13:19553001-19557001 | 4000 | 0.325      |
| chr13:20248001-20251001 | 3000 | 0.63333333 |
| chr13:20304001-20309001 | 5000 | 1.14       |
| chr13:20546001-20549001 | 3000 | 0.96666667 |
| chr13:20884001-20888001 | 4000 | 1.275      |
| chr13:21389001-21392001 | 3000 | 0.9        |
| chr13:21517001-21522001 | 5000 | 2.04       |
| chr13:21990001-21995001 | 5000 | 1.34       |
| chr13:22014001-22017001 | 3000 | 0.73333333 |
| chr13:22677001-22683001 | 6000 | 1.8        |
| chr13:23182001-23185001 | 3000 | 0.33333333 |
| chr13:23675001-23681001 | 6000 | 0.85       |
| chr13:23889001-23892001 | 3000 | 1.06666667 |
| chr13:24780001-24786001 | 6000 | 1.13333333 |
| chr13:25348001-25352001 | 4000 | 0.375      |
| chr13:25695001-25698001 | 3000 | 1.1        |
| chr13:25727001-25730001 | 3000 | 0.43333333 |

|                           |      |            |
|---------------------------|------|------------|
| chr13:26225001-26230001   | 5000 | 1.54       |
| chr13:26234001-26237001   | 3000 | 1.2        |
| chr13:26330001-26336001   | 6000 | 1.43333333 |
| chr13:26516001-26520001   | 4000 | 0.725      |
| chr13:27104001-27108001   | 4000 | 2.8        |
| chr13:27536001-27540001   | 4000 | 2.075      |
| chr13:27543001-27547001   | 4000 | 1.3        |
| chr13:28291001-28295001   | 4000 | 0.9        |
| chr13:28401001-28404001   | 3000 | 1.3        |
| chr13:28448001-28452001   | 4000 | 1.325      |
| chr13:30015001-30019001   | 4000 | 1.575      |
| chr13:30270001-30274001   | 4000 | 0.725      |
| chr13:34535001-34538001   | 3000 | 1.46666667 |
| chr13:34807001-34810001   | 3000 | 0.7        |
| chr13:35166001-35169001   | 3000 | 0.26666667 |
| chr13:40988001-40991001   | 3000 | 1.76666667 |
| chr13:43199001-43203001   | 4000 | 1.7        |
| chr13:44716796-44719796   | 3000 | 0.83333333 |
| chr13:53951711-53955711   | 4000 | 1.225      |
| chr13:56725711-56729711   | 4000 | 1.325      |
| chr13:58602711-58605711   | 3000 | 0.26666667 |
| chr13:59148711-59152711   | 4000 | 0.25       |
| chr13:59373711-59376711   | 3000 | 0.46666667 |
| chr13:62525711-62529711   | 4000 | 1.95       |
| chr13:63336711-63339711   | 3000 | 2.33333333 |
| chr13:63557711-63561711   | 4000 | 1.825      |
| chr13:65335711-65338711   | 3000 | 1.76666667 |
| chr13:66406711-66409711   | 3000 | 1.13333333 |
| chr13:69348506-69351506   | 3000 | 1.6        |
| chr13:72445978-72448978   | 3000 | 0.43333333 |
| chr13:74948978-74952978   | 4000 | 1.8        |
| chr13:76866978-76872978   | 6000 | 1.33333333 |
| chr13:78286978-78290978   | 4000 | 0.925      |
| chr13:80817978-80820978   | 3000 | 0.63333333 |
| chr13:81479978-81483978   | 4000 | 0.65       |
| chr13:87877175-87880175   | 3000 | 0.7        |
| chr13:89364175-89368175   | 4000 | 1.025      |
| chr13:93714444-93720444   | 6000 | 0.7        |
| chr13:98203444-98207444   | 4000 | 0.9        |
| chr13:98216444-98219444   | 3000 | 0.96666667 |
| chr13:98799444-98803444   | 4000 | 1.1        |
| chr13:100849291-100852291 | 3000 | 0.53333333 |
| chr13:104663291-104666291 | 3000 | 0.63333333 |
| chr13:107744850-107747850 | 3000 | 0.2        |
| chr14:201001-205001       | 4000 | 0.75       |
| chr14:517001-520001       | 3000 | 1.56666667 |
| chr14:1502171-1505171     | 3000 | 1.06666667 |
| chr14:4838512-4843512     | 5000 | 1.92       |
| chr14:5739512-5742512     | 3000 | 1.56666667 |
| chr14:5762512-5766512     | 4000 | 1.65       |
| chr14:5819512-5824512     | 5000 | 1.3        |
| chr14:5894512-5900512     | 6000 | 1.66666667 |
| chr14:6410512-6416512     | 6000 | 1.75       |

|                           |      |            |
|---------------------------|------|------------|
| chr14:11718844-11721844   | 3000 | 2.33333333 |
| chr14:15248844-15251844   | 3000 | 0.4        |
| chr14:17096844-17102844   | 6000 | 1.03333333 |
| chr14:21412844-21415844   | 3000 | 1.23333333 |
| chr14:22082844-22086844   | 4000 | 2.025      |
| chr14:22093844-22096844   | 3000 | 0.9        |
| chr14:22111844-22115844   | 4000 | 1.825      |
| chr14:22268844-22273844   | 5000 | 1.56       |
| chr14:22666844-22670844   | 4000 | 2.5        |
| chr14:25994844-25997844   | 3000 | 0.76666667 |
| chr14:30029844-30032844   | 3000 | 1.63333333 |
| chr14:34297844-34301844   | 4000 | 1.05       |
| chr14:37045617-37048617   | 3000 | 1.13333333 |
| chr14:37268617-37273617   | 5000 | 1.44       |
| chr14:44631901-44635901   | 4000 | 1.525      |
| chr14:44661901-44664901   | 3000 | 1.8        |
| chr14:47832901-47835901   | 3000 | 0.7        |
| chr14:48489901-48492901   | 3000 | 1.43333333 |
| chr14:48522901-48525901   | 3000 | 1.5        |
| chr14:48582901-48585901   | 3000 | 1.4        |
| chr14:48645901-48648901   | 3000 | 1.66666667 |
| chr14:49153901-49156901   | 3000 | 1.56666667 |
| chr14:49209901-49212901   | 3000 | 1.66666667 |
| chr14:49528901-49532901   | 4000 | 2.1        |
| chr14:49569901-49573901   | 4000 | 1.15       |
| chr14:49683901-49687901   | 4000 | 1.925      |
| chr14:51559901-51564901   | 5000 | 1.4        |
| chr14:51787901-51790901   | 3000 | 1.06666667 |
| chr14:52175901-52178901   | 3000 | 0.96666667 |
| chr14:52468901-52471901   | 3000 | 1.03333333 |
| chr14:56106901-56110901   | 4000 | 1.35       |
| chr14:57976901-57979901   | 3000 | 2.3        |
| chr14:65730901-65733901   | 3000 | 0.56666667 |
| chr14:66221901-66225901   | 4000 | 1.375      |
| chr14:72602985-72605985   | 3000 | 0.86666667 |
| chr14:77398985-77401985   | 3000 | 0.66666667 |
| chr14:81965836-81968836   | 3000 | 0.7        |
| chr14:82280836-82283836   | 3000 | 0.6        |
| chr14:82505836-82510836   | 5000 | 0.82       |
| chr14:86209958-86213958   | 4000 | 0.85       |
| chr14:87581747-87587747   | 6000 | 1.38333333 |
| chr14:87632747-87635747   | 3000 | 0.7        |
| chr14:90732747-90736747   | 4000 | 0.6        |
| chr14:90892747-90896747   | 4000 | 0.6        |
| chr14:94975747-94978747   | 3000 | 0.83333333 |
| chr14:98309632-98313632   | 4000 | 1.35       |
| chr14:98348632-98351632   | 3000 | 0.66666667 |
| chr14:98773632-98776632   | 3000 | 1.16666667 |
| chr14:99047632-99050632   | 3000 | 0.9        |
| chr14:99637632-99640632   | 3000 | 0.46666667 |
| chr14:100540632-100543632 | 3000 | 0.13333333 |
| chr14:100564632-100567632 | 3000 | 1.2        |
| chr14:100600632-100603632 | 3000 | 1.16666667 |

|                           |       |            |
|---------------------------|-------|------------|
| chr14:101072632-101075632 | 3000  | 0.36666667 |
| chr14:102015271-102019271 | 4000  | 1.45       |
| chr14:103026271-103029271 | 3000  | 1.03333333 |
| chr14:108290879-108294879 | 4000  | 0.825      |
| chr14:109476879-109479879 | 3000  | 0.53333333 |
| chr15:4139911-4142911     | 3000  | 1.26666667 |
| chr15:5573911-5577911     | 4000  | 1.525      |
| chr15:5666911-5679663     | 12752 | 1.29391468 |
| chr15:6359663-6362663     | 3000  | 1.33333333 |
| chr15:6424663-6429663     | 5000  | 1.16       |
| chr15:7475663-7479663     | 4000  | 0.8        |
| chr15:7755663-7759663     | 4000  | 0.45       |
| chr15:8523663-8529663     | 6000  | 0.58333333 |
| chr15:9831663-9836663     | 5000  | 1.14       |
| chr15:11634663-11638663   | 4000  | 0.375      |
| chr15:12836663-12839663   | 3000  | 0.93333333 |
| chr15:14106663-14111663   | 5000  | 1.72       |
| chr15:15345760-15350760   | 5000  | 0.68       |
| chr15:15783760-15786760   | 3000  | 0.46666667 |
| chr15:18626760-18629760   | 3000  | 0.86666667 |
| chr15:23265471-23270471   | 5000  | 1.28       |
| chr15:25585471-25588471   | 3000  | 0.86666667 |
| chr15:27170471-27176471   | 6000  | 1.21666667 |
| chr15:27215471-27221471   | 6000  | 1.58333333 |
| chr15:28213794-28216794   | 3000  | 0.9        |
| chr15:29760794-29766794   | 6000  | 1.21666667 |
| chr15:30303794-30308794   | 5000  | 1.04       |
| chr15:32340794-32343794   | 3000  | 0.36666667 |
| chr15:33588794-33593794   | 5000  | 1.1        |
| chr15:34263794-34268794   | 5000  | 1.36       |
| chr15:34779794-34784794   | 5000  | 1.84       |
| chr15:34788794-34791794   | 3000  | 0.7        |
| chr15:35840466-35843466   | 3000  | 2.03333333 |
| chr15:38697466-38703466   | 6000  | 0.75       |
| chr15:40354466-40357466   | 3000  | 2.23333333 |
| chr15:42360466-42365466   | 5000  | 1.34       |
| chr15:46143972-46146972   | 3000  | 0.63333333 |
| chr15:46746786-46750786   | 4000  | 1.35       |
| chr15:47573786-47579786   | 6000  | 1.21666667 |
| chr15:47676786-47683786   | 7000  | 1.4        |
| chr15:47989786-47992786   | 3000  | 1.26666667 |
| chr15:48721786-48725786   | 4000  | 1.975      |
| chr15:49227786-49230786   | 3000  | 1.33333333 |
| chr15:49517786-49520786   | 3000  | 0.53333333 |
| chr15:50116786-50120786   | 4000  | 2.05       |
| chr15:50797107-50803107   | 6000  | 1.1        |
| chr15:53111107-53117107   | 6000  | 1.75       |
| chr15:54964107-54969107   | 5000  | 1.36       |
| chr15:55188107-55192107   | 4000  | 0.5        |
| chr15:55238107-55241107   | 3000  | 0.16666667 |
| chr15:61043478-61047478   | 4000  | 1.35       |
| chr15:62116478-62119478   | 3000  | 0.53333333 |
| chr15:63643478-63646478   | 3000  | 1.33333333 |

|                           |      |            |
|---------------------------|------|------------|
| chr15:64292478-64298478   | 6000 | 1.15       |
| chr15:64867478-64870478   | 3000 | 0.6        |
| chr15:65684478-65688478   | 4000 | 0.65       |
| chr15:66108478-66112478   | 4000 | 1.925      |
| chr15:69194478-69197478   | 3000 | 0.7        |
| chr15:71436478-71442478   | 6000 | 1.15       |
| chr15:74041478-74046478   | 5000 | 1.54       |
| chr15:74629478-74632478   | 3000 | 1.63333333 |
| chr15:77203478-77206478   | 3000 | 0.5        |
| chr15:79841478-79844478   | 3000 | 0.53333333 |
| chr15:86653478-86656478   | 3000 | 0.6        |
| chr15:90531478-90535478   | 4000 | 2.175      |
| chr15:91016478-91019478   | 3000 | 0.76666667 |
| chr15:91983478-91989478   | 6000 | 1.65       |
| chr15:93450478-93453478   | 3000 | 0.6        |
| chr15:99088478-99091478   | 3000 | 1.4        |
| chr15:102838478-102843478 | 5000 | 0.94       |
| chr15:105160238-105165238 | 5000 | 2.06       |
| chr15:106946093-106952093 | 6000 | 1.6        |
| chr15:107080093-107084093 | 4000 | 1.025      |
| chr16:1554001-1558001     | 4000 | 1.525      |
| chr16:2796001-2800001     | 4000 | 1.625      |
| chr16:2817001-2823001     | 6000 | 1.4        |
| chr16:3069001-3074001     | 5000 | 1.68       |
| chr16:7042607-7046607     | 4000 | 1.875      |
| chr16:7503607-7508607     | 5000 | 1          |
| chr16:7558607-7561607     | 3000 | 1.3        |
| chr16:7578607-7582607     | 4000 | 1.525      |
| chr16:8958607-8961607     | 3000 | 1.23333333 |
| chr16:13344607-13348607   | 4000 | 1.025      |
| chr16:14030644-14033644   | 3000 | 0.63333333 |
| chr16:14076644-14081644   | 5000 | 1.9        |
| chr16:16368644-16371644   | 3000 | 0.26666667 |
| chr16:17738644-17742644   | 4000 | 0.425      |
| chr16:18602644-18608644   | 6000 | 0.91666667 |
| chr16:20688199-20692199   | 4000 | 0.975      |
| chr16:24112199-24115199   | 3000 | 2.63333333 |
| chr16:25137199-25142199   | 5000 | 1.74       |
| chr16:25855199-25861199   | 6000 | 1.25       |
| chr16:27448199-27451199   | 3000 | 1.83333333 |
| chr16:28727199-28731199   | 4000 | 1.075      |
| chr16:29371199-29374199   | 3000 | 1.4        |
| chr16:29411199-29415199   | 4000 | 0.425      |
| chr16:30723950-30726950   | 3000 | 0.4        |
| chr16:31113950-31117950   | 4000 | 1.575      |
| chr16:31398950-31402950   | 4000 | 1.5        |
| chr16:31725950-31729950   | 4000 | 0.55       |
| chr16:35744950-35748950   | 4000 | 1.425      |
| chr16:40251950-40257950   | 6000 | 1.53333333 |
| chr16:47285950-47289950   | 4000 | 3.325      |
| chr16:50236950-50242950   | 6000 | 1.68333333 |
| chr16:54228399-54231399   | 3000 | 0.6        |
| chr16:56744203-56747203   | 3000 | 1.06666667 |

|                         |      |            |
|-------------------------|------|------------|
| chr16:60971203-60975203 | 4000 | 1.65       |
| chr16:61722203-61725203 | 3000 | 1.46666667 |
| chr16:61982203-61986203 | 4000 | 1.625      |
| chr16:62445203-62448203 | 3000 | 0.83333333 |
| chr16:66903604-66908604 | 5000 | 0.48       |
| chr16:70257732-70260732 | 3000 | 2.43333333 |
| chr16:70262732-70265732 | 3000 | 2.06666667 |
| chr16:71882732-71886732 | 4000 | 1.075      |
| chr16:72823732-72826732 | 3000 | 1.06666667 |
| chr16:75621732-75626732 | 5000 | 1.18       |
| chr16:77317732-77320732 | 3000 | 0.5        |
| chr16:82398158-82403158 | 5000 | 1.34       |
| chr16:89232712-89236712 | 4000 | 0.425      |
| chr17:2208950-2212950   | 4000 | 2.025      |
| chr17:2439950-2442950   | 3000 | 0.9        |
| chr17:4010950-4014950   | 4000 | 1.2        |
| chr17:7577950-7582950   | 5000 | 1.48       |
| chr17:10613950-10616950 | 3000 | 0.63333333 |
| chr17:10894950-10897950 | 3000 | 1.13333333 |
| chr17:11834950-11837950 | 3000 | 1.13333333 |
| chr17:14004950-14009950 | 5000 | 1.94       |
| chr17:15889617-15893617 | 4000 | 2.025      |
| chr17:17265777-17271777 | 6000 | 1.26666667 |
| chr17:17272777-17278777 | 6000 | 1.68333333 |
| chr17:17565777-17568777 | 3000 | 0.76666667 |
| chr17:17688777-17695777 | 7000 | 1.22857143 |
| chr17:19053777-19058777 | 5000 | 1.24       |
| chr17:19437641-19443641 | 6000 | 1.18333333 |
| chr17:19445641-19448641 | 3000 | 0.43333333 |
| chr17:19829641-19832641 | 3000 | 1.13333333 |
| chr17:20592641-20595641 | 3000 | 1.83333333 |
| chr17:20713641-20717641 | 4000 | 1.85       |
| chr17:22159641-22164641 | 5000 | 1.4        |
| chr17:22650861-22653861 | 3000 | 1.73333333 |
| chr17:24498861-24501861 | 3000 | 0.63333333 |
| chr17:26058861-26061861 | 3000 | 1          |
| chr17:31957775-31961775 | 4000 | 2          |
| chr17:35753775-35756775 | 3000 | 1.76666667 |
| chr17:36268775-36272775 | 4000 | 1.275      |
| chr17:36408775-36413775 | 5000 | 1.02       |
| chr17:37350176-37353176 | 3000 | 1.2        |
| chr17:37515176-37519176 | 4000 | 1.625      |
| chr17:37698176-37703176 | 5000 | 1.32       |
| chr17:37907176-37910176 | 3000 | 1.33333333 |
| chr17:37914176-37917176 | 3000 | 1.13333333 |
| chr17:39625176-39629176 | 4000 | 0.775      |
| chr17:40744176-40748176 | 4000 | 1.95       |
| chr17:43010176-43014176 | 4000 | 1.6        |
| chr17:50097176-50100176 | 3000 | 0.83333333 |
| chr17:50198176-50201176 | 3000 | 1.7        |
| chr17:50245176-50249176 | 4000 | 1.05       |
| chr17:50634473-50637473 | 3000 | 2.56666667 |
| chr17:53392473-53395473 | 3000 | 1.93333333 |

|                         |      |            |
|-------------------------|------|------------|
| chr17:53581473-53586473 | 5000 | 1.6        |
| chr17:53630473-53633473 | 3000 | 1.7        |
| chr17:54745473-54749473 | 4000 | 0.975      |
| chr17:54855473-54858473 | 3000 | 0.86666667 |
| chr17:58569473-58573473 | 4000 | 1.45       |
| chr17:61055079-61058079 | 3000 | 0.83333333 |
| chr17:61116079-61119079 | 3000 | 0.3        |
| chr17:61314079-61317079 | 3000 | 1.3        |
| chr17:61811079-61814079 | 3000 | 0.73333333 |
| chr17:62844079-62847079 | 3000 | 0.8        |
| chr17:62959079-62962079 | 3000 | 0.4        |
| chr17:63023079-63026079 | 3000 | 1.23333333 |
| chr17:64604079-64607079 | 3000 | 1.53333333 |
| chr17:65983079-65986079 | 3000 | 0.76666667 |
| chr17:66199079-66202079 | 3000 | 1.43333333 |
| chr17:68801896-68804896 | 3000 | 1.63333333 |
| chr17:74897616-74901616 | 4000 | 1.225      |
| chr17:75880616-75883616 | 3000 | 1.2        |
| chr17:77444616-77449616 | 5000 | 1.22       |
| chr17:83051616-83054616 | 3000 | 1.03333333 |
| chr17:83070616-83073616 | 3000 | 2.3        |
| chr17:84504616-84507616 | 3000 | 1.73333333 |
| chr17:88189279-88192279 | 3000 | 0.43333333 |
| chr17:88392279-88395279 | 3000 | 0.56666667 |
| chr17:88689279-88692279 | 3000 | 0.6        |
| chr17:95684279-95688279 | 4000 | 0.45       |
| chr17:97016429-97019429 | 3000 | 0.8        |
| chr18:897001-901001     | 4000 | 1.225      |
| chr18:5709485-5712485   | 3000 | 0.5        |
| chr18:8342485-8346485   | 4000 | 0.45       |
| chr18:8913485-8916485   | 3000 | 0.73333333 |
| chr18:9023485-9026485   | 3000 | 0.63333333 |
| chr18:9645485-9648485   | 3000 | 1.6        |
| chr18:11376485-11380485 | 4000 | 0.55       |
| chr18:11998485-12001485 | 3000 | 0.36666667 |
| chr18:12372485-12375485 | 3000 | 0.9        |
| chr18:12718485-12721485 | 3000 | 0.76666667 |
| chr18:12976485-12981485 | 5000 | 1.44       |
| chr18:14437841-14441841 | 4000 | 1.7        |
| chr18:16921841-16924841 | 3000 | 0.4        |
| chr18:21035841-21039841 | 4000 | 0.25       |
| chr18:21096841-21100841 | 4000 | 0.925      |
| chr18:25337841-25340841 | 3000 | 0.66666667 |
| chr18:27480841-27484841 | 4000 | 1.05       |
| chr18:27650841-27654841 | 4000 | 1          |
| chr18:29378135-29382135 | 4000 | 1.5        |
| chr18:29532037-29535037 | 3000 | 1.13333333 |
| chr18:29538037-29541037 | 3000 | 0.93333333 |
| chr18:30036571-30040571 | 4000 | 1.425      |
| chr18:32003986-32009986 | 6000 | 1.21666667 |
| chr18:35808986-35813986 | 5000 | 1.52       |
| chr18:38979986-38982986 | 3000 | 1.6        |
| chr18:40053961-40056961 | 3000 | 1.6        |



|                         |      |            |
|-------------------------|------|------------|
| chr18:42532961-42536961 | 4000 | 1.725      |
| chr18:47826451-47829451 | 3000 | 1.8        |
| chr18:48404451-48410451 | 6000 | 1.11666667 |
| chr18:49680451-49683451 | 3000 | 0.43333333 |
| chr18:49705451-49708451 | 3000 | 0.53333333 |
| chr18:51710451-51713451 | 3000 | 0.2        |
| chr18:55547451-55550451 | 3000 | 1.2        |
| chr18:58101159-58104159 | 3000 | 0.53333333 |
| chr18:58486159-58489159 | 3000 | 1.53333333 |
| chr18:58805159-58811159 | 6000 | 1.3        |
| chr18:62051418-62056418 | 5000 | 1.3        |
| chr18:63123418-63128418 | 5000 | 1.84       |
| chr18:63235418-63238418 | 3000 | 0.4        |
| chr18:67948418-67951418 | 3000 | 0.6        |
| chr18:71014418-71019418 | 5000 | 0.8        |
| chr18:71181418-71184418 | 3000 | 1          |
| chr18:76324418-76327418 | 3000 | 1.76666667 |
| chr18:77912418-77915418 | 3000 | 0.36666667 |
| chr18:82792418-82796418 | 4000 | 1.25       |
| chr18:84519418-84522418 | 3000 | 0.73333333 |
| chr18:84686418-84689418 | 3000 | 0.4        |
| chr19:621004-626004     | 5000 | 0.36       |
| chr19:9589861-9597861   | 8000 | 1.925      |
| chr19:11004861-11007861 | 3000 | 1.43333333 |
| chr19:11991585-11995585 | 4000 | 0.5        |
| chr19:13664585-13669585 | 5000 | 1.64       |
| chr19:14115939-14118939 | 3000 | 2.26666667 |
| chr19:15902414-15908414 | 6000 | 0.8        |
| chr19:17640414-17643414 | 3000 | 0.43333333 |
| chr19:19601414-19607414 | 6000 | 1.01666667 |
| chr19:22773563-22778563 | 5000 | 1.22       |
| chr19:22793563-22796563 | 3000 | 2.33333333 |
| chr19:23531553-23535553 | 4000 | 2.025      |
| chr19:24205553-24210553 | 5000 | 1.78       |
| chr19:24218553-24222553 | 4000 | 1.075      |
| chr19:24378553-24381553 | 3000 | 1.36666667 |
| chr19:24512553-24517553 | 5000 | 1.68       |
| chr19:24535553-24539553 | 4000 | 1.125      |
| chr19:25997352-26000352 | 3000 | 0.86666667 |
| chr19:26270352-26276352 | 6000 | 0.66666667 |
| chr19:26288352-26291352 | 3000 | 1.83333333 |
| chr19:26337352-26341352 | 4000 | 0.475      |
| chr19:27691352-27694352 | 3000 | 1.23333333 |
| chr19:29535352-29538352 | 3000 | 0.8        |
| chr19:29912352-29917352 | 5000 | 1.3        |
| chr19:31552352-31555352 | 3000 | 1          |
| chr19:41998670-42001670 | 3000 | 1.9        |
| chr19:42417670-42420670 | 3000 | 1.2        |
| chr19:55027507-55030507 | 3000 | 1.1        |
| chr20:225001-231001     | 6000 | 0.63333333 |
| chr20:254001-258001     | 4000 | 0.625      |
| chr20:328001-333001     | 5000 | 0.84       |
| chr20:1247929-1250929   | 3000 | 0.3        |

|                          |       |            |
|--------------------------|-------|------------|
| chr20:1440929-1444929    | 4000  | 0.65       |
| chr20:2171508-2176508    | 5000  | 0.72       |
| chr20:2686508-2691508    | 5000  | 0.82       |
| chr20:2913508-2916508    | 3000  | 1.56666667 |
| chr20:3454093-3457093    | 3000  | 1.5        |
| chr20:3474093-3479093    | 5000  | 1.38       |
| chr20:3531093-3536093    | 5000  | 1.46       |
| chr20:4353723-4356723    | 3000  | 1.5        |
| chr20:4385723-4389723    | 4000  | 1.7        |
| chr20:5035815-5041815    | 6000  | 1.36666667 |
| chr20:14434378-14438378  | 4000  | 2.025      |
| chr20:25367900-25370900  | 3000  | 0.8        |
| chr20:25396900-25400900  | 4000  | 1.325      |
| chr20:26832900-26835900  | 3000  | 0.6        |
| chr20:29984981-29987981  | 3000  | 2          |
| chr20:30056981-30060981  | 4000  | 1.875      |
| chr20:30311981-30315981  | 4000  | 1.125      |
| chr20:47151981-47155981  | 4000  | 1.275      |
| chr20:49229981-49232981  | 3000  | 0.86666667 |
| chr20:50680981-50684981  | 4000  | 2.1        |
| chr20:52126981-52130981  | 4000  | 0.675      |
| chr20:52165981-52169981  | 4000  | 0.5        |
| chr20:52523981-52526981  | 3000  | 0.3        |
| chr20:52581981-52584981  | 3000  | 0.56666667 |
| chr20:52995981-52999981  | 4000  | 0.35       |
| chr20:53956981-53960981  | 4000  | 1.35       |
| chrX:68206209-68222209   | 16000 | 0.70625    |
| chrX:23301999-23317999   | 16000 | 0.95625    |
| chrX:25497999-25506999   | 9000  | 0.55555556 |
| chrX:157047510-157057510 | 10000 | 0.74       |
| chrX:51616361-51621361   | 5000  | 0.88       |
| chrX:29670077-29677077   | 7000  | 0.95714286 |
| chrX:147979510-147982510 | 3000  | 0.43333333 |
| chrX:29679077-29686077   | 7000  | 1.02857143 |
| chrX:20121999-20127999   | 6000  | 0.13333333 |
| chrX:154828510-154831510 | 3000  | 0.4        |
| chrX:51420361-51428361   | 8000  | 0.7125     |
| chrX:91355430-91369430   | 14000 | 0.64285714 |
| chrX:125504510-125508510 | 4000  | 0.325      |
| chrX:69030209-69043209   | 13000 | 0.30769231 |
| chrX:27533077-27550077   | 17000 | 0.68235294 |
| chrX:152444510-152451510 | 7000  | 0.41428571 |
| chrX:16440999-16450999   | 10000 | 0.61       |
| chrX:157029510-157041510 | 12000 | 0.91666667 |
| chrX:18342999-18347999   | 5000  | 0.4        |
| chrX:27346077-27363077   | 17000 | 0.81176471 |
| chrX:23439999-23452999   | 13000 | 0.8        |
| chrX:94059430-94065430   | 6000  | 0.78333333 |
| chrX:20107999-20118999   | 11000 | 0.56363636 |
| chrX:101142430-101145430 | 3000  | 0.56666667 |
| chrX:26133999-26136999   | 3000  | 0.53333333 |
| chrX:149858510-149863510 | 5000  | 0.9        |
| chrX:23129999-23135999   | 6000  | 0.75       |

|                          |       |            |
|--------------------------|-------|------------|
| chrX:23501999-23510999   | 9000  | 0.72222222 |
| chrX:27443077-27455077   | 12000 | 0.525      |
| chrX:17794999-17807999   | 13000 | 0.52307692 |
| chrX:58677361-58684361   | 7000  | 0.41428571 |
| chrX:106716430-106719430 | 3000  | 0.56666667 |
| chrX:68223209-68237209   | 14000 | 0.37142857 |
| chrX:97498430-97504430   | 6000  | 0.4        |
| chrX:114385430-114389430 | 4000  | 3.35       |
| chrX:18146999-18159999   | 13000 | 0.52307692 |
| chrX:27896077-27909077   | 13000 | 0.66153846 |
| chrX:134417510-134424510 | 7000  | 0.75714286 |
| chrX:23426999-23438999   | 12000 | 0.9        |
| chrX:7015001-7018001     | 3000  | 0.23333333 |
| chrX:145959510-145974510 | 15000 | 0.54       |
| chrX:23727999-23733999   | 6000  | 0.71666667 |
| chrX:106686430-106690430 | 4000  | 0.4        |
| chrX:22052999-22066999   | 14000 | 0.81428571 |
| chrX:28830077-28833077   | 3000  | 0.56666667 |
| chrX:106700430-106715430 | 15000 | 0.34       |
| chrX:23121999-23126999   | 5000  | 0.88       |
| chrX:22394999-22398999   | 4000  | 0.6        |
| chrX:7525001-7535001     | 10000 | 0.77       |
| chrX:51697361-51701361   | 4000  | 0.525      |
